# Supplementary material for: One-pot asymmetric synthesis of a spiro[dihydrofurocoumarin/pyrazolone] scaffold by a Michael addition/I2-mediated cyclization sequence
Source: Royal Society of Chemistry journal article supplement (doi:10.1039/c7ob00986k), 2017-01-01
Supplement: c7ob00986k1.pdf [file c7ob00986k1.pdf]

# Supporting Information for

## One-pot Asymmetric Synthesis of Spiro[dihydrofurocoumarin/pyroazolone] Scaffold by Michael Addition/I<sub>2</sub>-Mediated Cyclization Sequence

Ai-Bao Xia,<sup>a†</sup> Xiao-Long Zhang,<sup>a†</sup> Cheng-Ke Tang,<sup>a</sup> Kai-Xiang Feng,<sup>a</sup> Xiao-Hua Du,<sup>a</sup> and  
Dan-Qian Xu<sup>\* a</sup>

Catalytic Hydrogenation Research Centre, State Key Laboratory Breeding Base of Green Chemistry-Synthesis Technology,

Zhejiang University of Technology, Hangzhou 310014, P. R. China

Fax (+86) 0571 88320066; phone: (+86) 0571 88320609; E-mail: chrc@zjut.edu.cn

| Table of Contents                                                                                                                                                          | Page    |
|----------------------------------------------------------------------------------------------------------------------------------------------------------------------------|---------|
| 1. Scheme S1.                                                                                                                                                              | S2      |
| 2. ESI-MS spectra, high resolution mass data of intermediates <b>A</b> and <b>B</b> , and<br><sup>1</sup> H, <sup>13</sup> C NMR spectra, HPLC chromatograms of <b>A</b> . | S3-S5   |
| 3. <sup>1</sup> H spectra of crude compounds <b>4aj</b> and <b>4al</b> .                                                                                                   | S6      |
| 4. <sup>1</sup> H, <sup>13</sup> C NMR spectra, and HPLC chromatograms of compounds <b>4aa-4aq</b> ,<br><b>4ba-4bk</b> and <b>5a-5e</b> .                                  | S7-S70  |
| 5. X-ray crystal structures of compound <b>4aj</b> , <b>4al</b> and <b>4ap</b> .                                                                                           | S71-S74 |

## 1. Scheme S1.

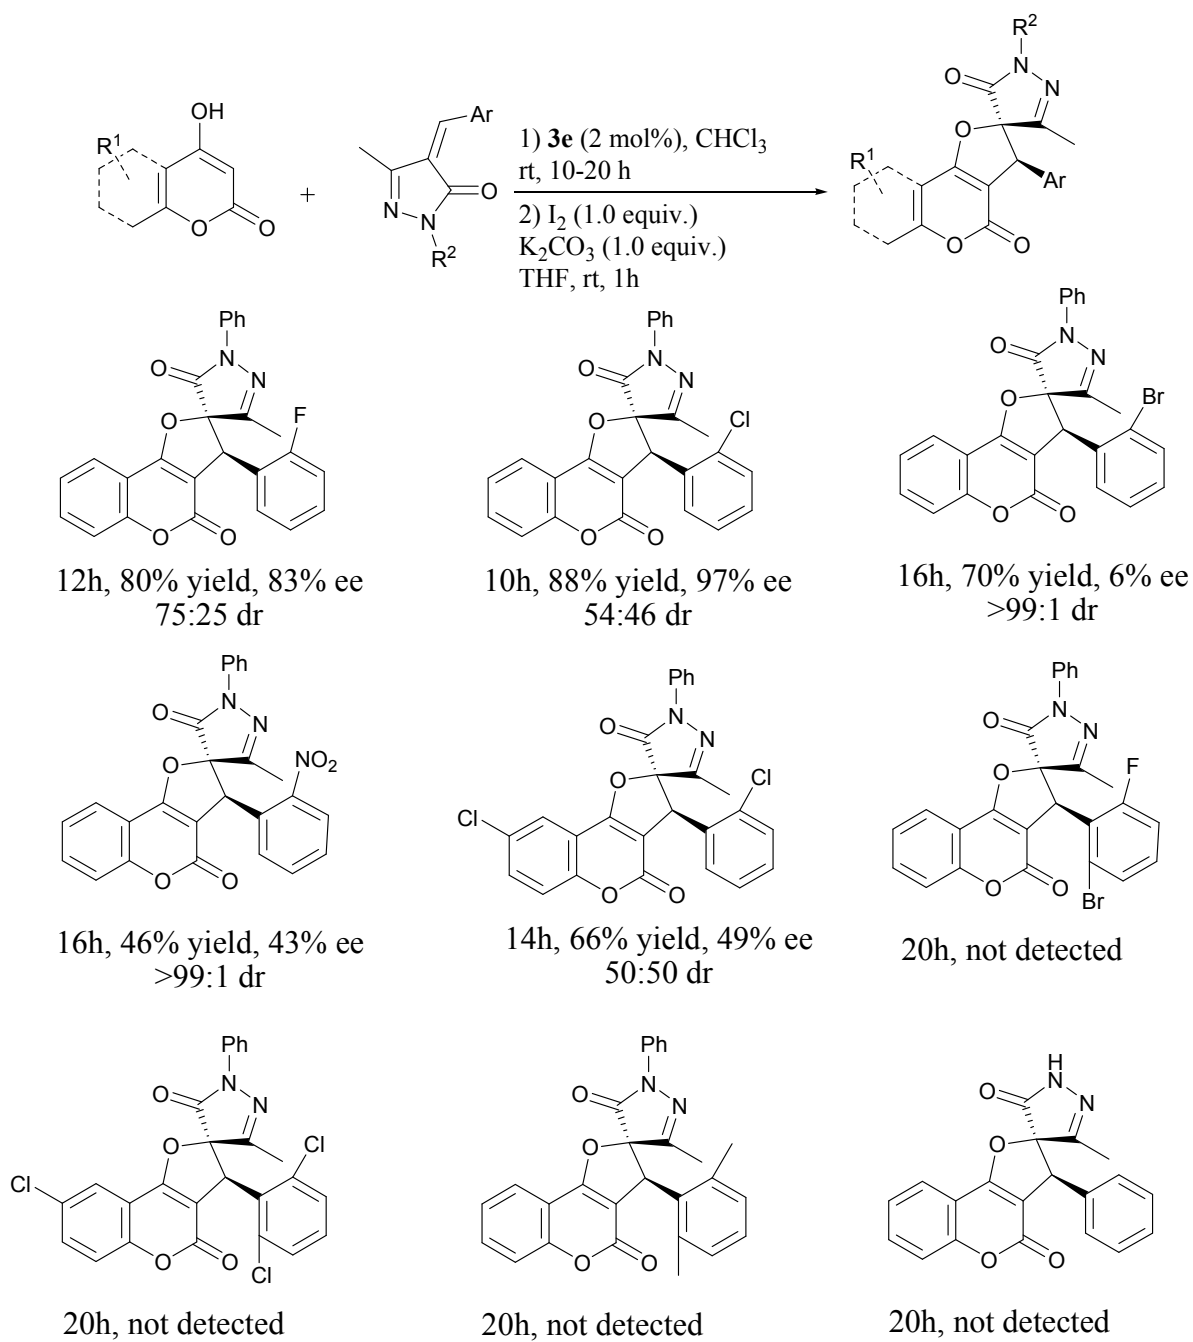

## 2. ESI-MS spectra, high resolution mass data of intermediates A and B, and $^1\text{H}$ , $^{13}\text{C}$ NMR spectra, HPLC chromatograms of A.

### 2.1 ESI-MS spectra, high resolution mass data of intermediates A and B.

Figure S1. ESI-MS spectrum of A, after 8 h of the Michael reaction.

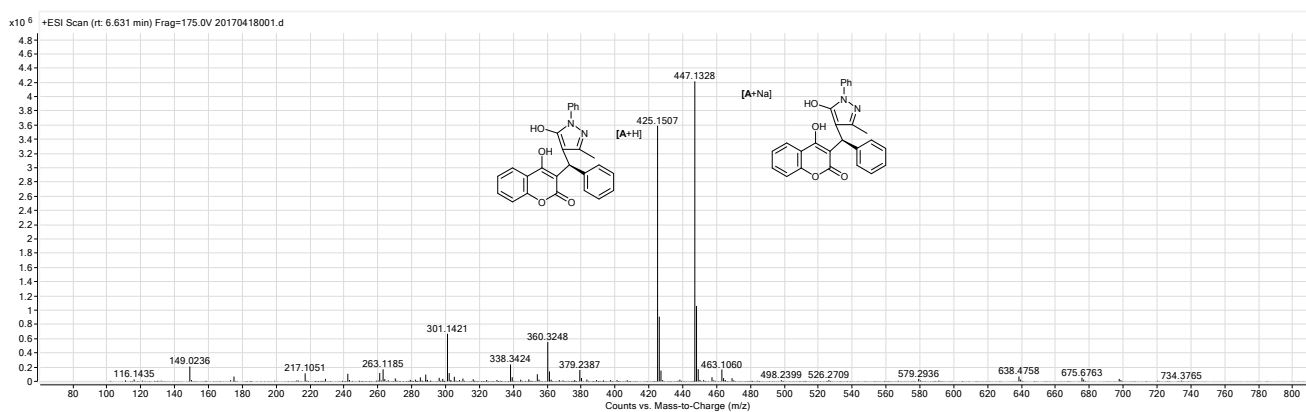

Figure S2. ESI-MS spectrum of B, after 0.2 h of the  $\text{I}_2$ -mediated cyclization reaction.

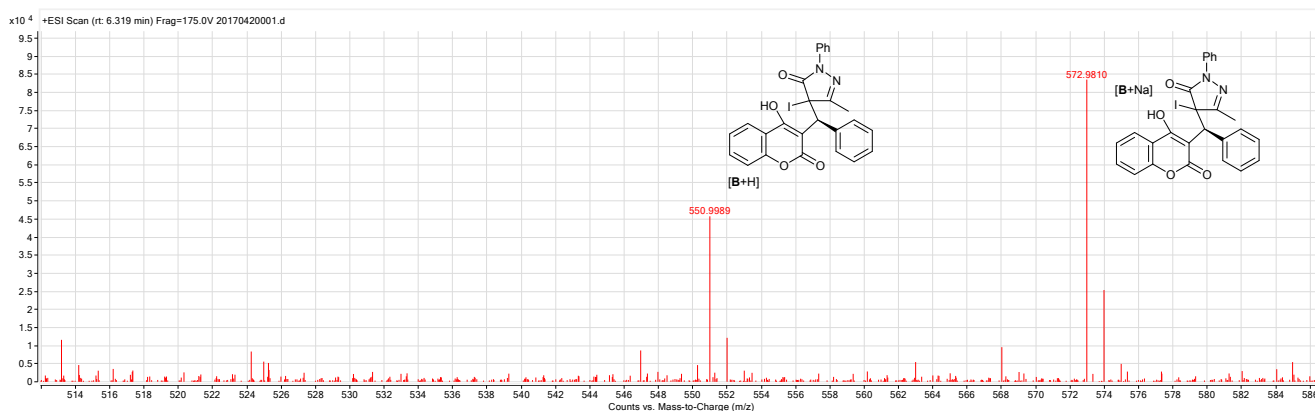

Table S1. High resolution mass data of detected intermediates A and B.

| Species | Formula                                           | Mass (measured) | Mass (calculated) | Error (ppm) |
|---------|---------------------------------------------------|-----------------|-------------------|-------------|
| A       | $\text{C}_{26}\text{H}_{20}\text{N}_2\text{O}_4$  | 424.1507        | 424.1501          | 1.4         |
| B       | $\text{C}_{26}\text{H}_{19}\text{IN}_2\text{O}_4$ | 549.9999        | 549.9986          | 2.4         |

## 2.2 $^1\text{H}$ , $^{13}\text{C}$ NMR spectra, and HPLC chromatograms of A.

### $^1\text{H}$ NMR, $^{13}\text{C}$ NMR spectra of A

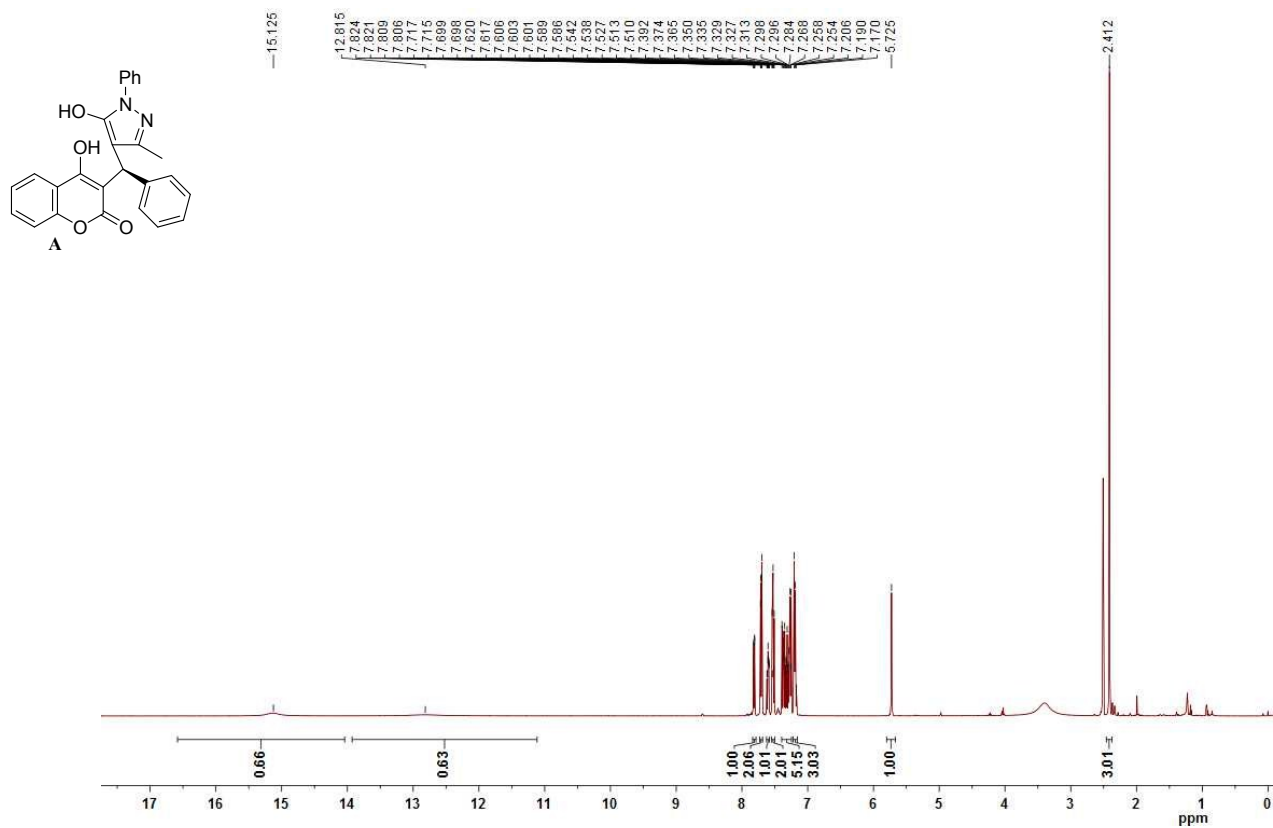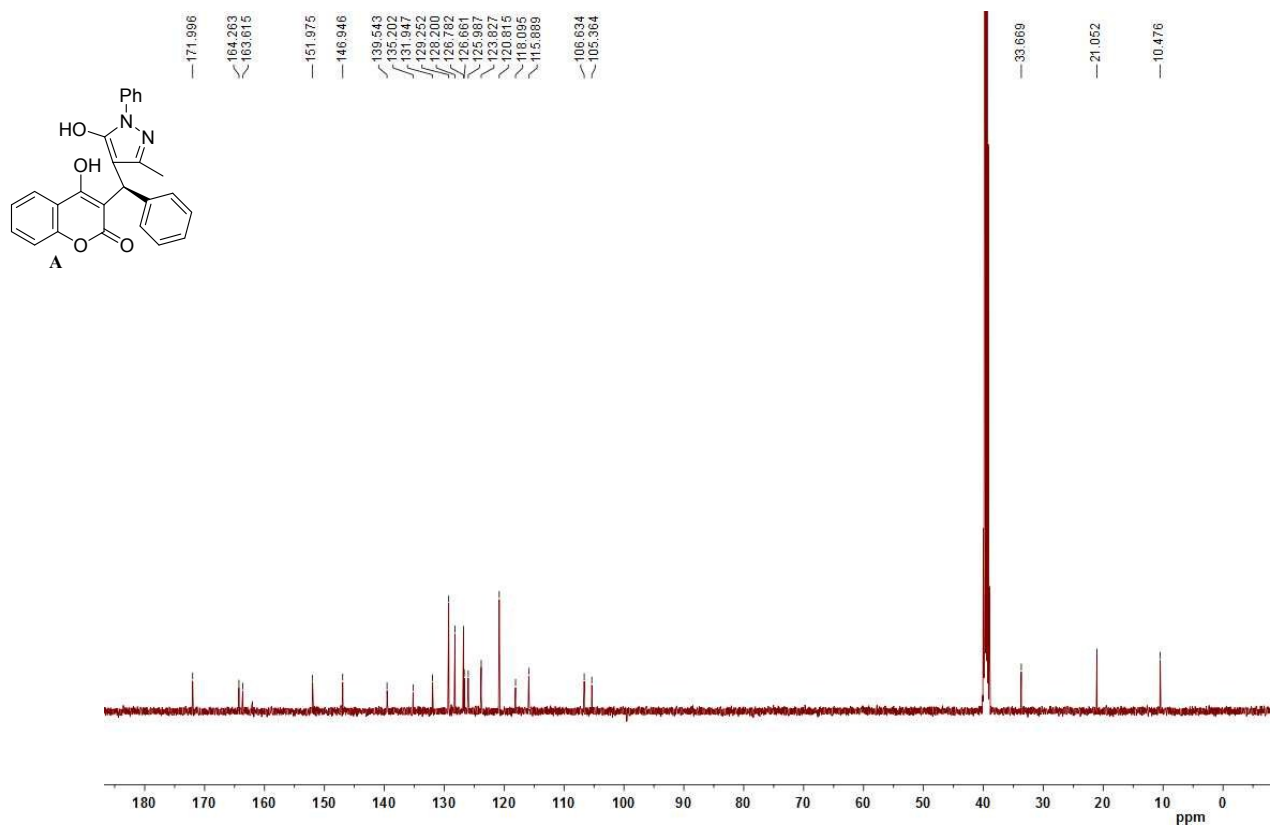

### HPLC chromatogram of A (racemic)

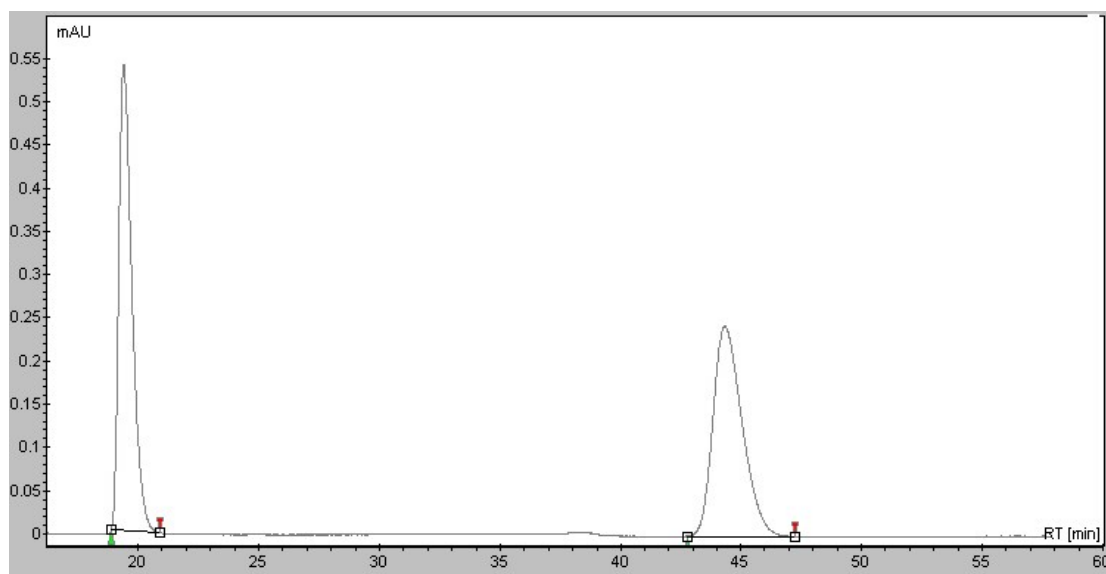

| # | Start time[min] | Time[min] | End time[min] | Area%  |
|---|-----------------|-----------|---------------|--------|
| 1 | 18.872          | 19.385    | 20.888        | 49.975 |
| 2 | 42.744          | 44.317    | 47.261        | 50.025 |

### HPLC chromatogram of A (chiral)

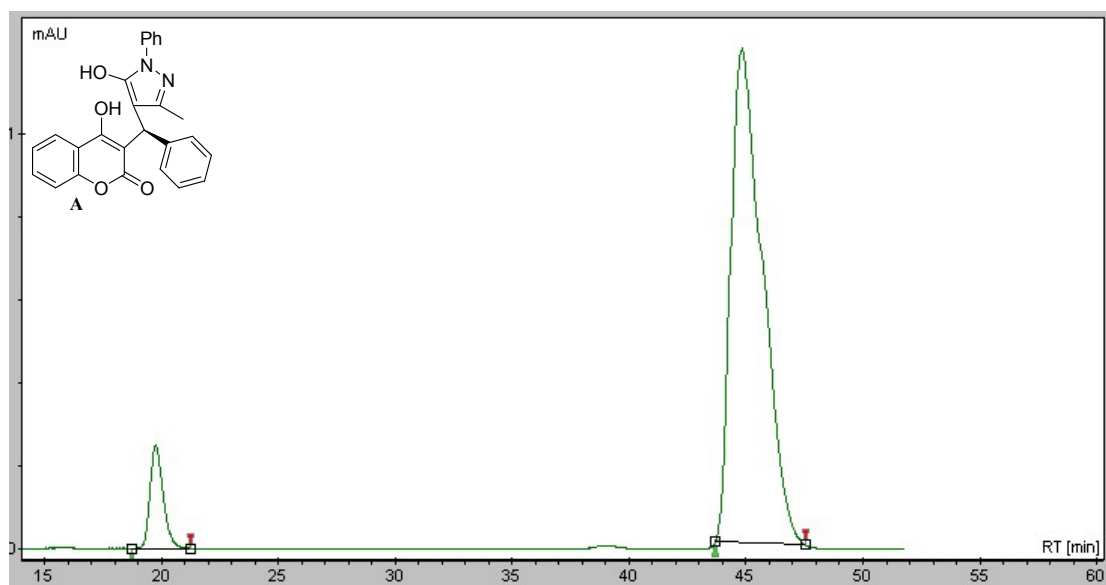

| # | Start time[min] | Time[min] | End time[min] | Area%  |
|---|-----------------|-----------|---------------|--------|
| 1 | 18.748          | 19.745    | 21.272        | 7.947  |
| 2 | 43.697          | 44.810    | 47.519        | 92.053 |

### 3. $^1\text{H}$ spectra of crude compounds 4aj and 4al.

#### $^1\text{H}$ NMR (500 MHz, $\text{CDCl}_3$ ) spectrum of crude compound 4aj

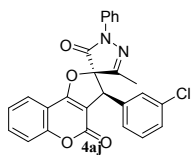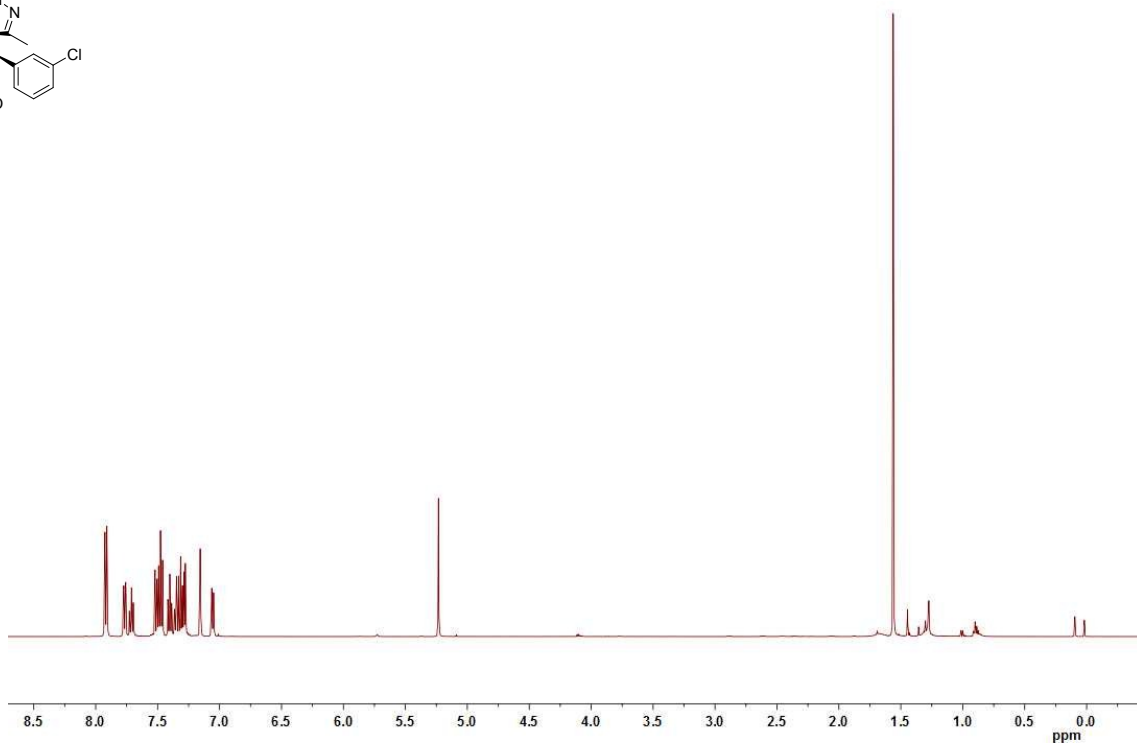

#### $^1\text{H}$ NMR (500 MHz, $\text{CDCl}_3$ ) spectrum of crude compound 4al

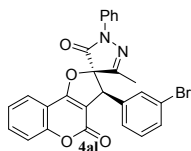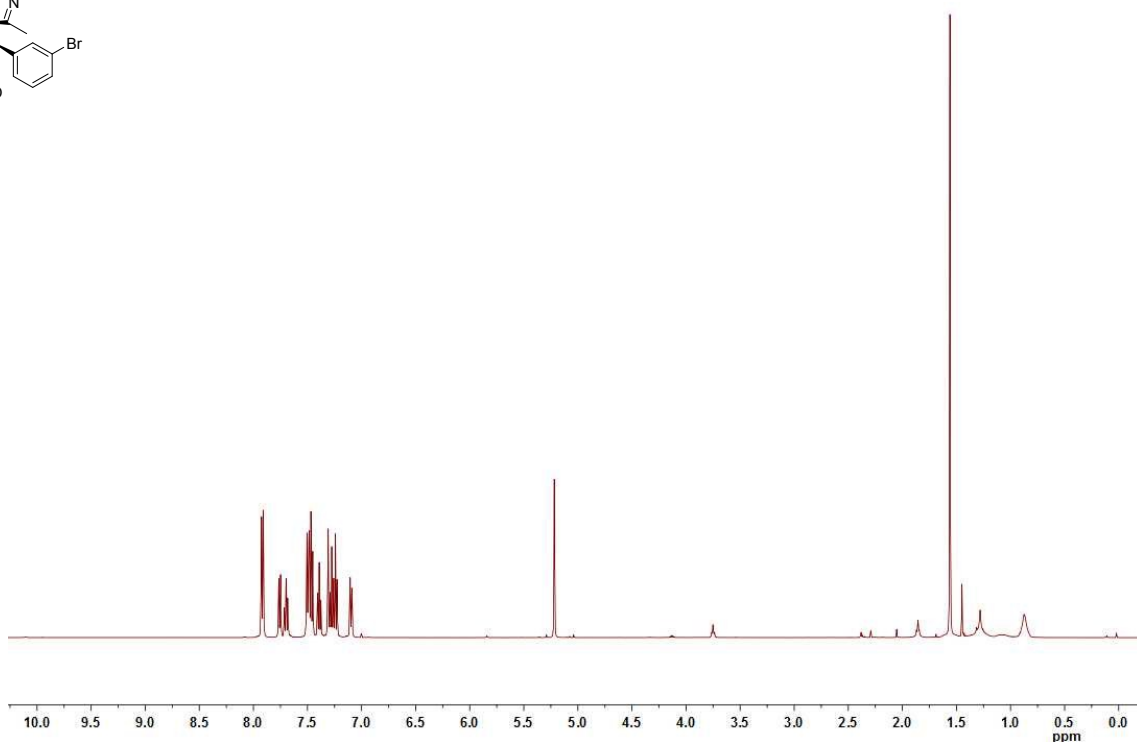

# 4. $^1\text{H}$ , $^{13}\text{C}$ NMR, and HPLC chromatograms of compounds 4aa-4ap, 4ba-4bk, and 5a-5e.

## $^1\text{H}$ NMR, $^{13}\text{C}$ NMR spectra of 4aa

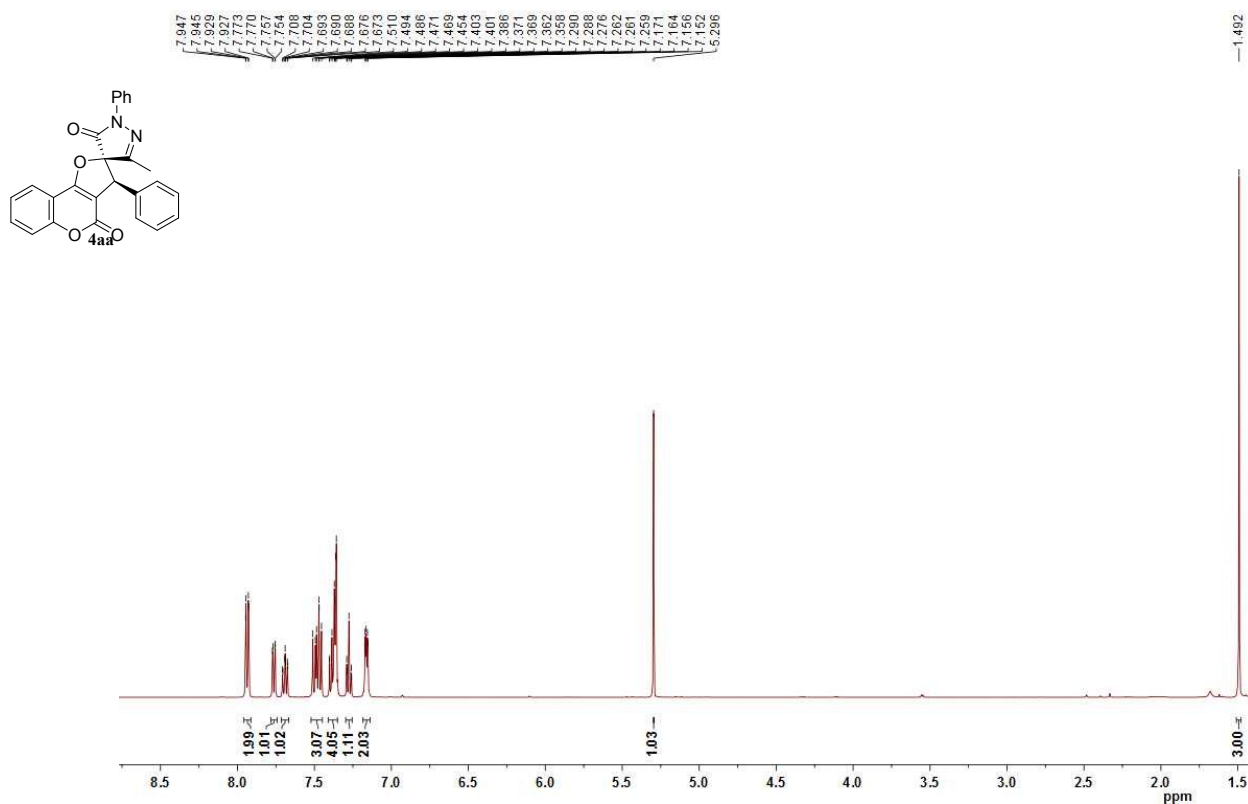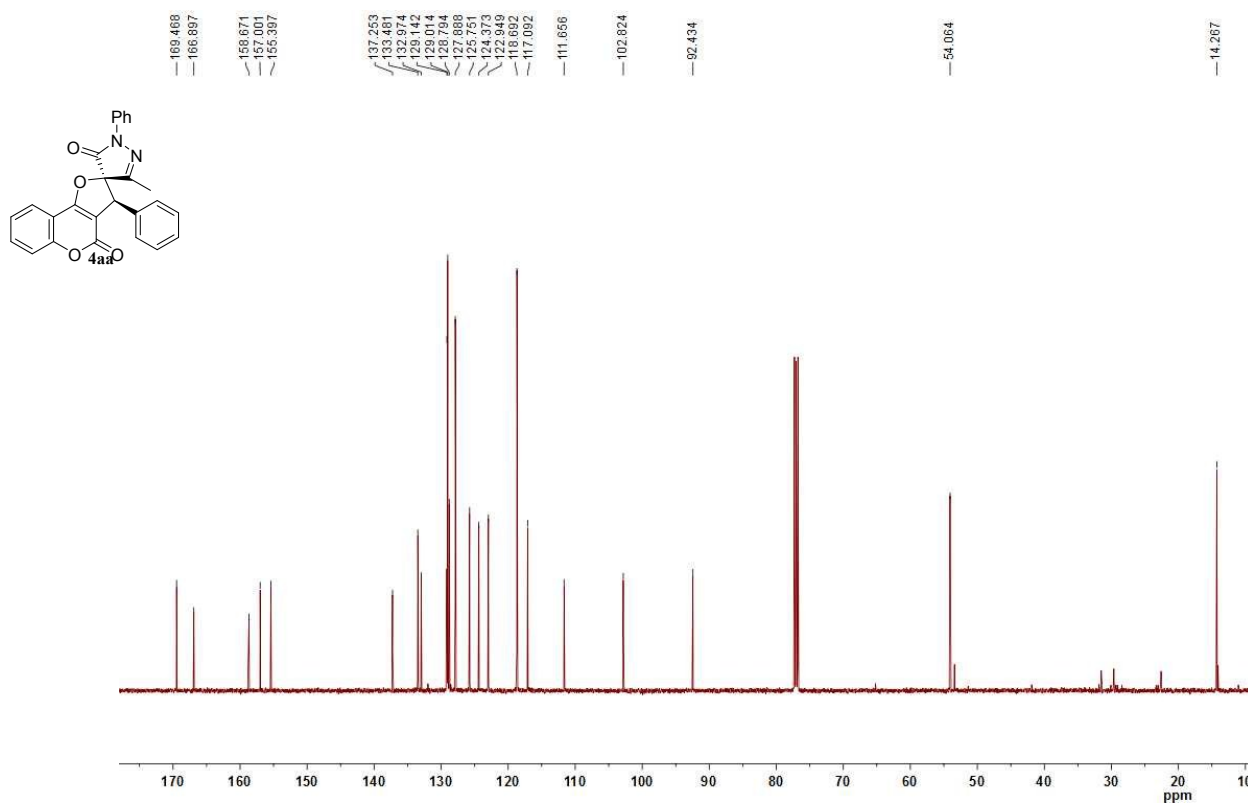

## HPLC chromatogram of 4aa (racemic)

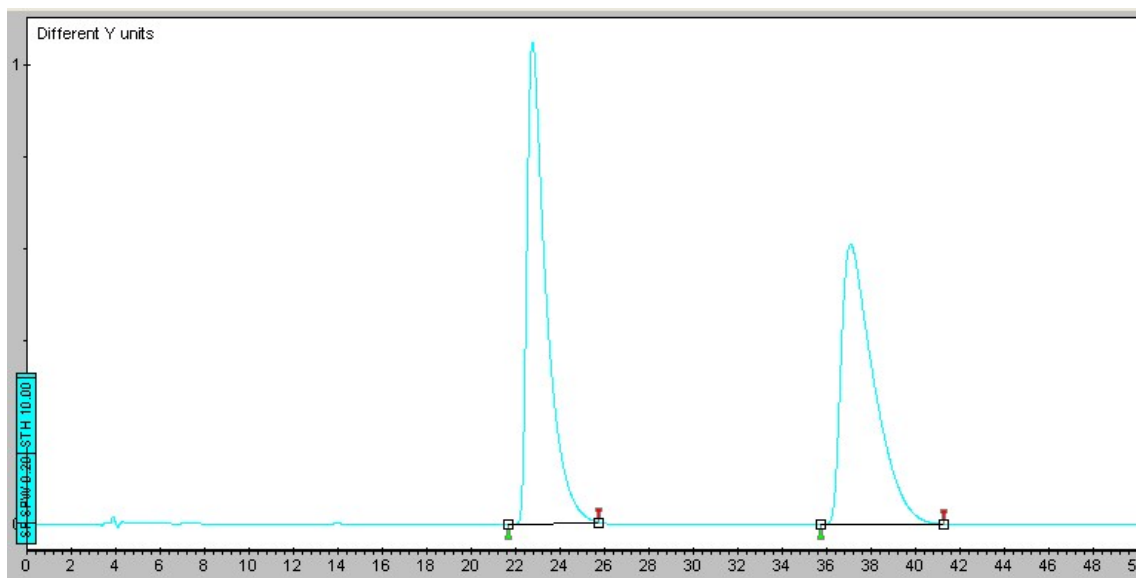

|   | Start [Min] | Time [Min] | End [Min] | Area % [%] |
|---|-------------|------------|-----------|------------|
| 1 | 21.676      | 22.778     | 25.744    | 50.555     |
| 2 | 35.748      | 37.093     | 41.284    | 49.445     |

## HPLC chromatogram of 4aa (chiral)

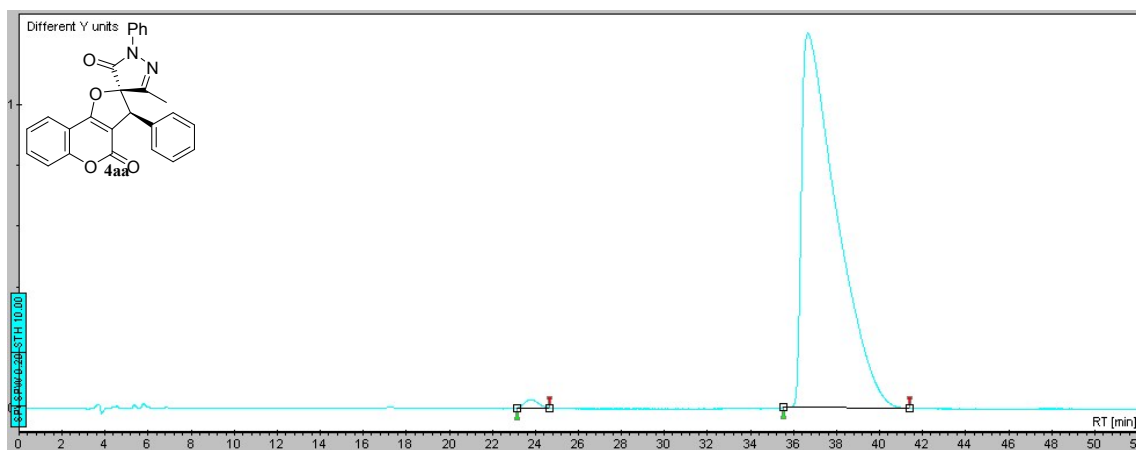

|   | Start [Min] | Time [Min] | End [Min] | Area % [%] |
|---|-------------|------------|-----------|------------|
| 1 | 23.147      | 23.772     | 24.654    | 0.867      |
| 2 | 35.527      | 36.651     | 41.395    | 99.133     |



# <sup>1</sup>H NMR, <sup>13</sup>C NMR spectra of 4ab

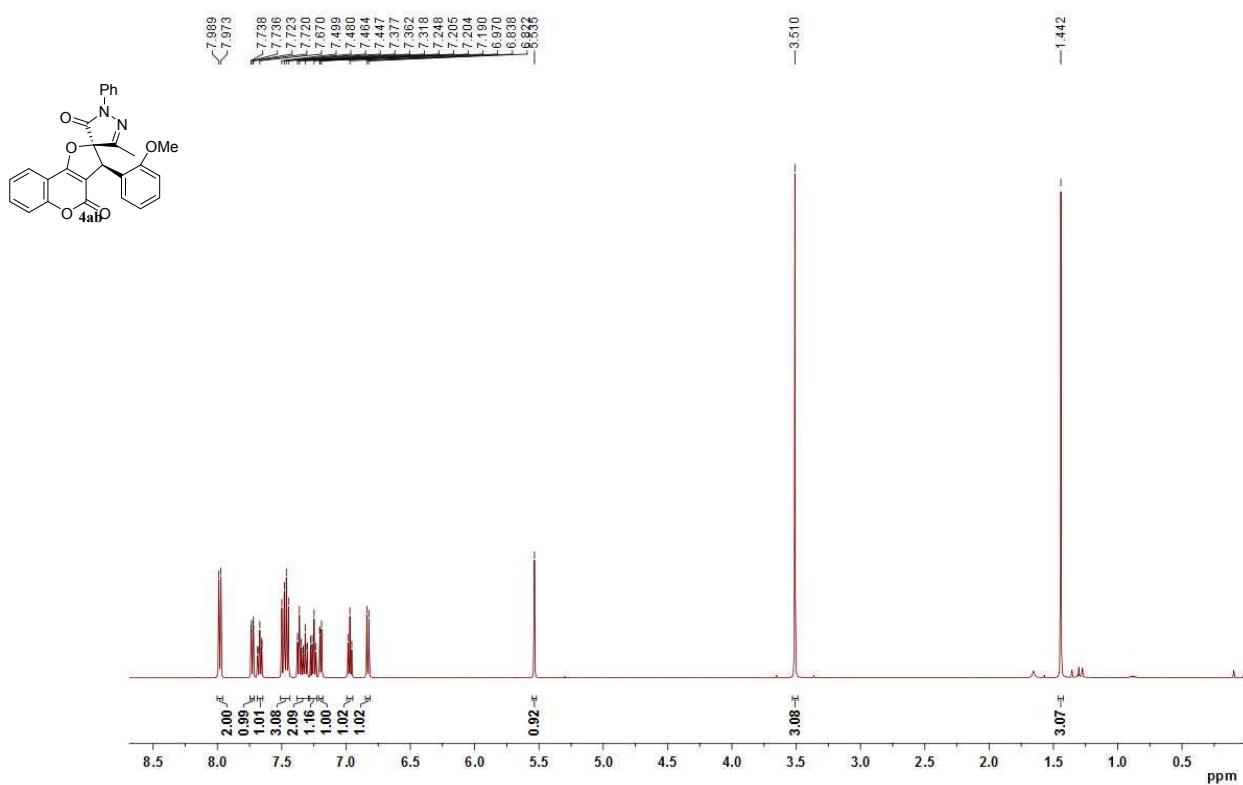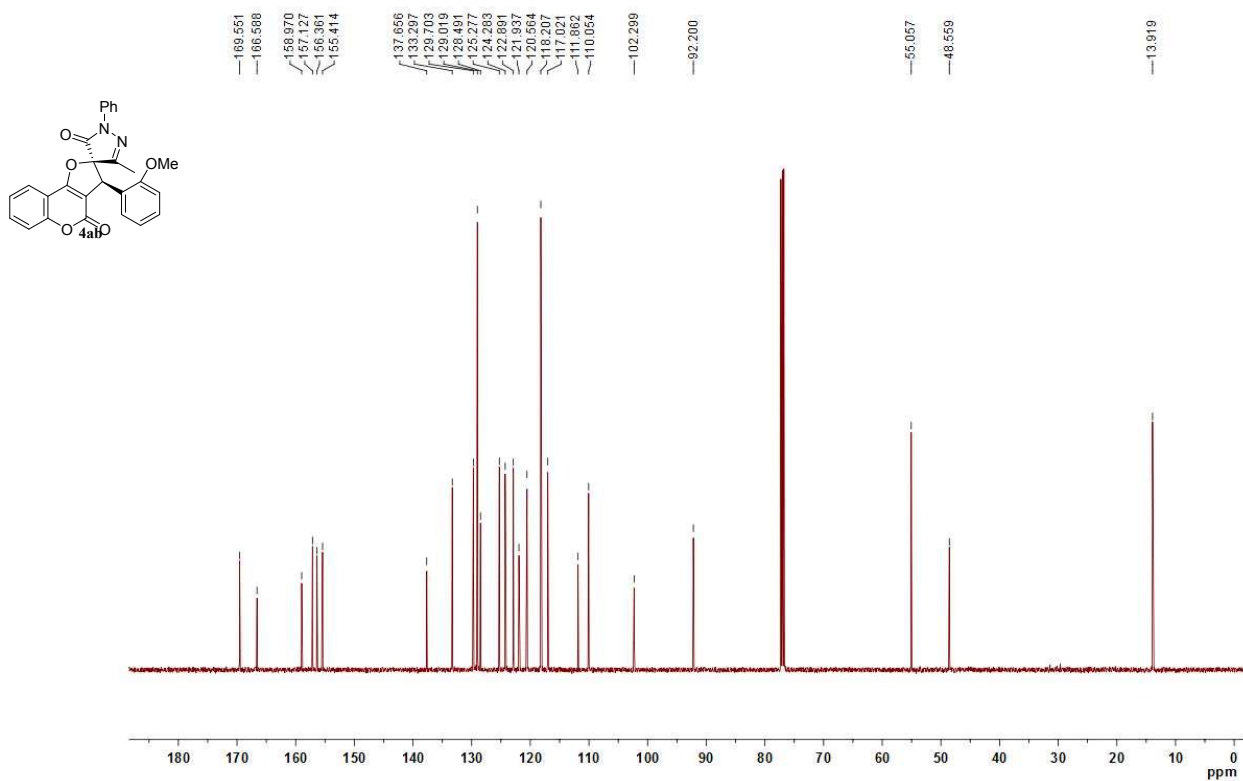

### HPLC chromatogram of 4ab (racemic)

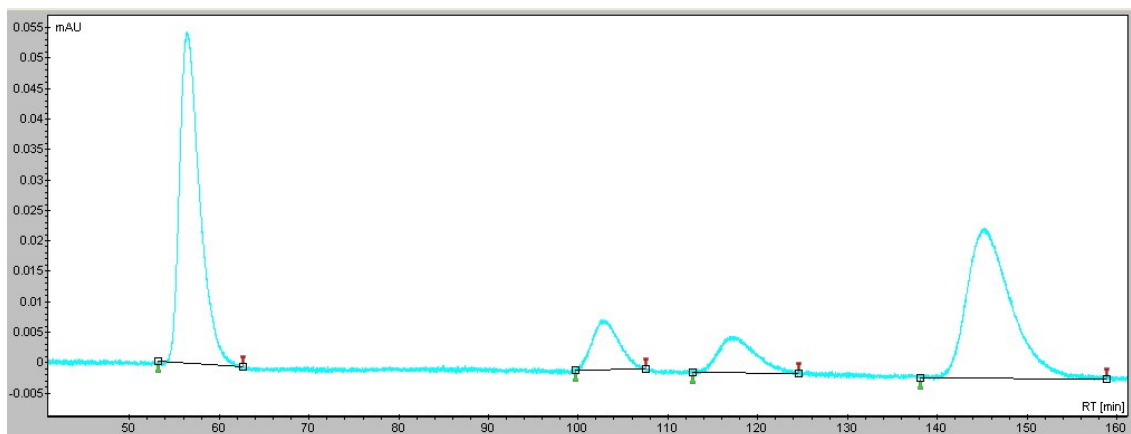

| # | Start [Min] | Time [Min] | End [Min] | Area % [%] |
|---|-------------|------------|-----------|------------|
| 1 | 53.178      | 56.454     | 62.661    | 41.767     |
| 2 | 99.662      | 102.798    | 107.471   | 8.325      |
| 3 | 112.678     | 117.171    | 124.578   | 8.12       |
| 4 | 138.546     | 145.654    | 159.213   | 41.788     |

### HPLC chromatogram of 4ab (chiral)

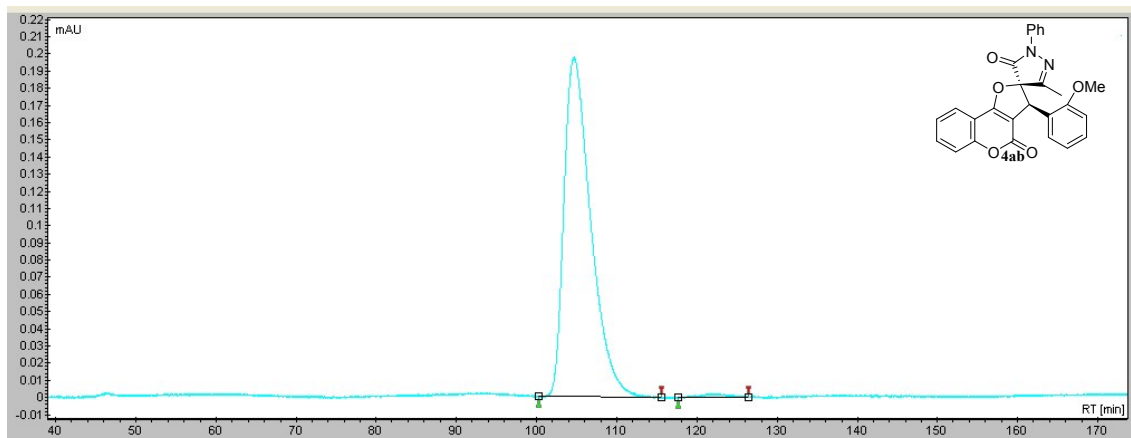

| # | Start [Min] | Time [Min] | End [Min] | Area % [%] |
|---|-------------|------------|-----------|------------|
| 1 | 100.294     | 104.676    | 115.587   | 99.157     |
| 2 | 117.686     | 121.753    | 126.441   | 0.843      |

# <sup>1</sup>H NMR, <sup>13</sup>C NMR spectra of 4ac

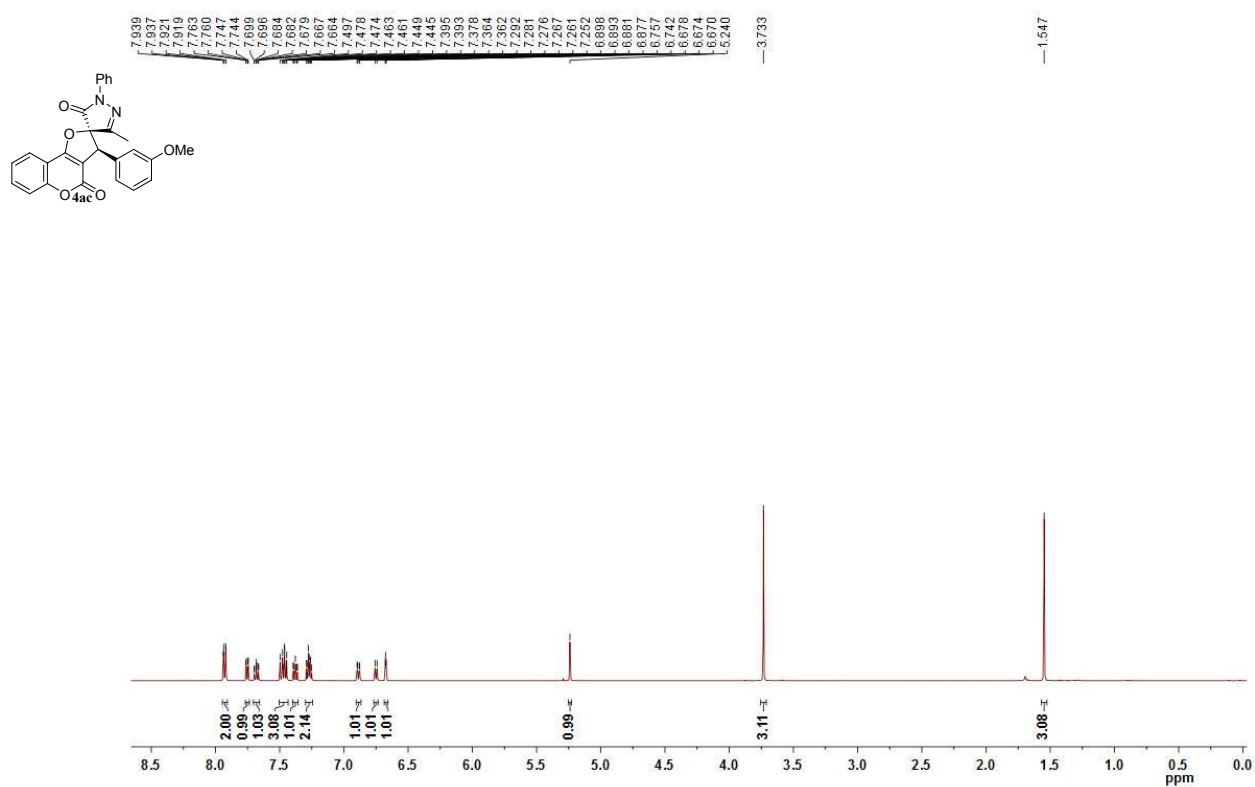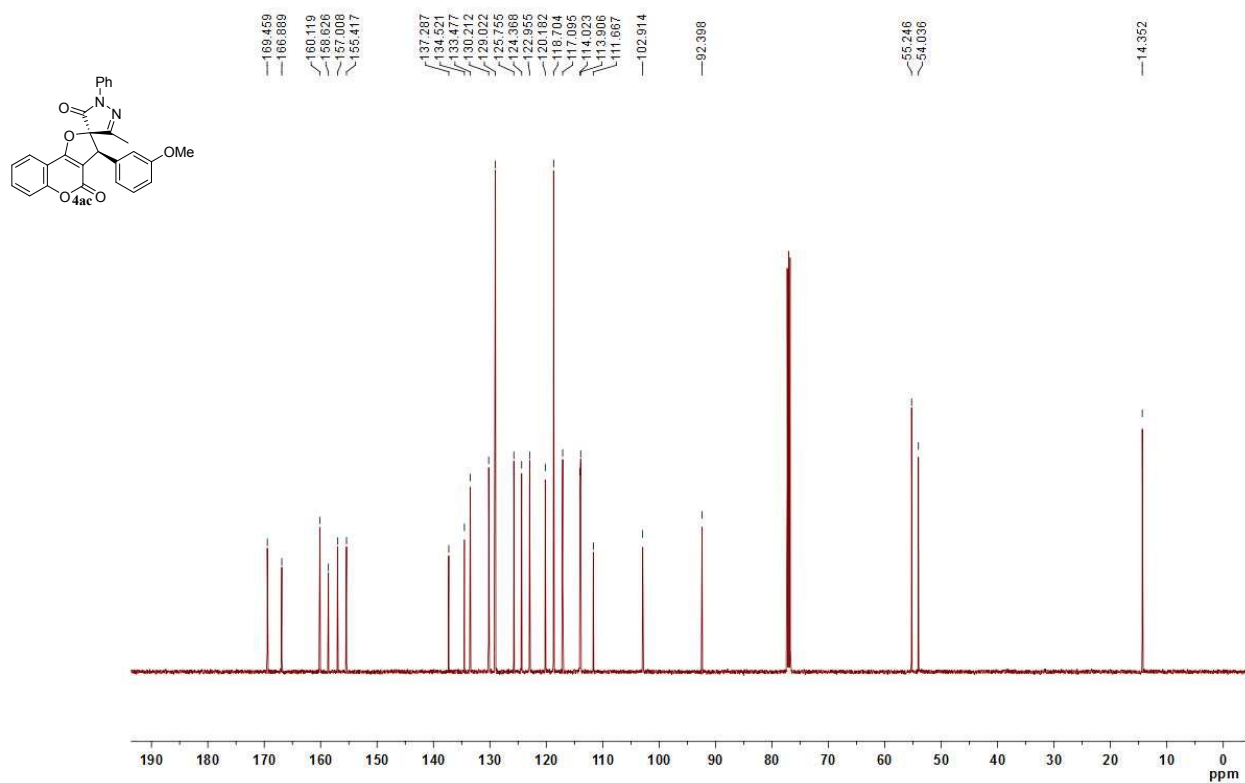

## HPLC chromatogram of 4ac (racemic)

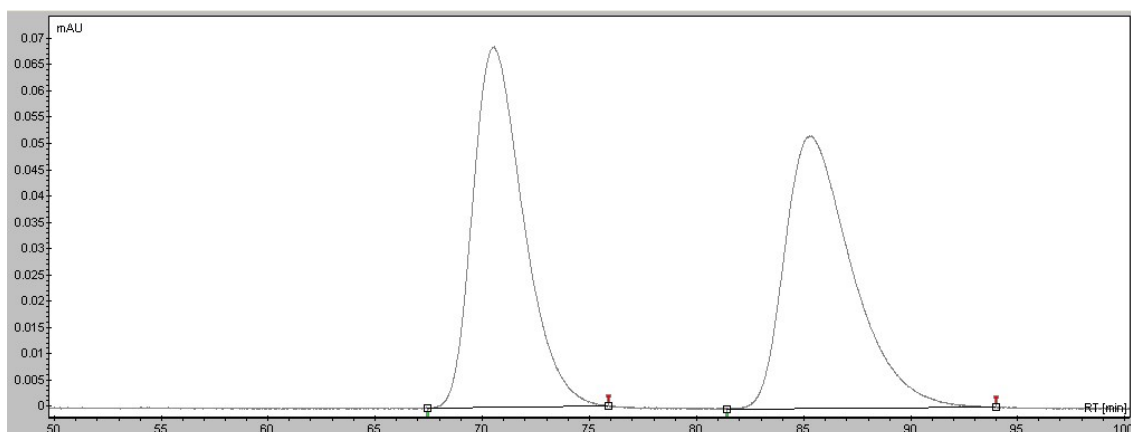

| # | Start [Min] | Time [Min] | End [Min] | Area % [%] |
|---|-------------|------------|-----------|------------|
| 1 | 67.41       | 70.521     | 75.869    | 49.819     |
| 2 | 81.421      | 85.276     | 93.977    | 50.181     |

## HPLC chromatogram of 4ac (chiral)

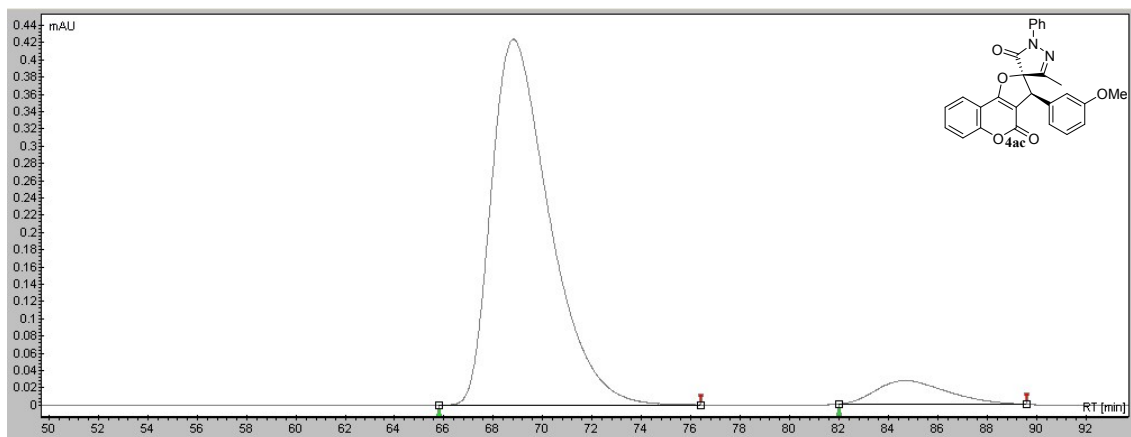

| # | Start [Min] | Time [Min] | End [Min] | Area % [%] |
|---|-------------|------------|-----------|------------|
| 1 | 65.805      | 68.842     | 76.369    | 92.707     |
| 2 | 81.981      | 84.716     | 89.574    | 7.293      |

# <sup>1</sup>H NMR, <sup>13</sup>C NMR spectra of 4ad

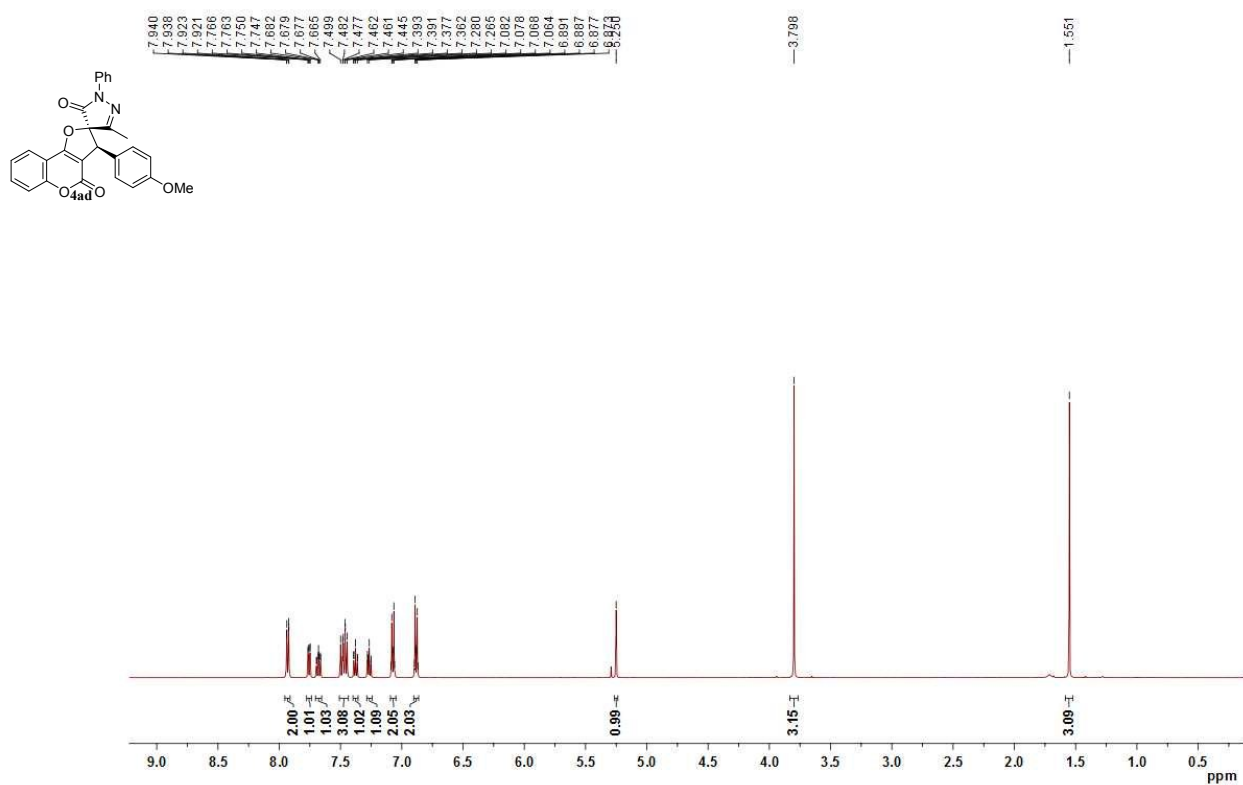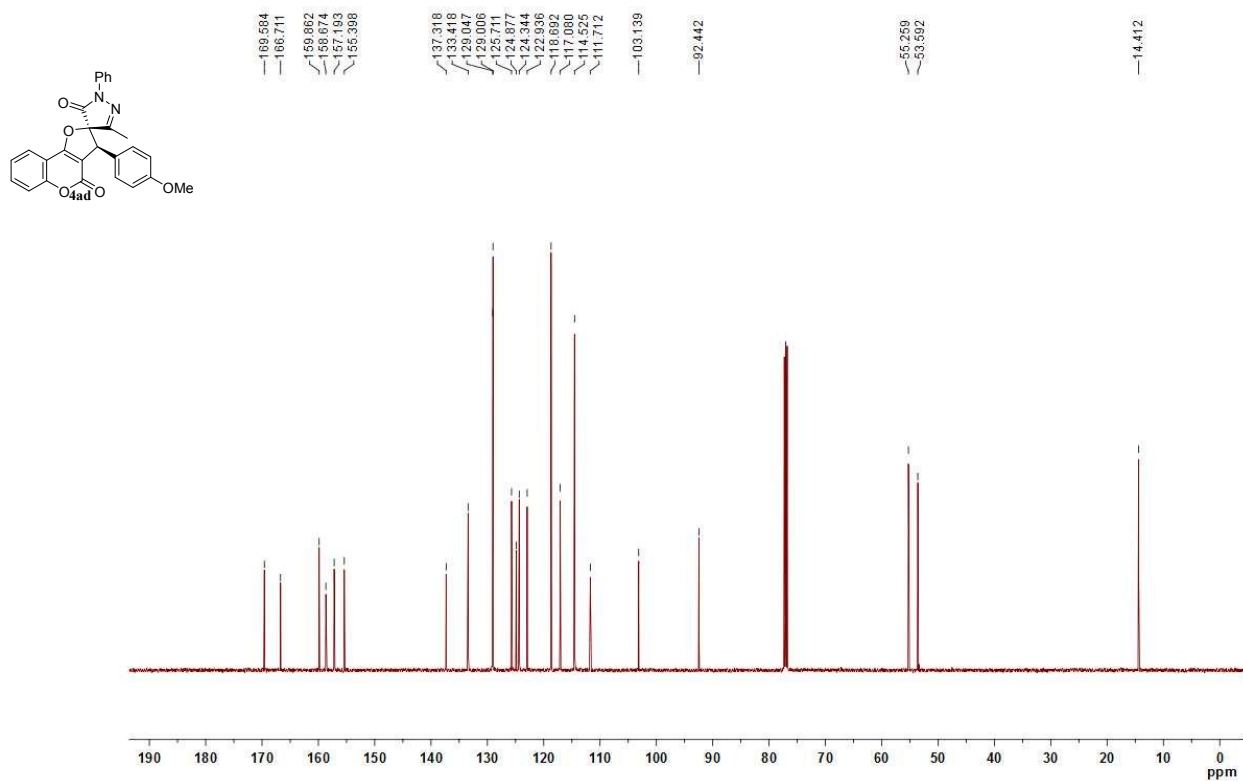

### HPLC chromatogram of 4ad (racemic)

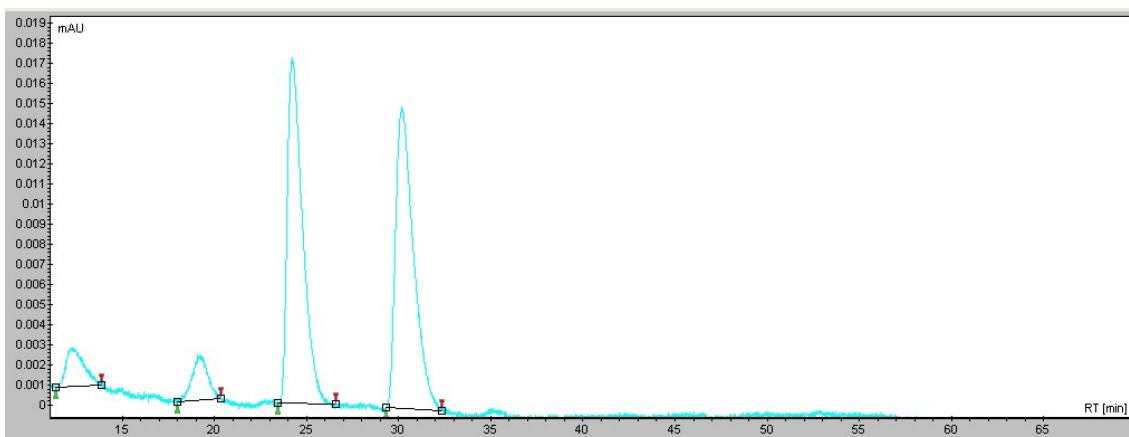

| # | Start time[min] | Time[min] | End time[min] | Area%  |
|---|-----------------|-----------|---------------|--------|
| 1 | 11.386          | 12.239    | 13.869        | 5.817  |
| 2 | 17.988          | 19.199    | 20.35         | 5.832  |
| 3 | 23.439          | 24.225    | 26.588        | 43.578 |
| 4 | 29.313          | 30.184    | 32.342        | 44.773 |

### HPLC chromatogram of 4ad (chiral)

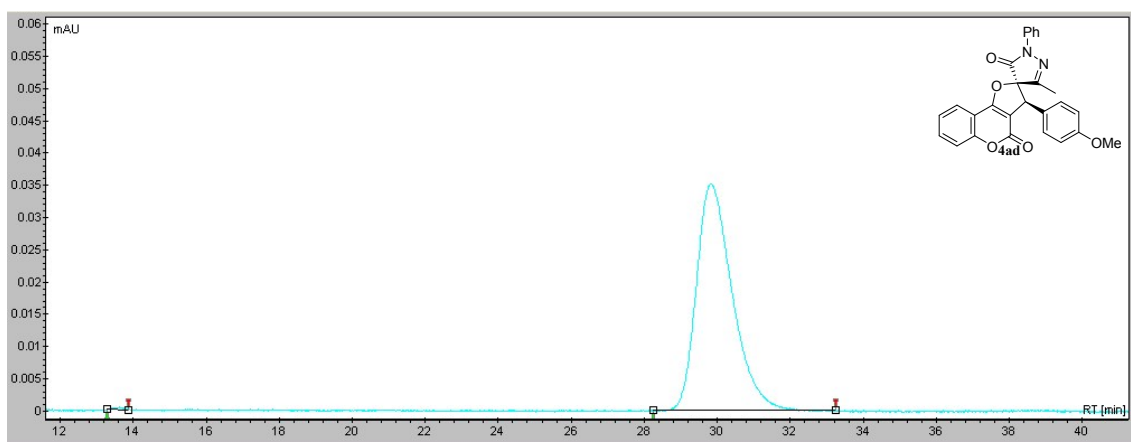

| # | Start [Min] | Time [Min] | End [Min] | Area % [%] |
|---|-------------|------------|-----------|------------|
| 1 | 13.286      | 13.608     | 13.868    | 0.242      |
| 2 | 28.234      | 29.829     | 33.236    | 99.758     |

# <sup>1</sup>H NMR, <sup>13</sup>C NMR spectra of 4ae

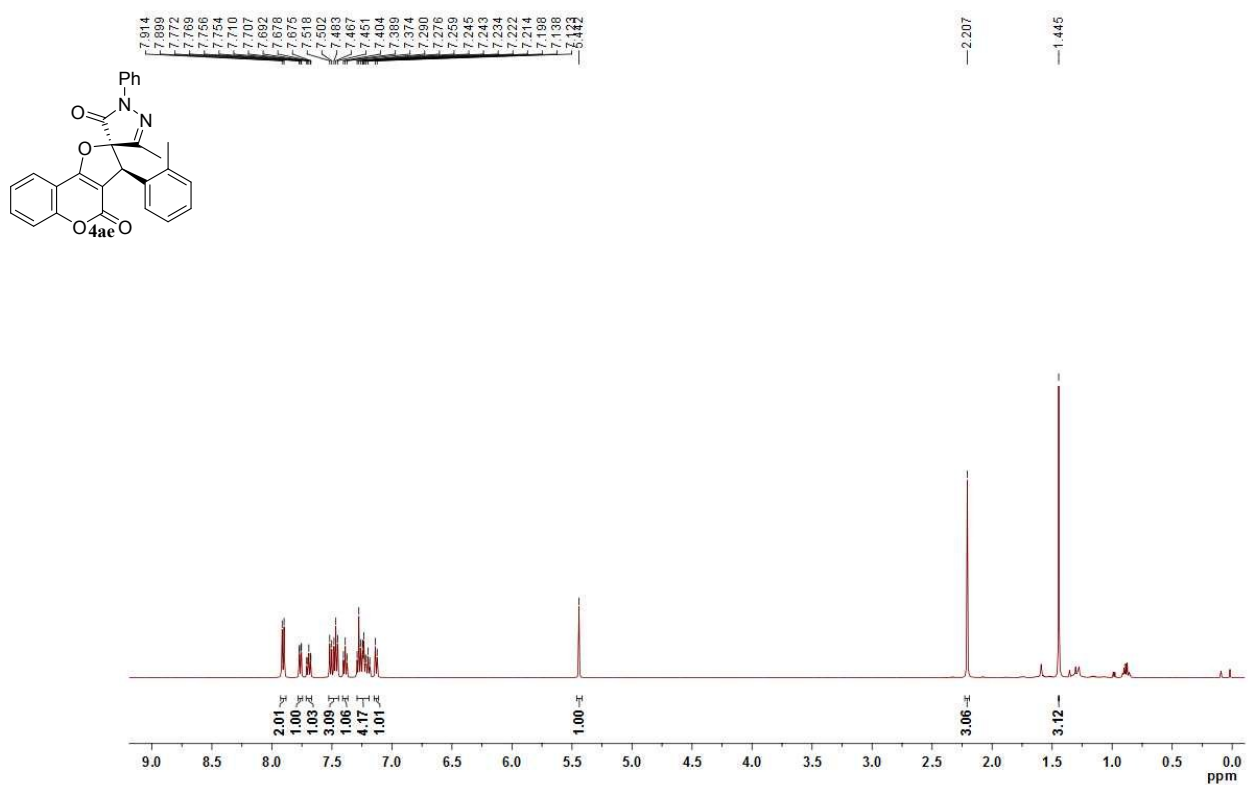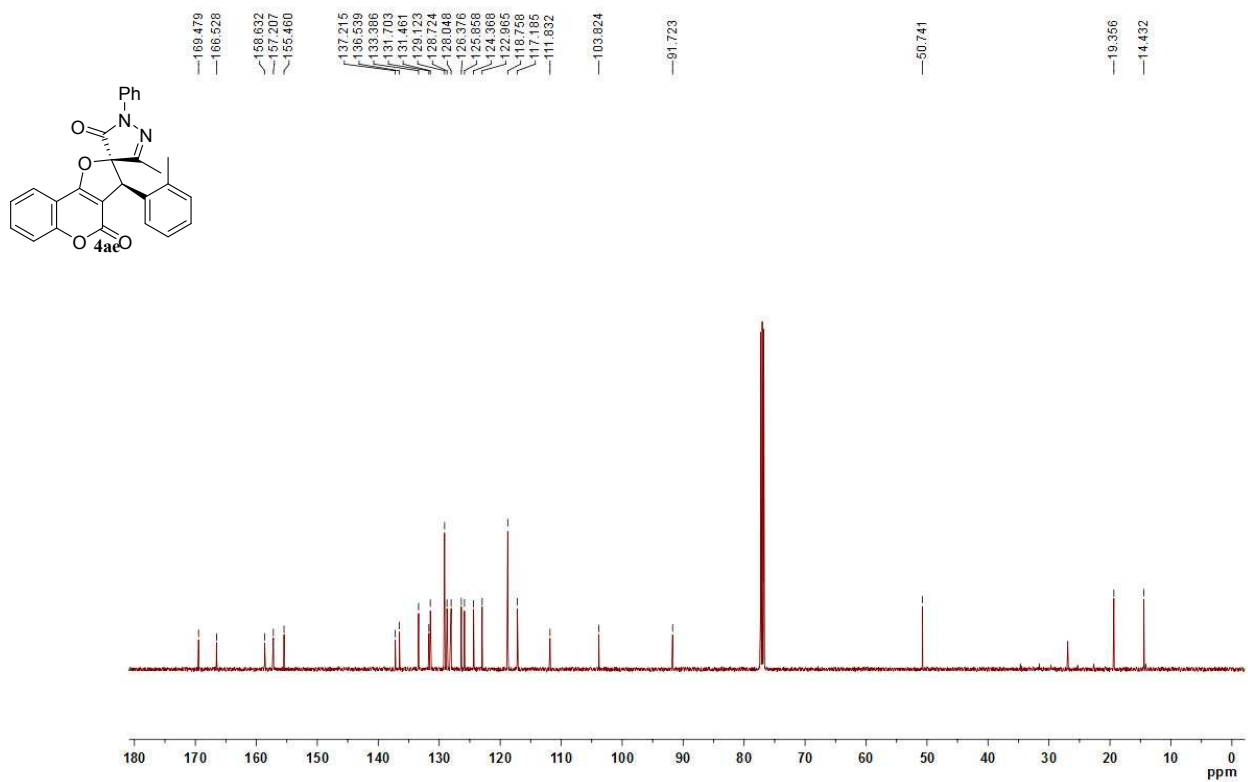

## HPLC chromatogram of 4ae (racemic)

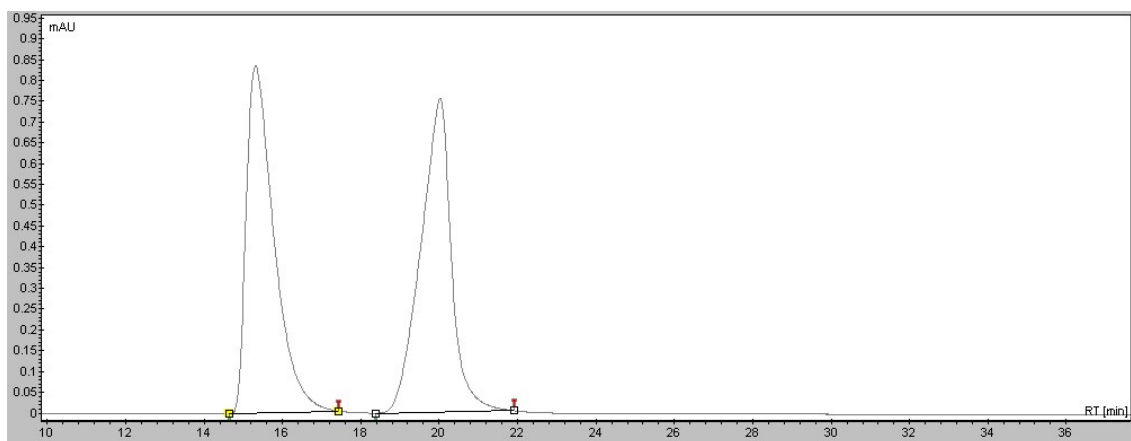

| # | Start time[min] | Time[min] | End time[min] | Area%  |
|---|-----------------|-----------|---------------|--------|
| 1 | 14.651          | 15.306    | 17.432        | 50.136 |
| 2 | 18.372          | 20.025    | 21.898        | 49.864 |

## HPLC chromatogram of 4ae (chiral)

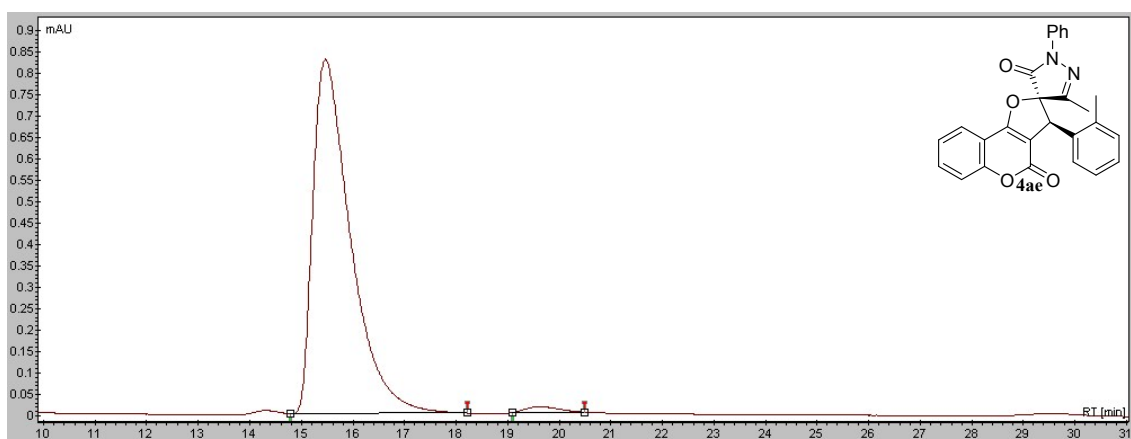

| # | Start time[min] | Time[min] | End time[min] | Area%  |
|---|-----------------|-----------|---------------|--------|
| 1 | 14.785          | 15.466    | 18.224        | 98.663 |
| 2 | 19.097          | 19.625    | 20.483        | 1.337  |



# <sup>1</sup>H NMR, <sup>13</sup>C NMR spectra of 4af

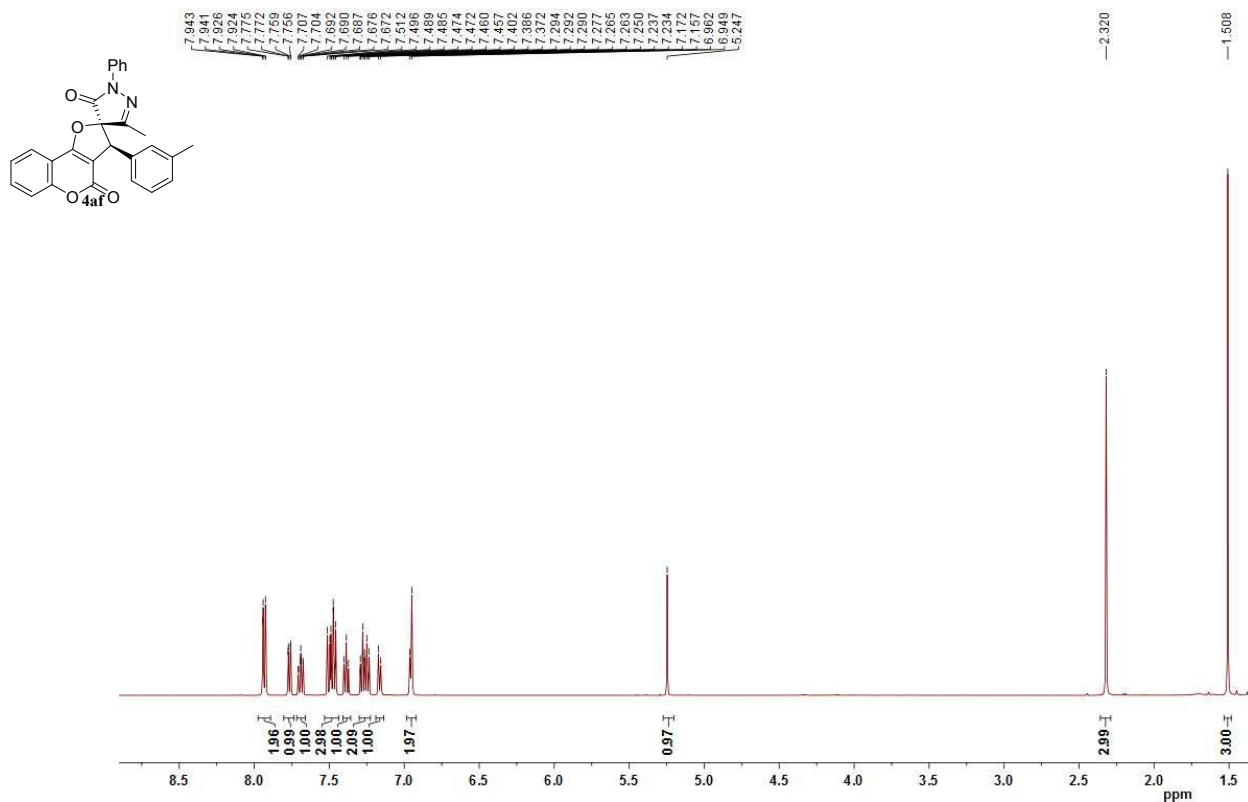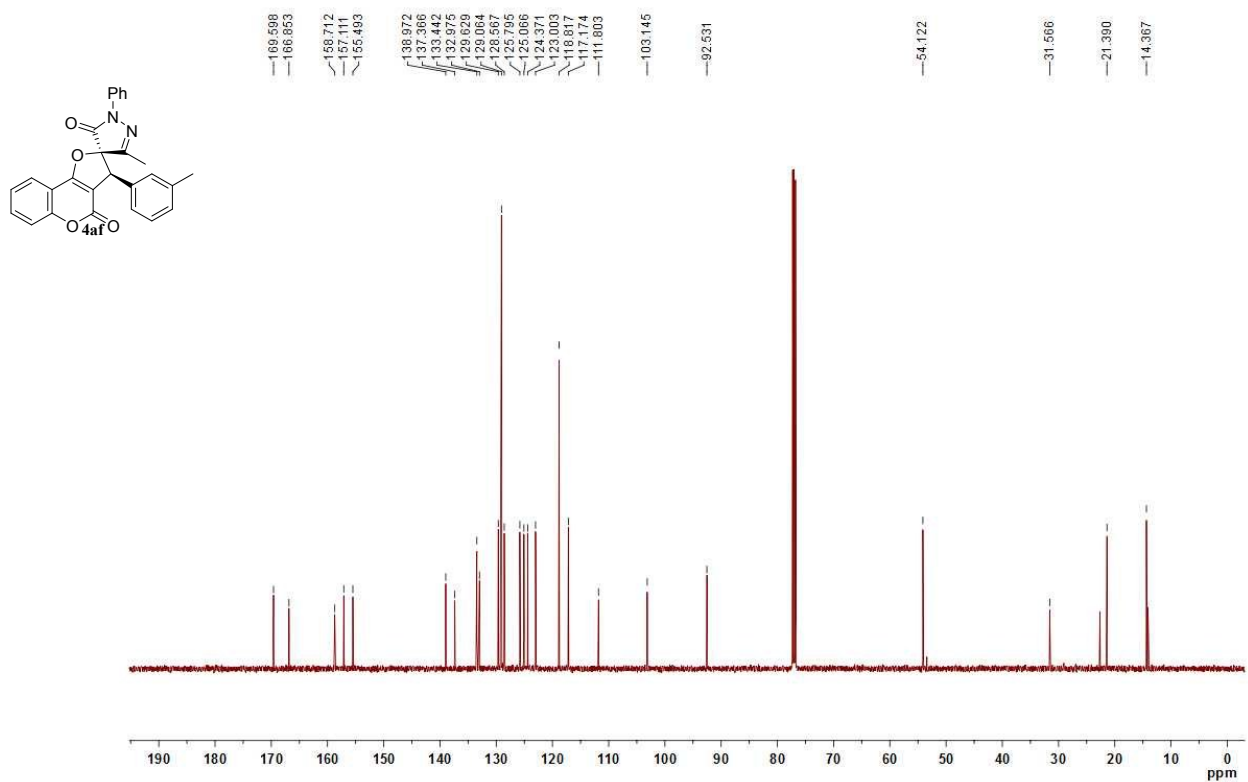

## HPLC chromatogram of 4af (racemic)

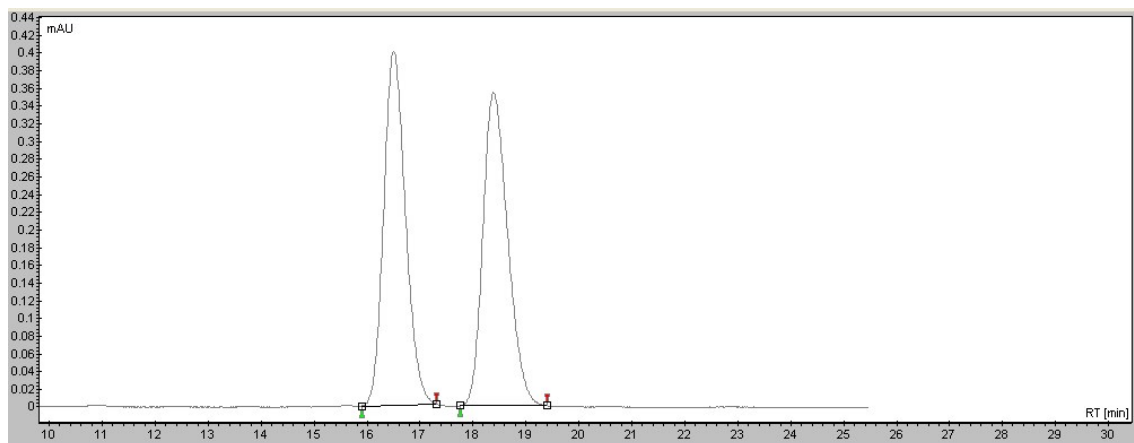

| # | Start [Min] | Time [Min] | End [Min] | Area % [%] |
|---|-------------|------------|-----------|------------|
| 1 | 15.899      | 16.505     | 17.32     | 49.85      |
| 2 | 17.768      | 18.385     | 19.4      | 50.15      |

## HPLC chromatogram of 4af (chiral)

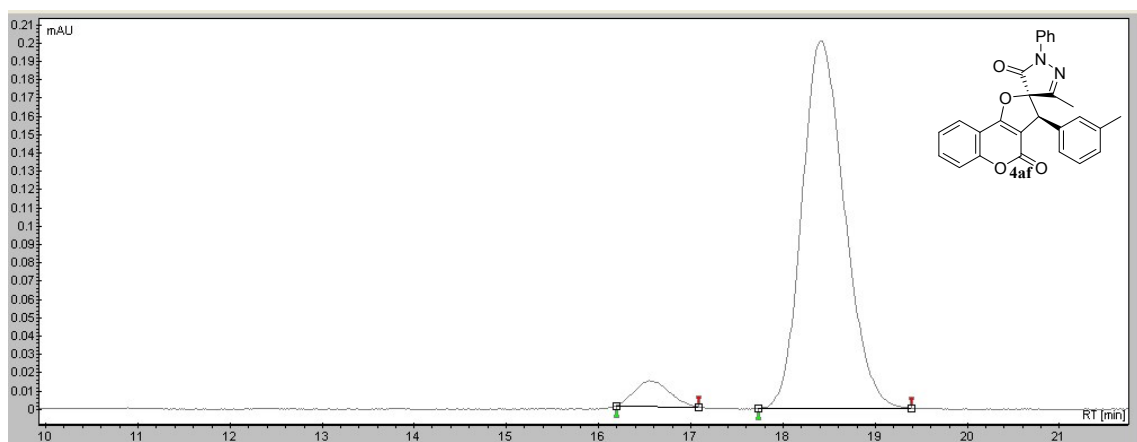

| # | Start [Min] | Time [Min] | End [Min] | Area % [%] |
|---|-------------|------------|-----------|------------|
| 1 | 16.194      | 16.572     | 17.085    | 5.374      |
| 2 | 17.733      | 18.412     | 19.394    | 94.626     |

# <sup>1</sup>H NMR, <sup>13</sup>C NMR spectra of 4ag

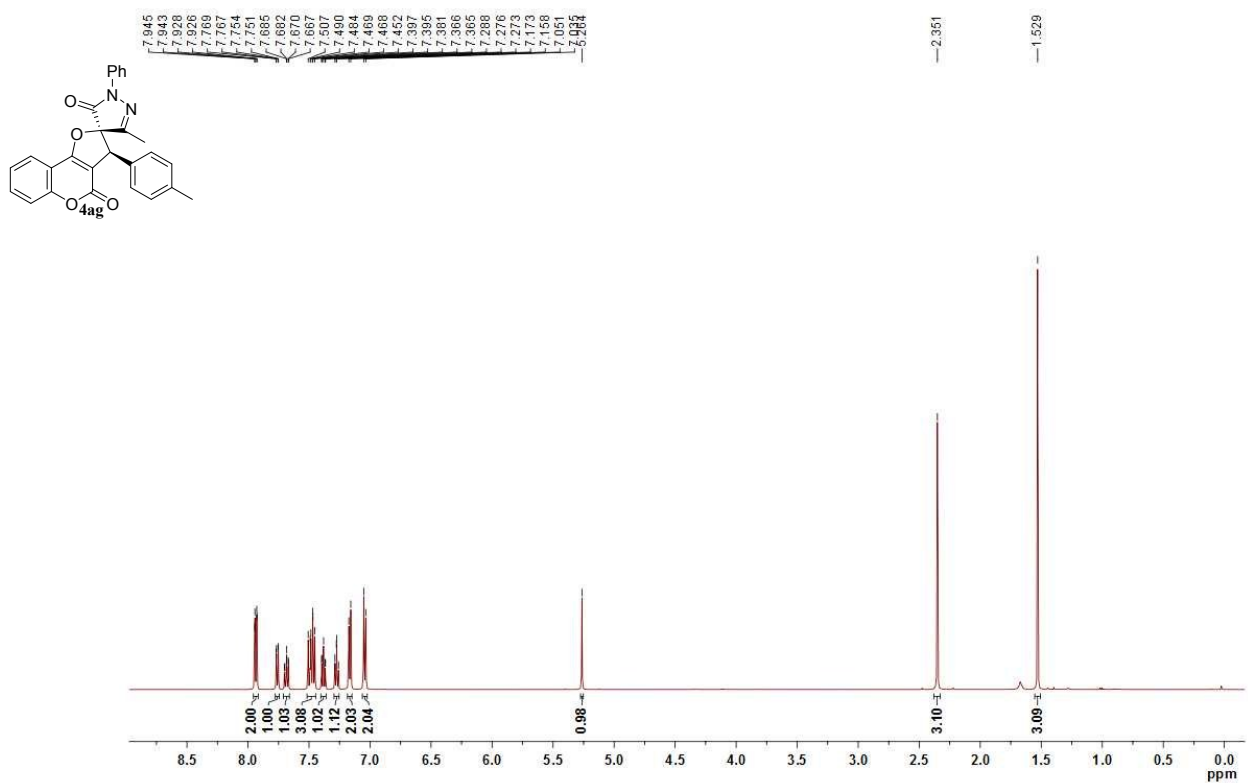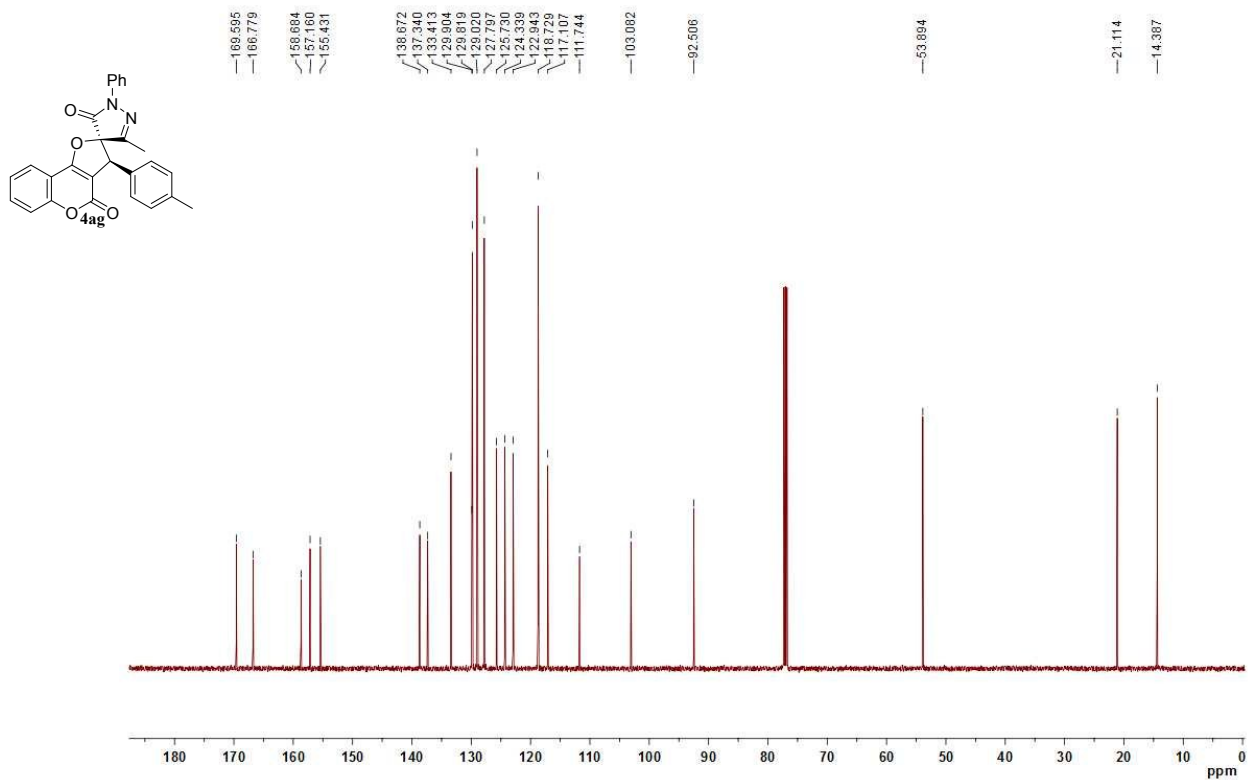

## HPLC chromatogram of 4ag (racemic)

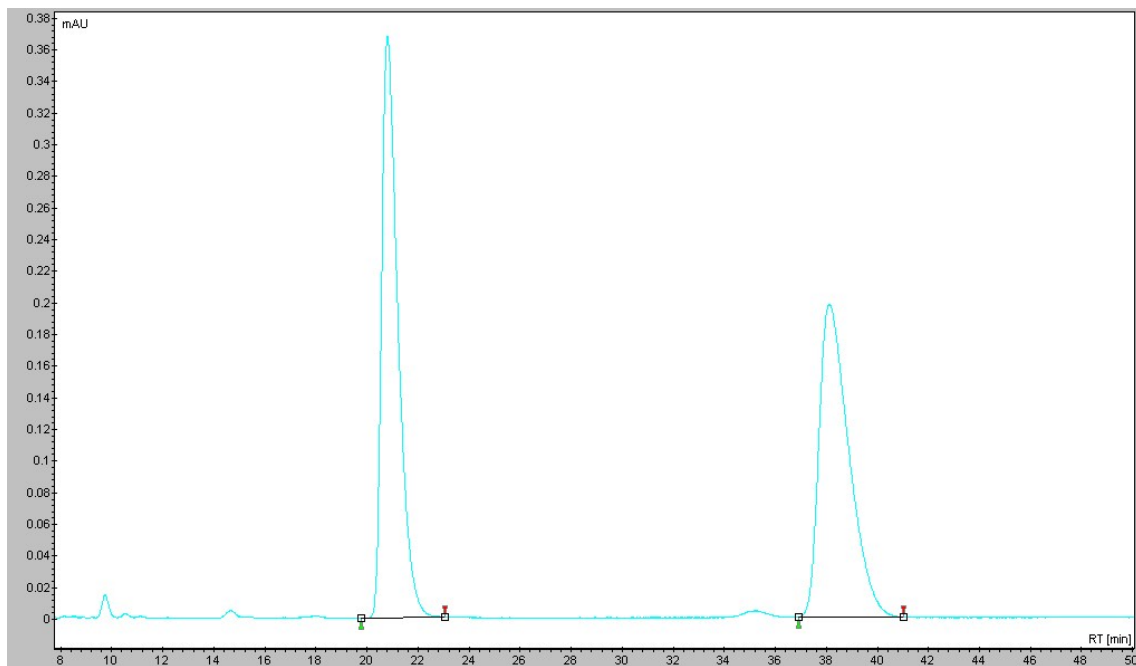

| # | Start time[min] | Time[min] | End time[min] | Area%  |
|---|-----------------|-----------|---------------|--------|
| 1 | 19.797          | 20.798    | 23.066        | 50.594 |
| 2 | 36.918          | 38.117    | 41.020        | 49.406 |

## HPLC chromatogram of 4ag (chiral)

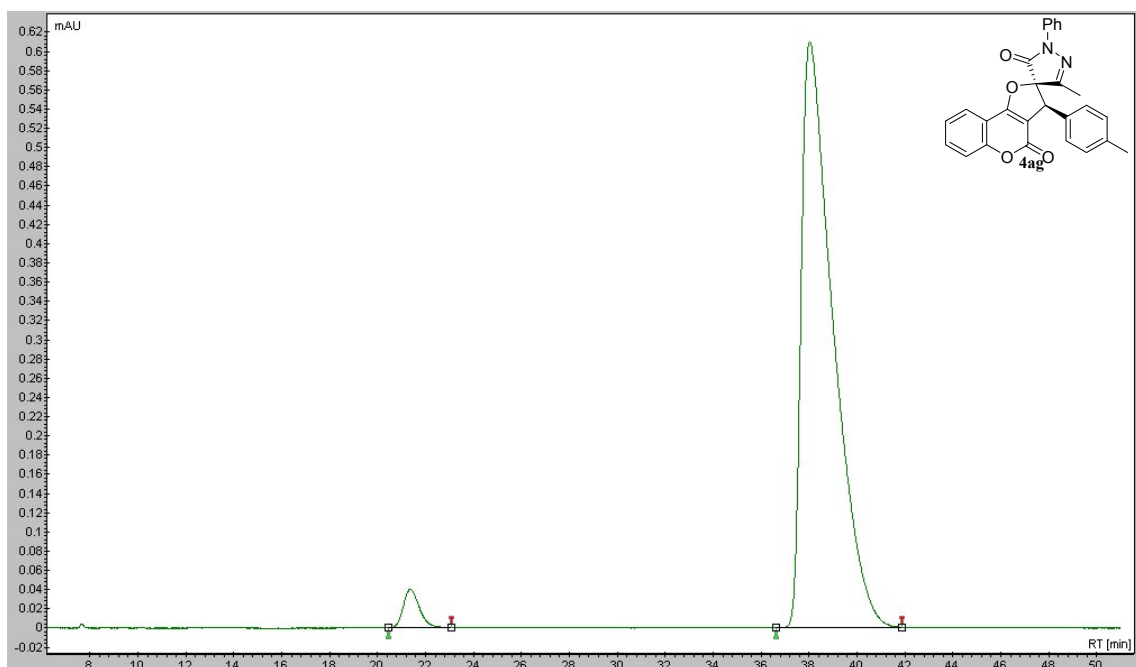

| # | Start time[min] | Time[min] | End time[min] | Area%  |
|---|-----------------|-----------|---------------|--------|
| 1 | 20.447          | 21.357    | 23.082        | 3.183  |
| 2 | 36.626          | 38.024    | 41.896        | 96.817 |

# <sup>1</sup>H NMR, <sup>13</sup>C NMR spectra of 4ah

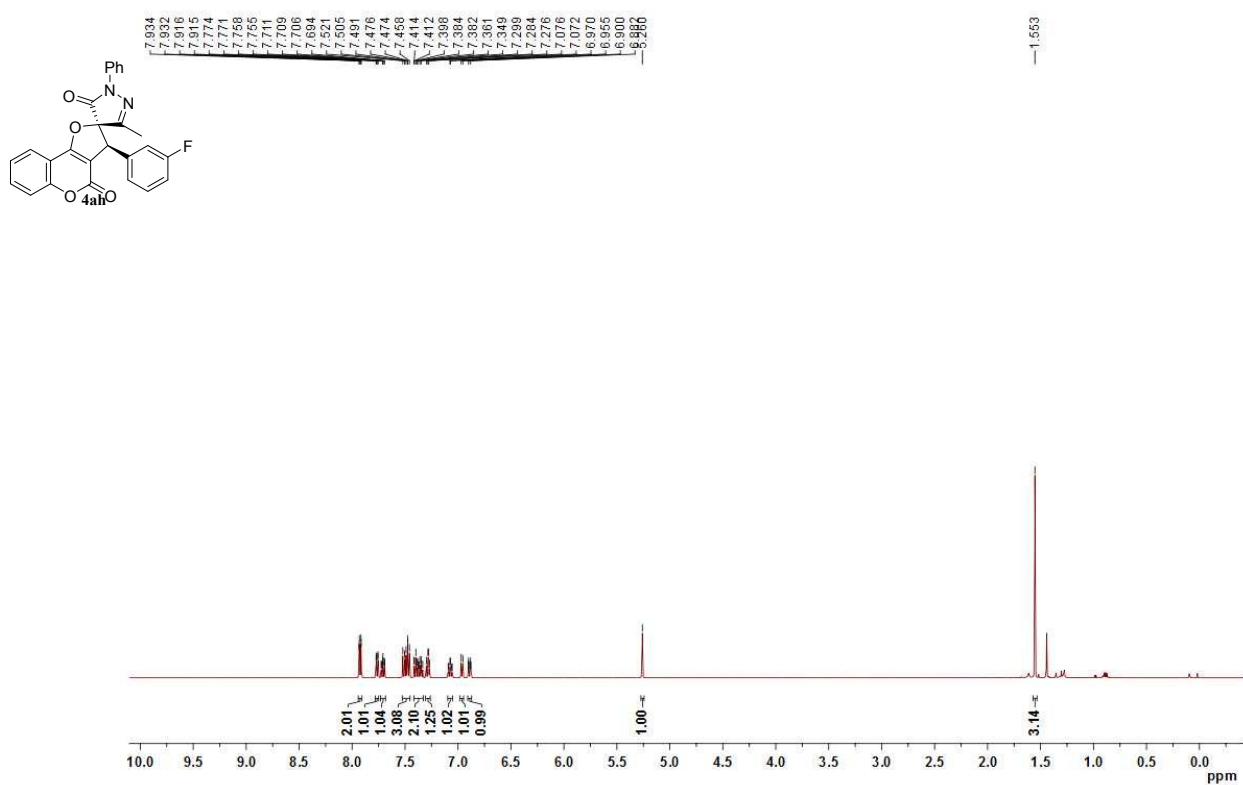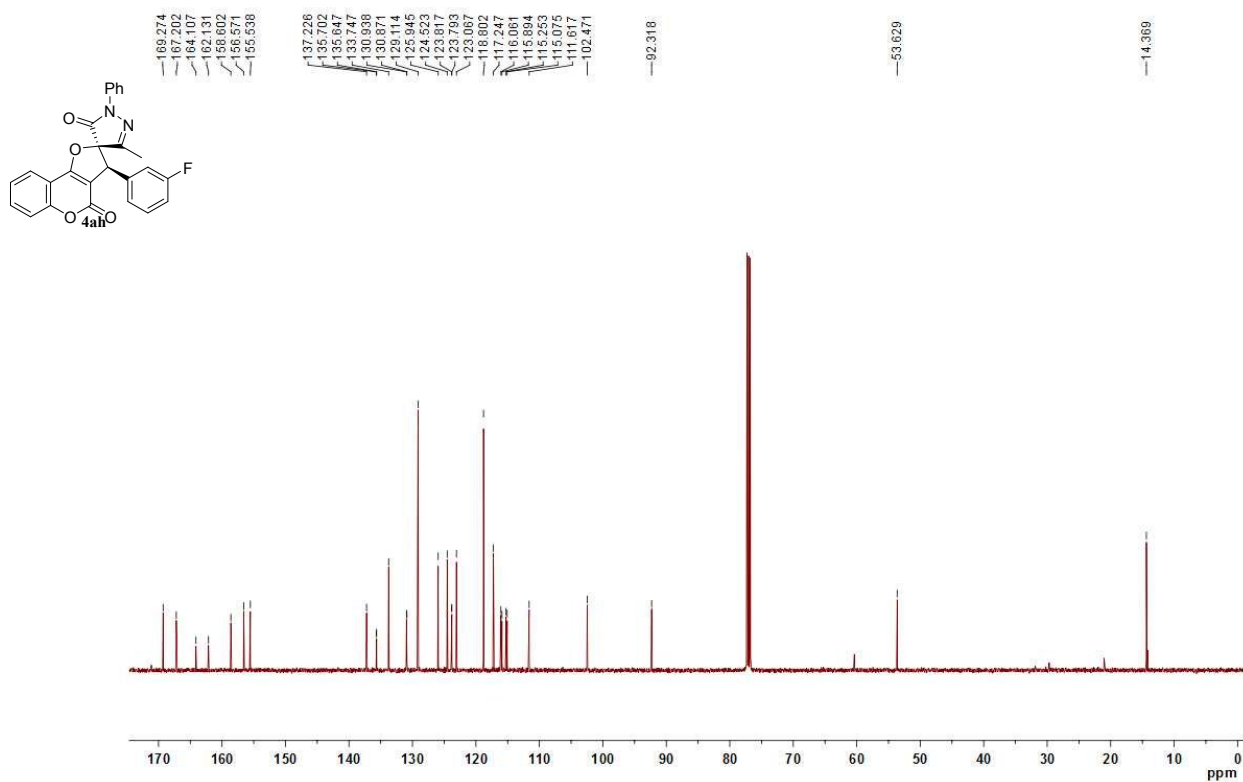

### HPLC chromatogram of 4ah (racemic)

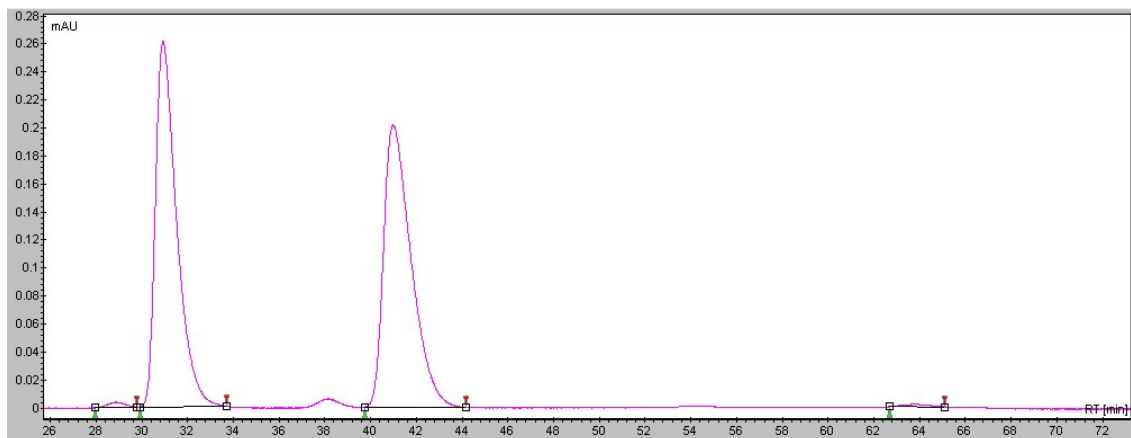

| # | Start time[min] | Time[min] | End time[min] | Area%  |
|---|-----------------|-----------|---------------|--------|
| 1 | 27.937          | 28.856    | 29.781        | 0.542  |
| 2 | 29.918          | 30.922    | 33.687        | 49.46  |
| 3 | 39.74           | 40.985    | 44.169        | 49.578 |
| 4 | 62.67           | 63.817    | 65.106        | 0.42   |

### HPLC chromatogram of 4ah (chiral)

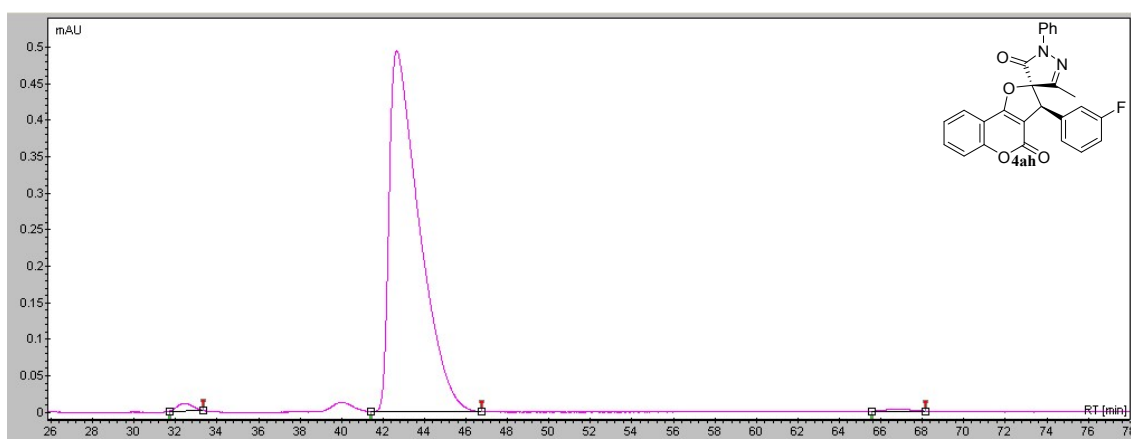

| # | Start [Min] | Time [Min] | End [Min] | Area % [%] |
|---|-------------|------------|-----------|------------|
| 1 | 31.692      | 32.415     | 33.345    | 1.07       |
| 2 | 41.429      | 42.678     | 46.756    | 98.443     |
| 3 | 65.588      | 66.829     | 68.16     | 0.487      |

# <sup>1</sup>H NMR, <sup>13</sup>C NMR spectra of 4ai

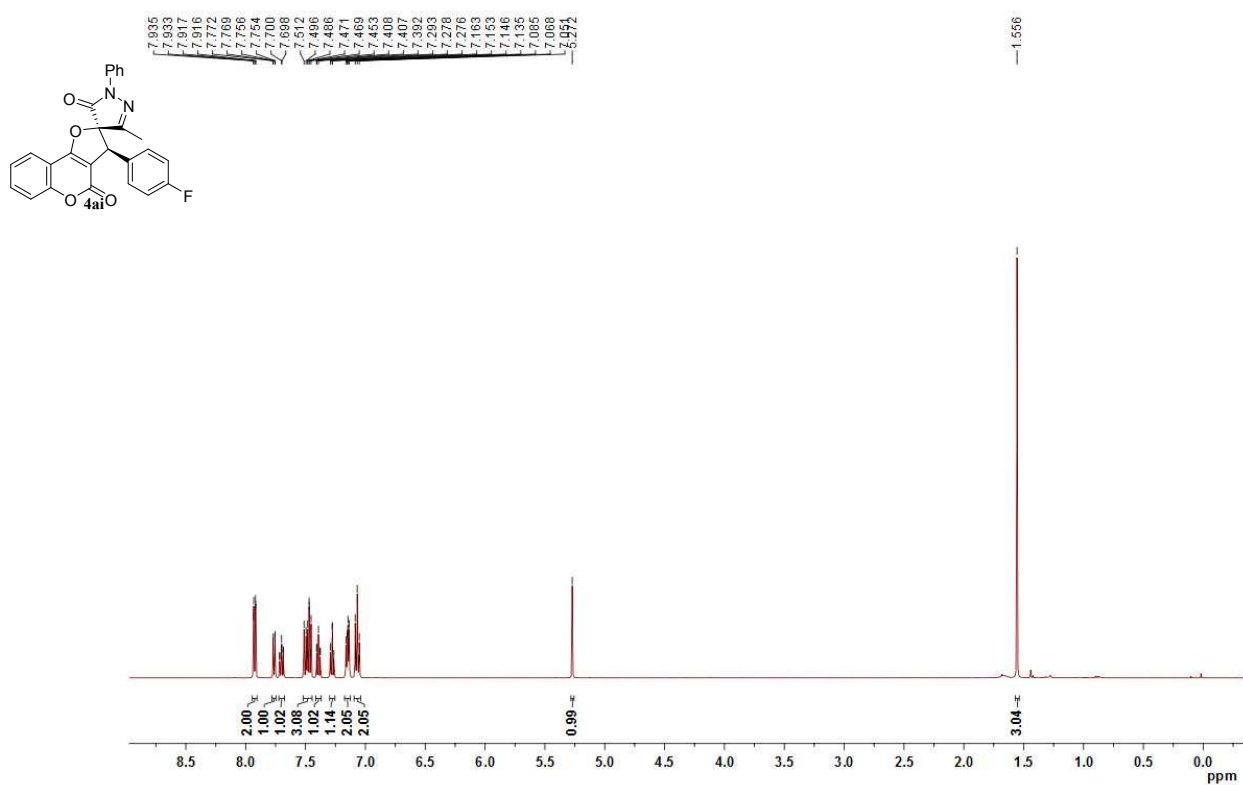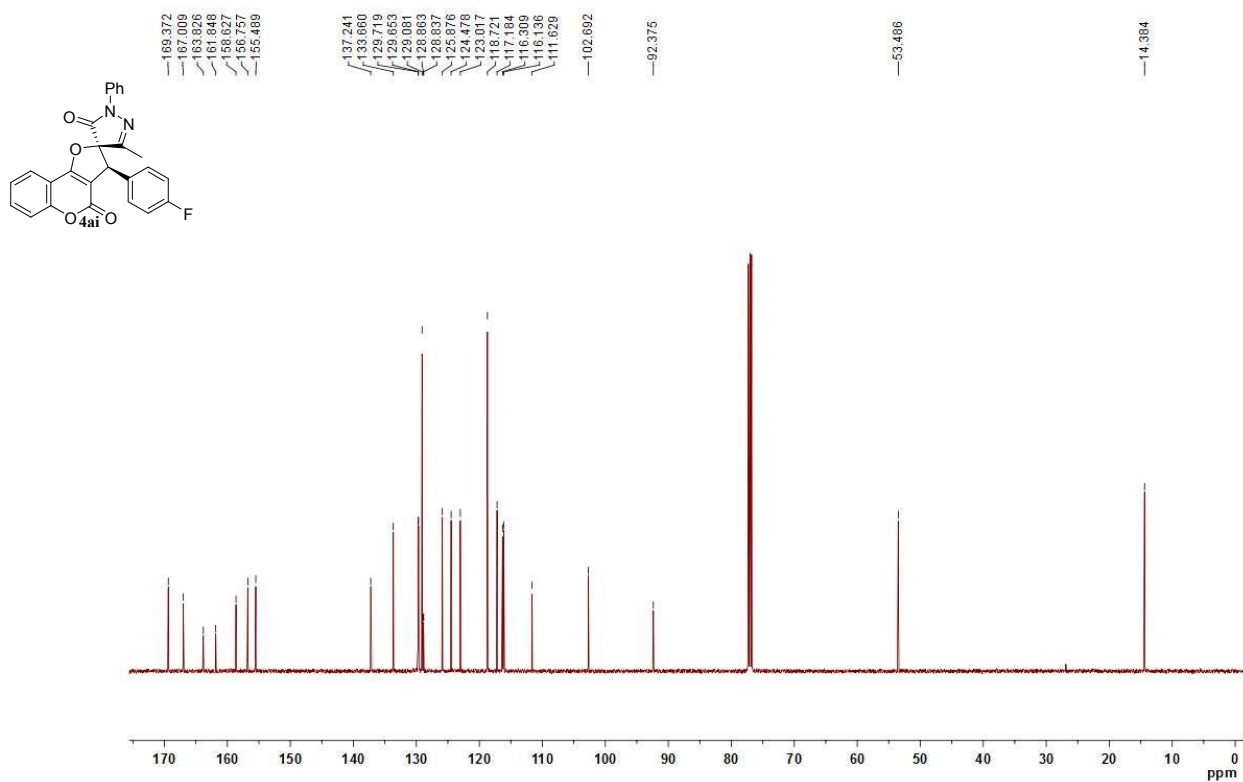

### HPLC chromatogram of 4ai (racemic)

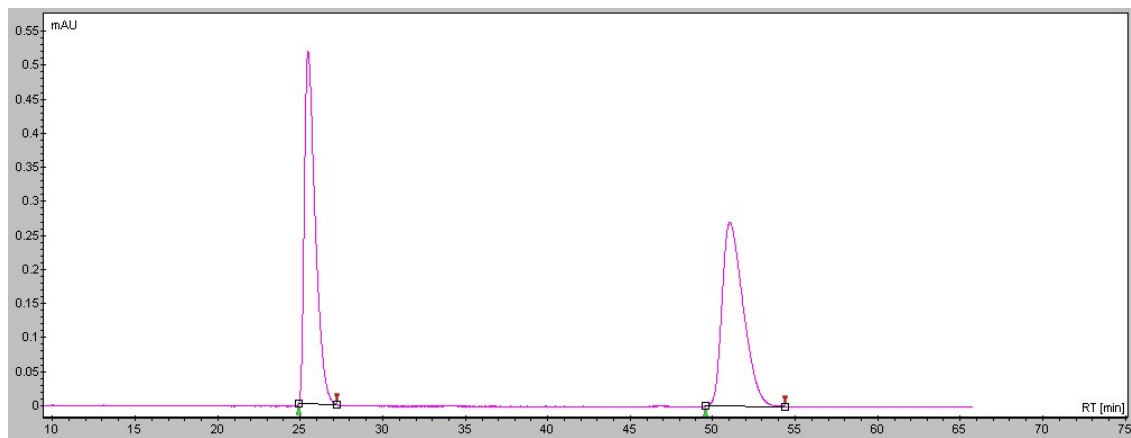

| # | Start [Min] | Time [Min] | End [Min] | Area % [%] |
|---|-------------|------------|-----------|------------|
| 1 | 24.917      | 25.471     | 27.225    | 49.635     |
| 2 | 49.562      | 51.035     | 54.382    | 50.365     |

### HPLC chromatogram of 4ai (chiral)

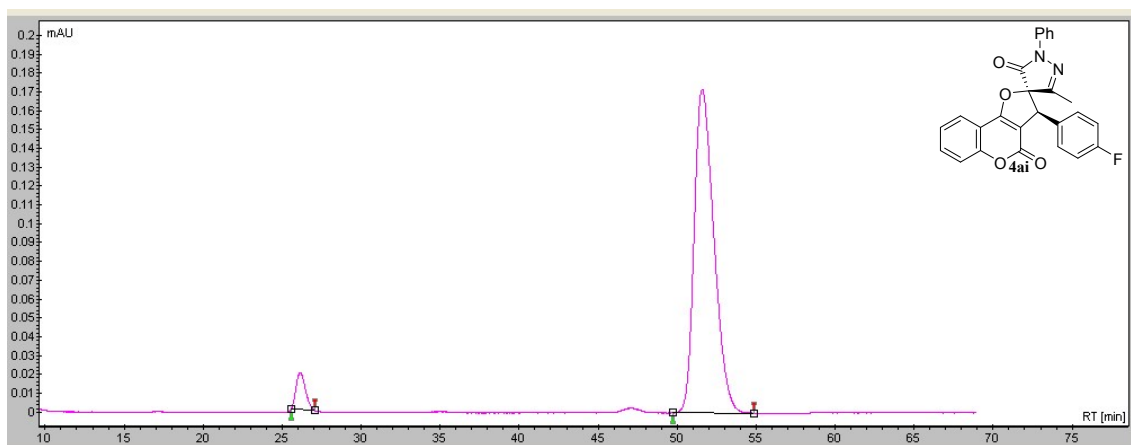

| # | Start [Min] | Time [Min] | End [Min] | Area % [%] |
|---|-------------|------------|-----------|------------|
| 1 | 25.58       | 26.137     | 27.076    | 5.125      |
| 2 | 49.735      | 51.581     | 54.865    | 94.875     |



# <sup>1</sup>H NMR, <sup>13</sup>C NMR spectra of 4aj

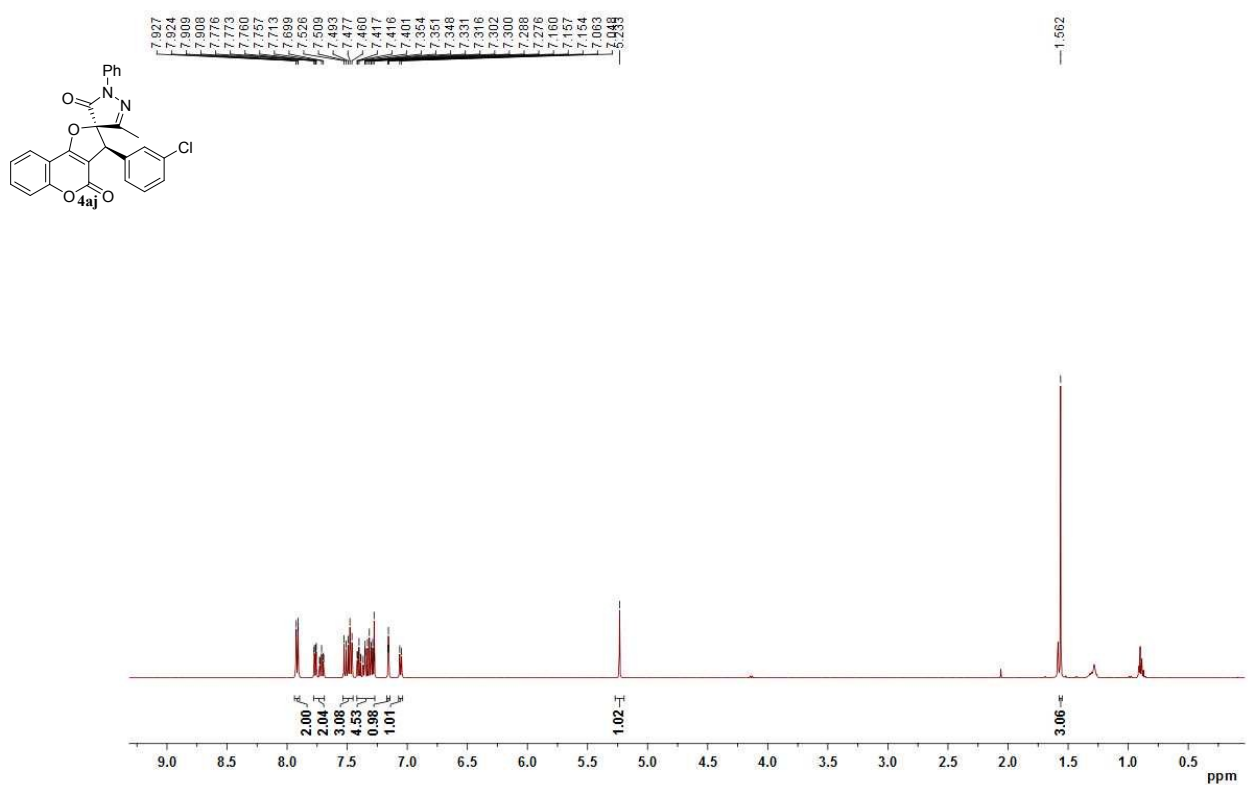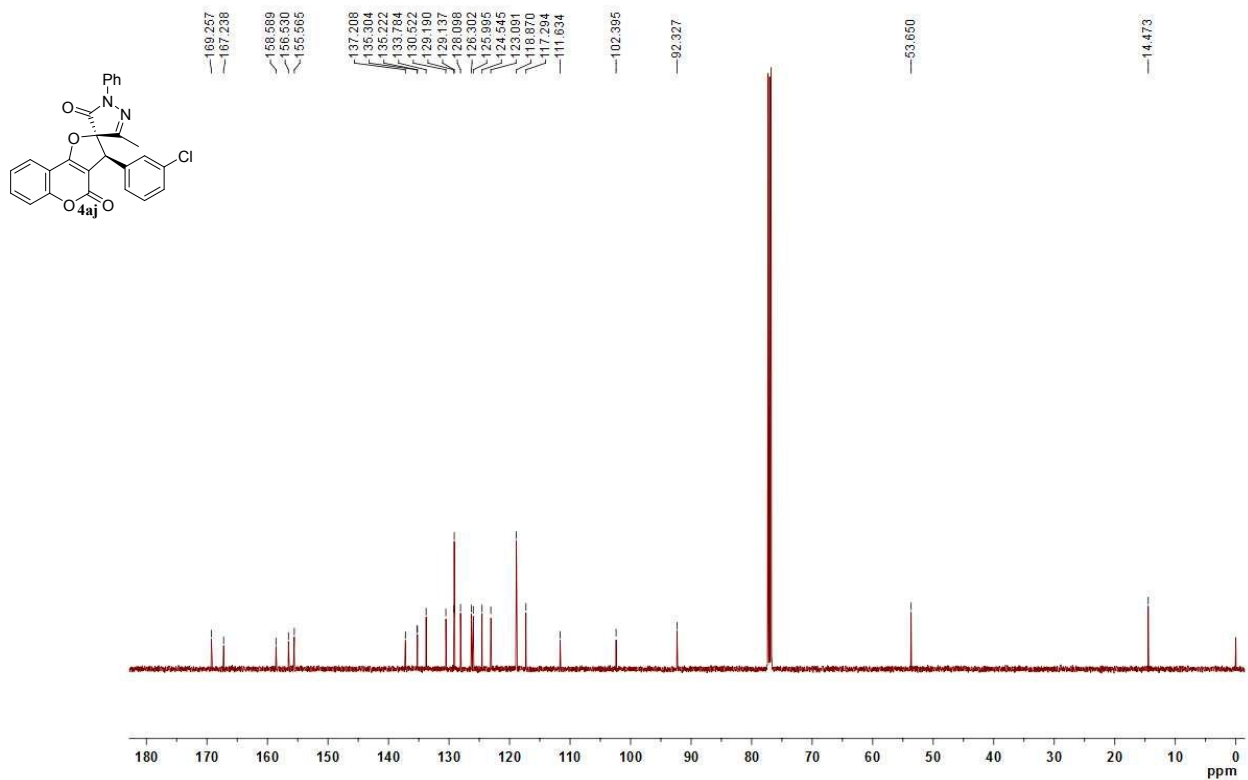

## HPLC chromatogram of 4aj (racemic)

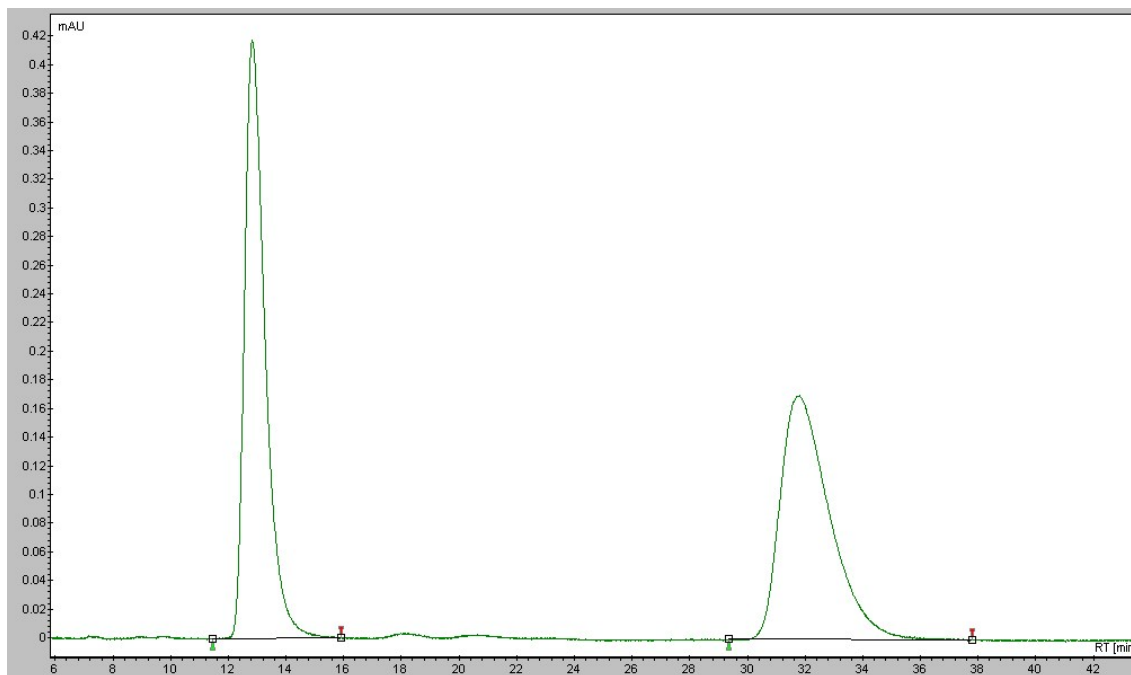

| # | Start time[min] | Time[min] | End time[min] | Area%  |
|---|-----------------|-----------|---------------|--------|
| 1 | 11.462          | 12.839    | 15.897        | 50.536 |
| 2 | 29.353          | 31.784    | 37.775        | 49.464 |

## HPLC chromatogram of 4aj (chiral)

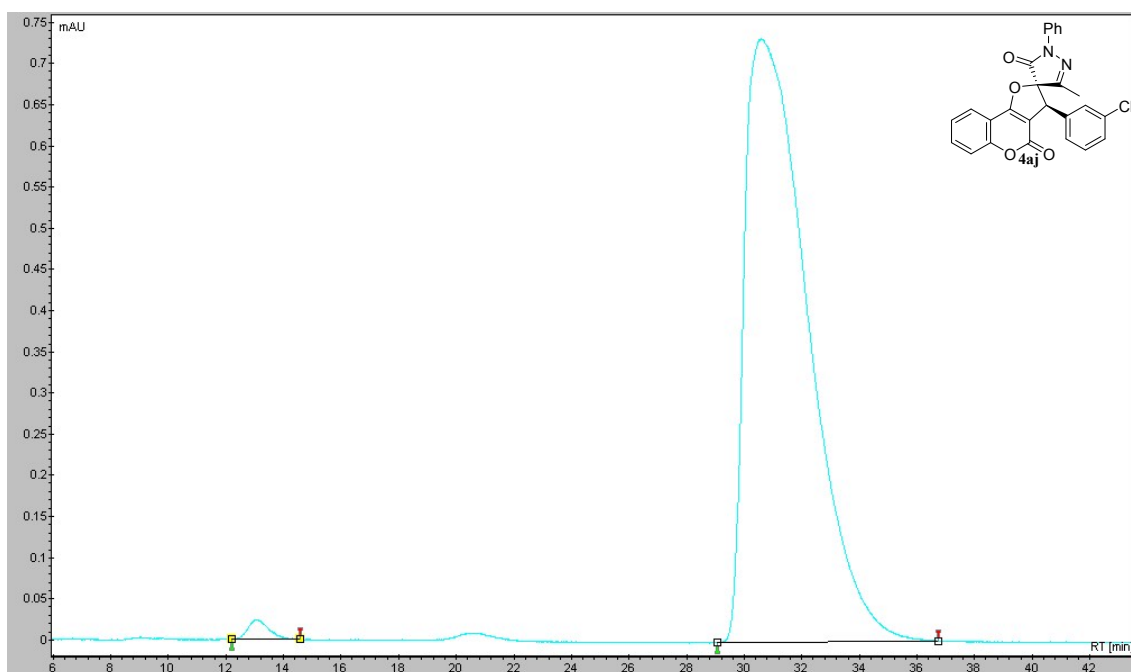

| # | Start time[min] | Time[min] | End time[min] | Area%  |
|---|-----------------|-----------|---------------|--------|
| 1 | 12.207          | 13.066    | 14.581        | 1.072  |
| 2 | 29.049          | 30.598    | 36.735        | 98.928 |

# <sup>1</sup>H NMR, <sup>13</sup>C NMR spectra of 4ak

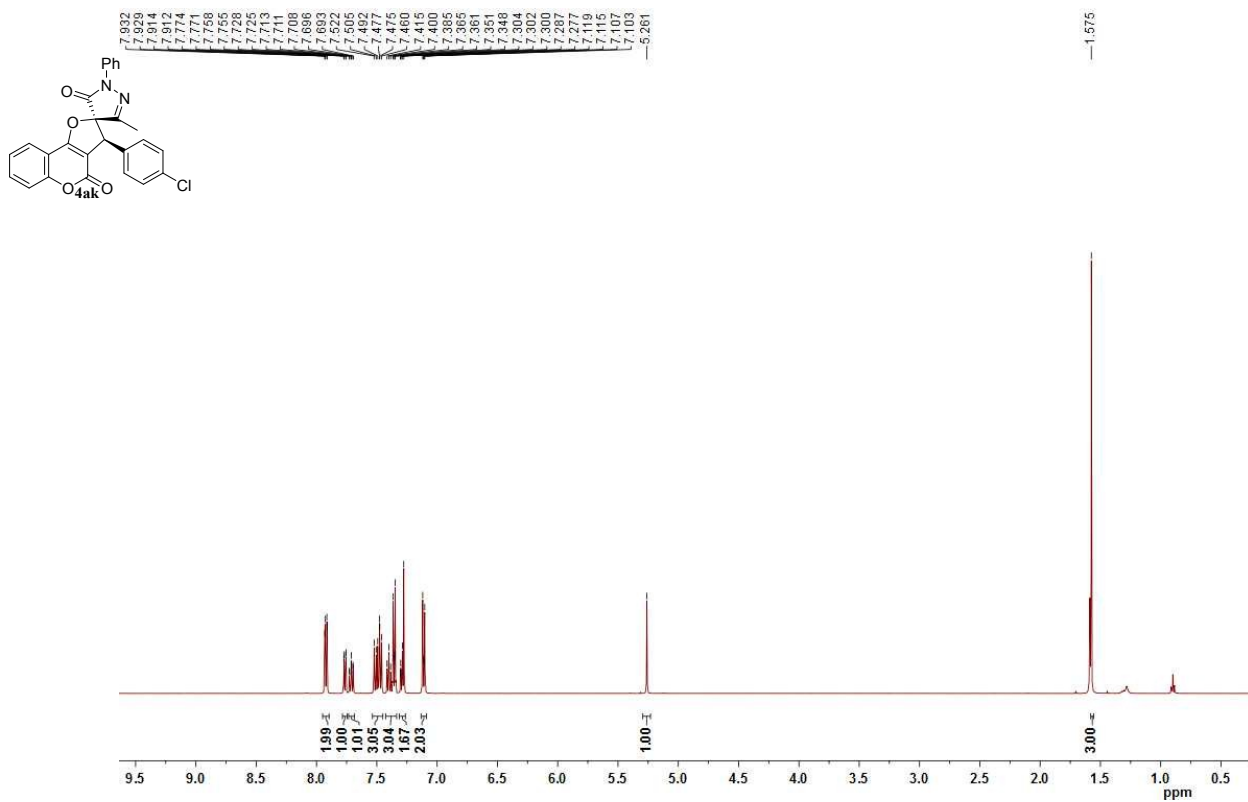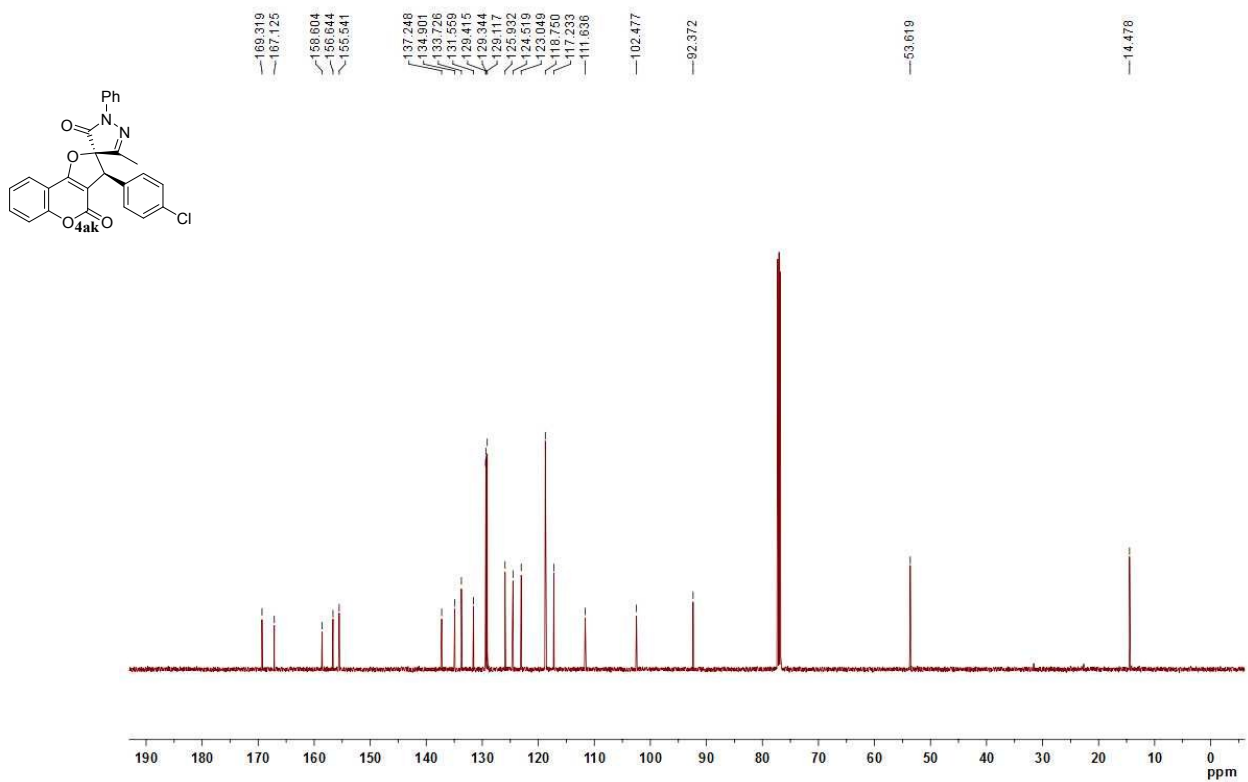

## HPLC chromatogram of 4ak (racemic)

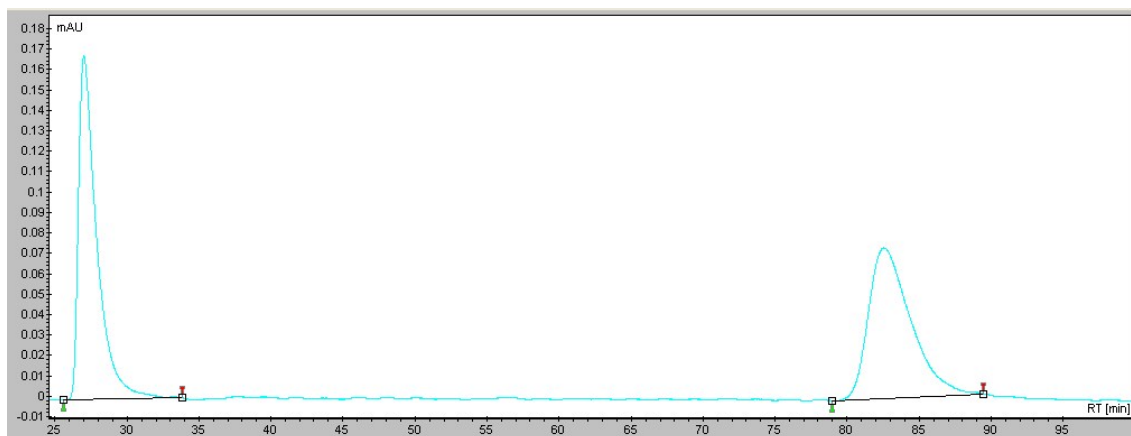

| # | Start [Min] | Time [Min] | End [Min] | Area % [%] |
|---|-------------|------------|-----------|------------|
| 1 | 25.145      | 28.821     | 34.474    | 49.78      |
| 2 | 79.281      | 83.533     | 89.572    | 51.22      |

## HPLC chromatogram of 4ak (chiral)

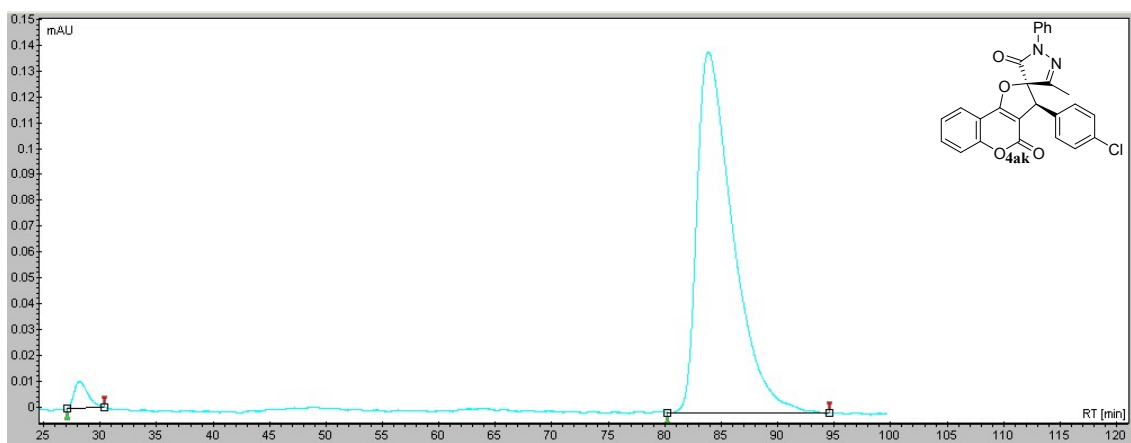

| # | Start [Min] | Time [Min] | End [Min] | Area % [%] |
|---|-------------|------------|-----------|------------|
| 1 | 27.115      | 28.177     | 30.414    | 2.767      |
| 2 | 80.211      | 83.863     | 94.542    | 97.233     |

# $^1\text{H}$ NMR, $^{13}\text{C}$ NMR spectra of 4al

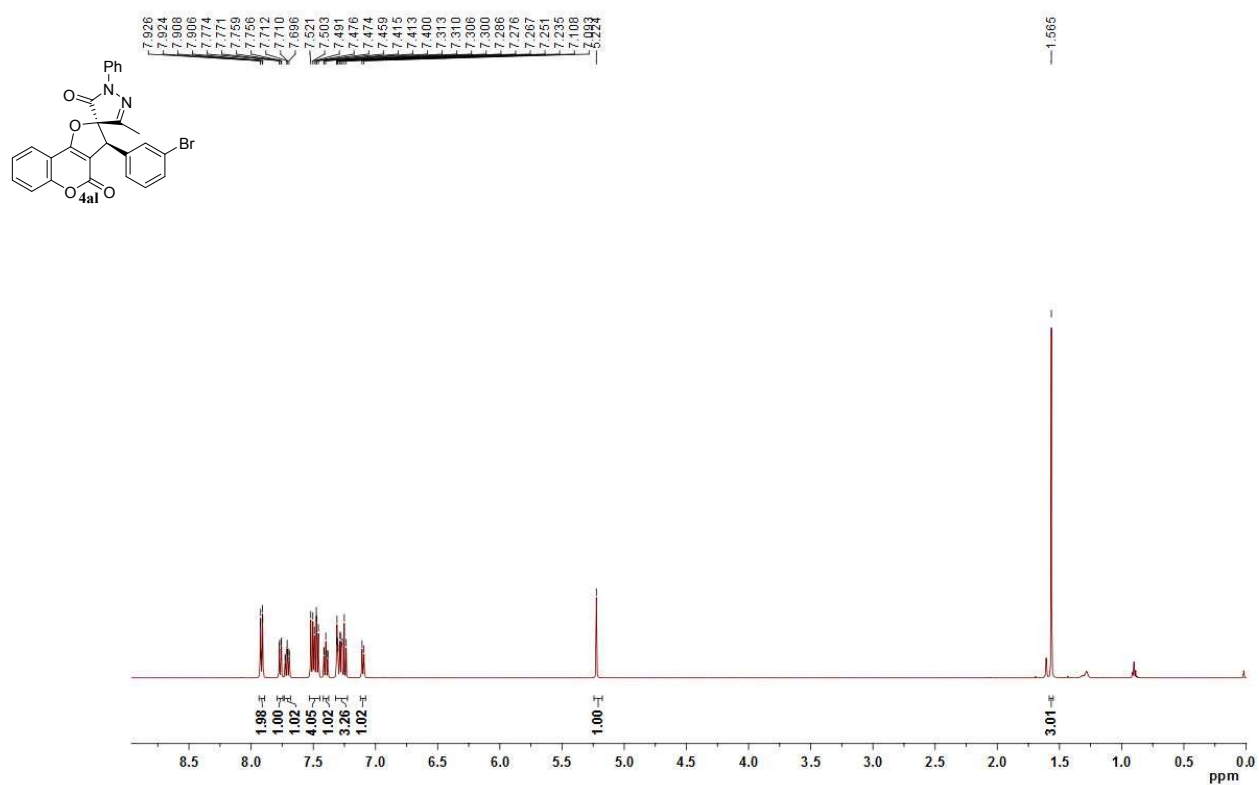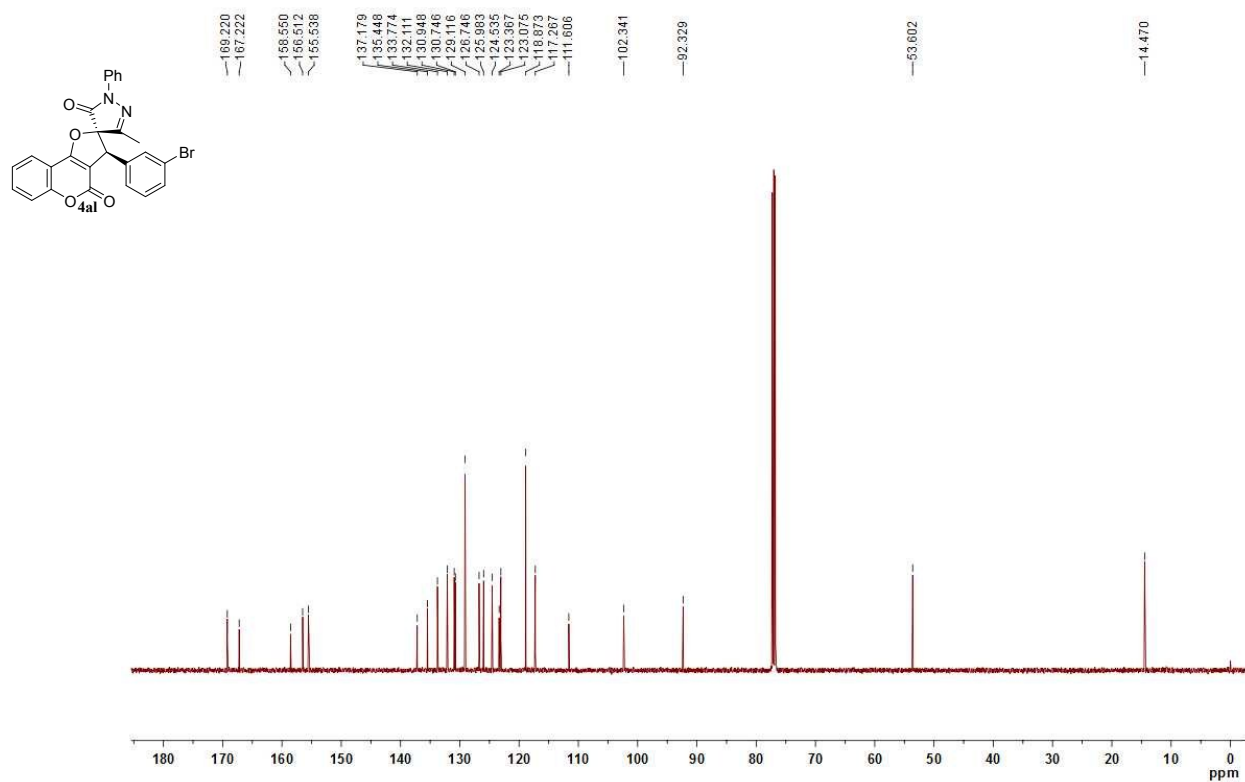

## HPLC chromatogram of 4al (racemic)

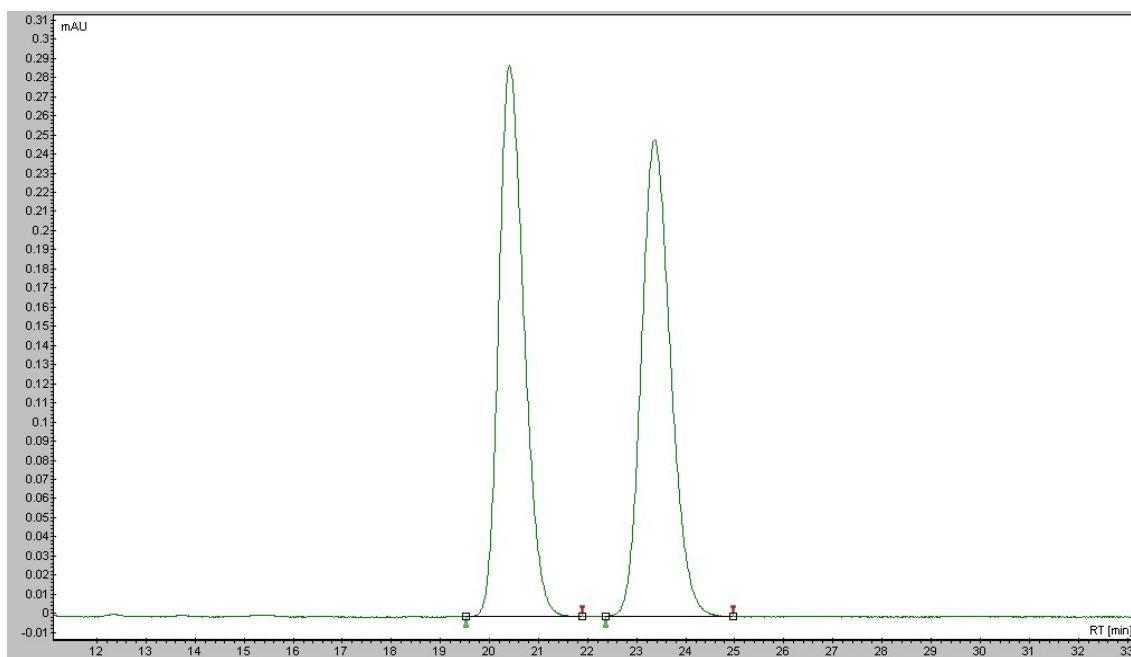

| # | Start time[min] | Time[min] | End time[min] | Area%  |
|---|-----------------|-----------|---------------|--------|
| 1 | 19.524          | 20.412    | 21.881        | 49.979 |
| 2 | 22.374          | 23.372    | 24.977        | 50.021 |

## HPLC chromatogram of 4al (chiral)

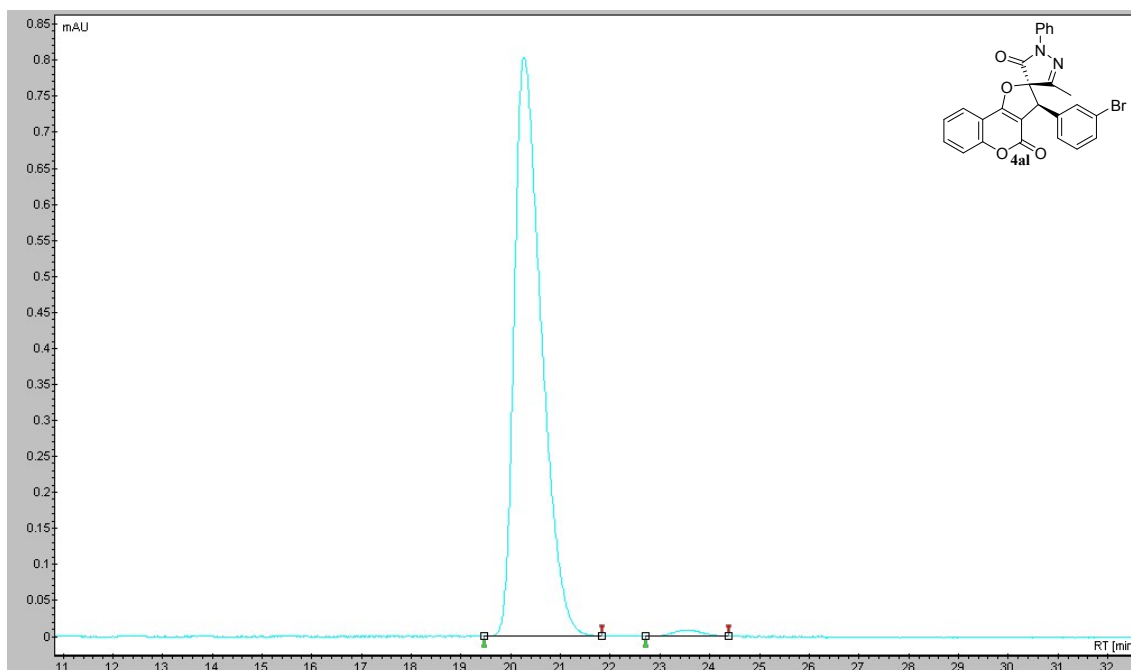

| # | Start time[min] | Time[min] | End time[min] | Area%  |
|---|-----------------|-----------|---------------|--------|
| 1 | 19.464          | 20.265    | 21.825        | 98.803 |
| 2 | 22.702          | 23.545    | 24.389        | 1.197  |

# <sup>1</sup>H NMR, <sup>13</sup>C NMR spectra of 4am

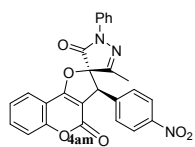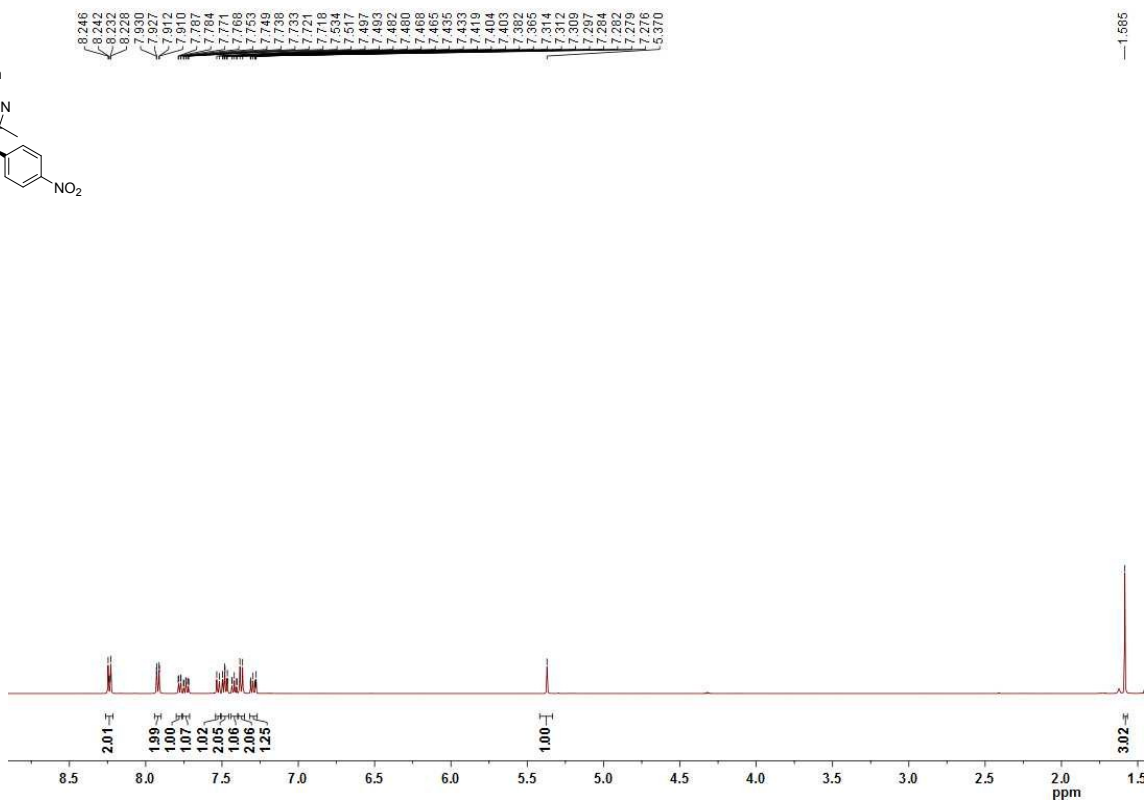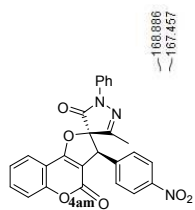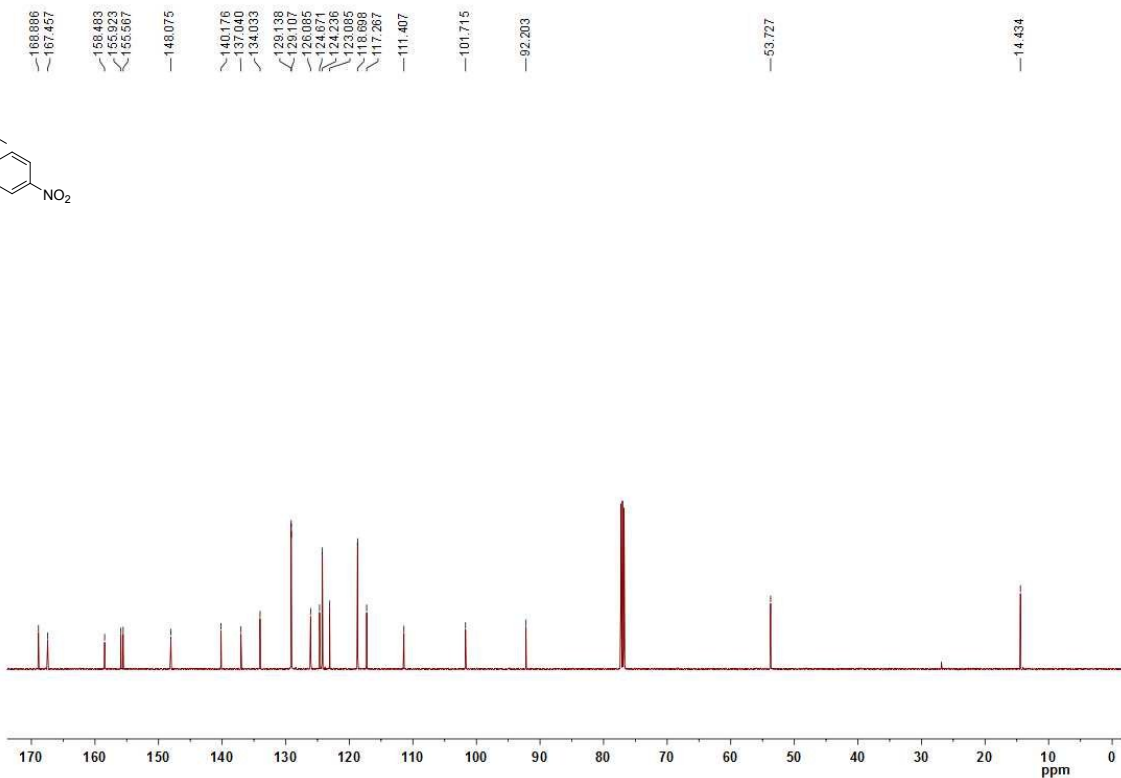

### HPLC chromatogram of 4am (racemic)

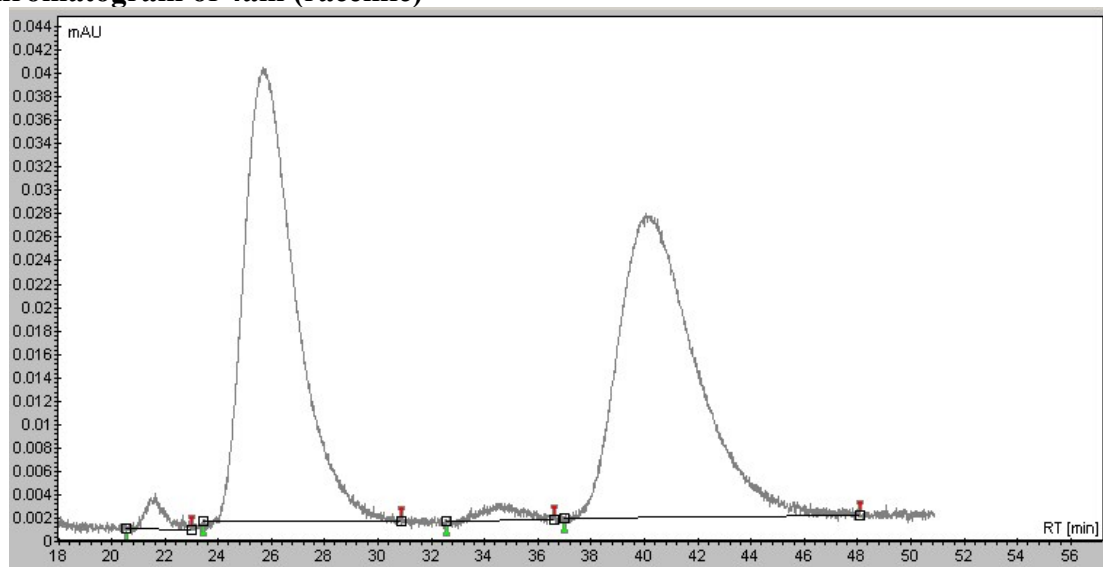

| # | Start time[min] | Time[min] | End time[min] | Area%  |
|---|-----------------|-----------|---------------|--------|
| 1 | 20.545          | 21.598    | 23.025        | 1.275  |
| 2 | 23.45           | 25.705    | 30.888        | 48.608 |
| 3 | 32.589          | 34.637    | 36.627        | 1.143  |
| 4 | 36.981          | 40.104    | 48.104        | 48.974 |

### HPLC chromatogram of 4am (chiral)

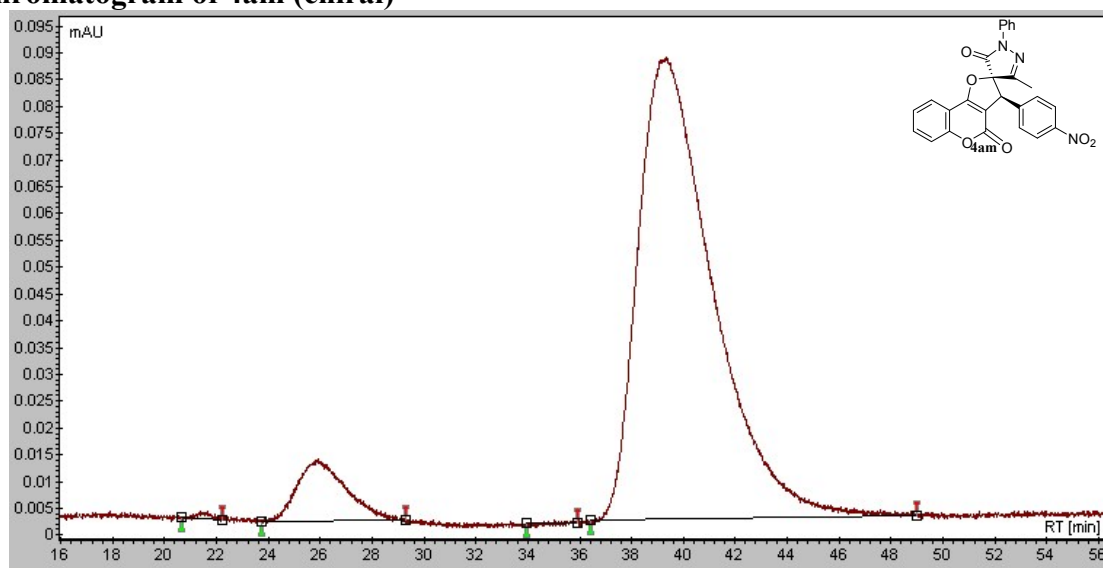

| # | Start time[min] | Time[min] | End time[min] | Area%  |
|---|-----------------|-----------|---------------|--------|
| 1 | 20.672          | 21.598    | 22.237        | 0.214  |
| 2 | 23.719          | 25.865    | 29.32         | 7.956  |
| 3 | 33.932          | 33.944    | 35.908        | 0.075  |
| 4 | 36.402          | 39.264    | 49.003        | 91.755 |



# <sup>1</sup>H NMR, <sup>13</sup>C NMR spectra of 4an

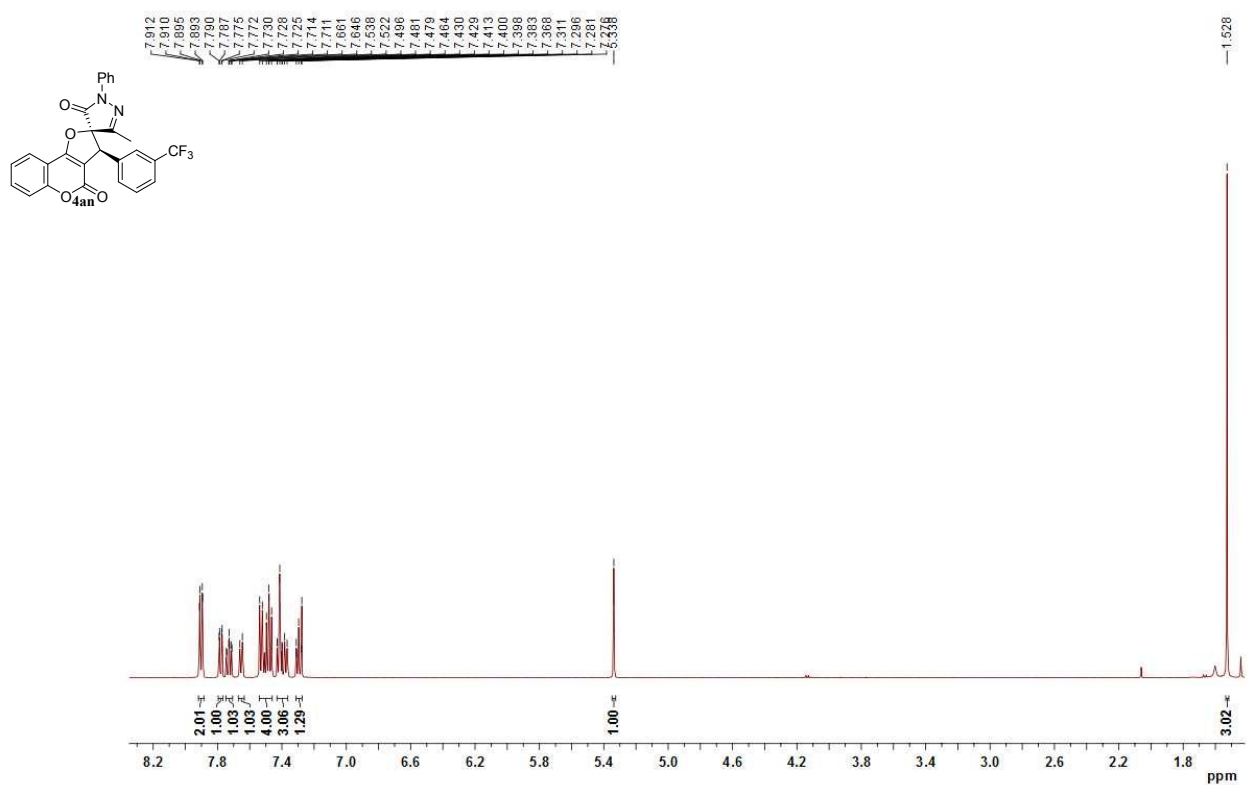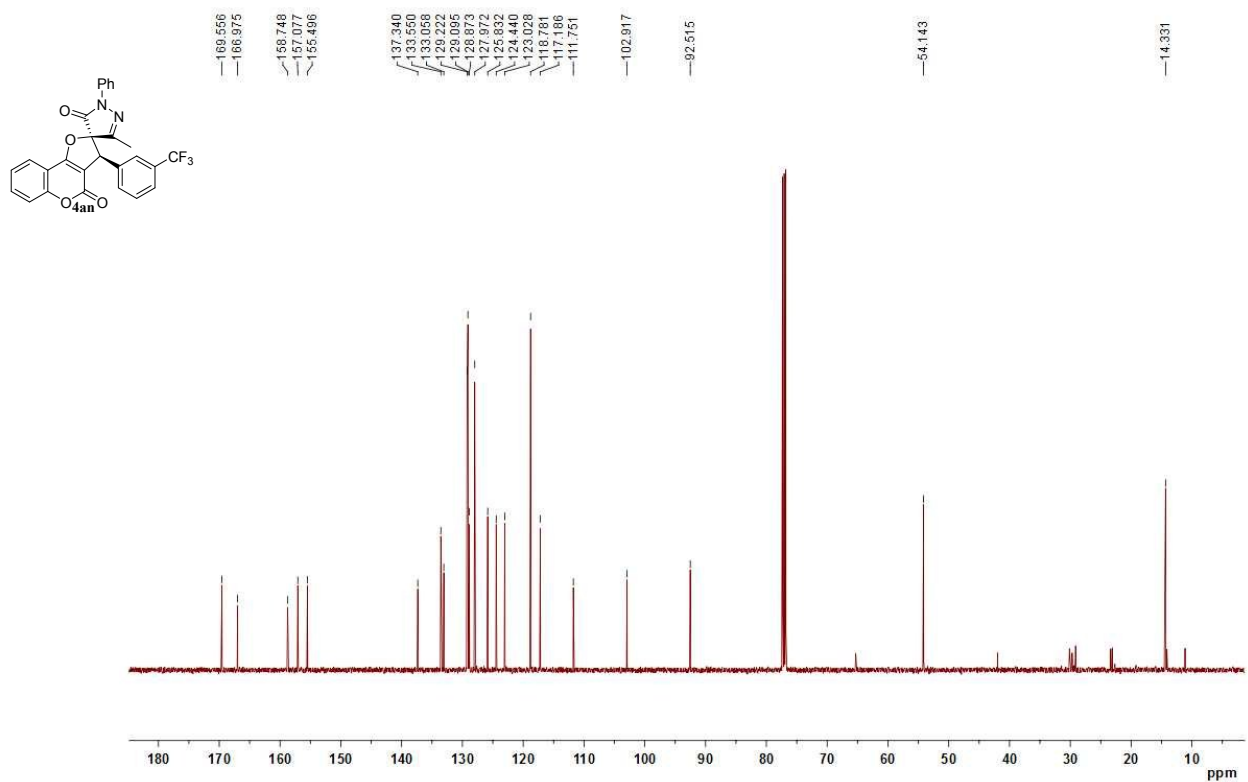

### HPLC chromatogram of 4an (racemic)

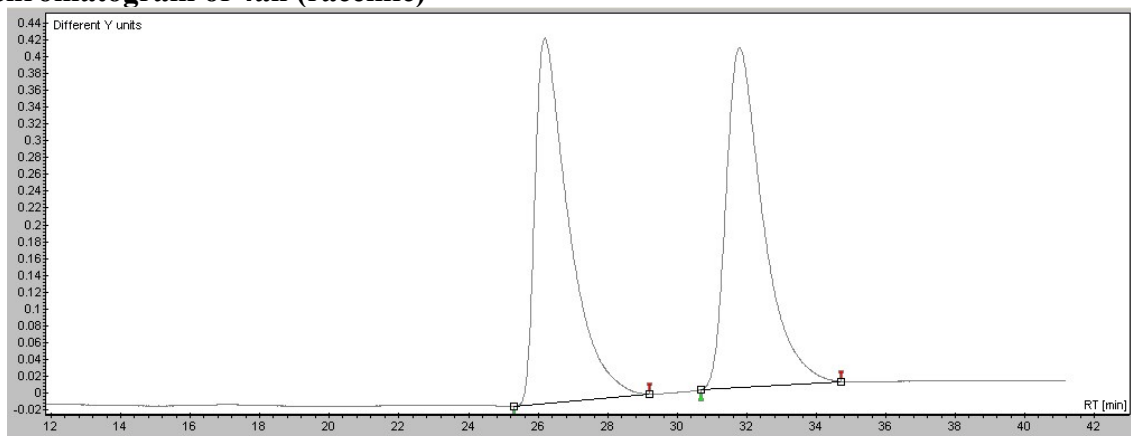

| # | Start [Min] | Time [Min] | End [Min] | Area % [%] |
|---|-------------|------------|-----------|------------|
| 1 | 25.316      | 26.185     | 29.188    | 49.62      |
| 2 | 30.677      | 31.784     | 34.719    | 50.38      |

### HPLC chromatogram of 4an (chiral)

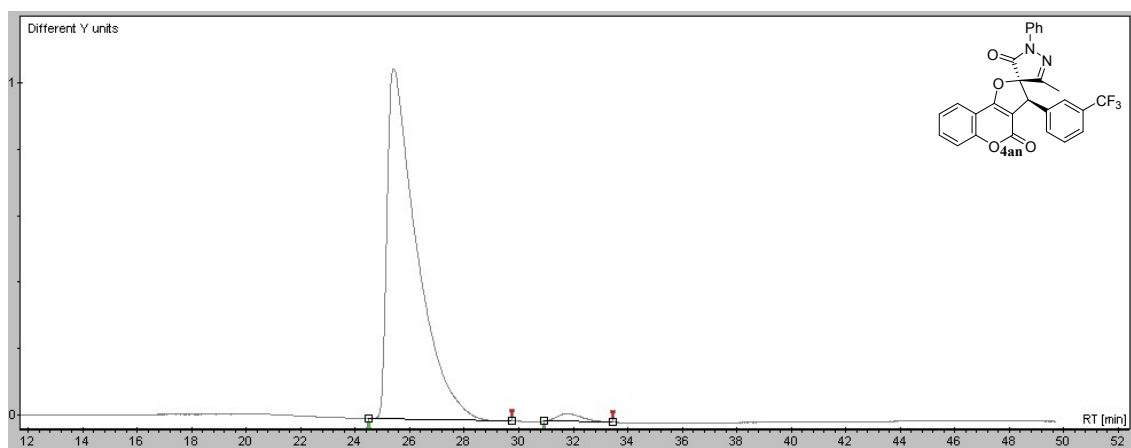

| # | Start [Min] | Time [Min] | End [Min] | Area % [%] |
|---|-------------|------------|-----------|------------|
| 1 | 24.5        | 25.398     | 29.74     | 98.13      |
| 2 | 30.921      | 31.798     | 33.438    | 1.87       |

# <sup>1</sup>H NMR, <sup>13</sup>C NMR spectra of 4ao

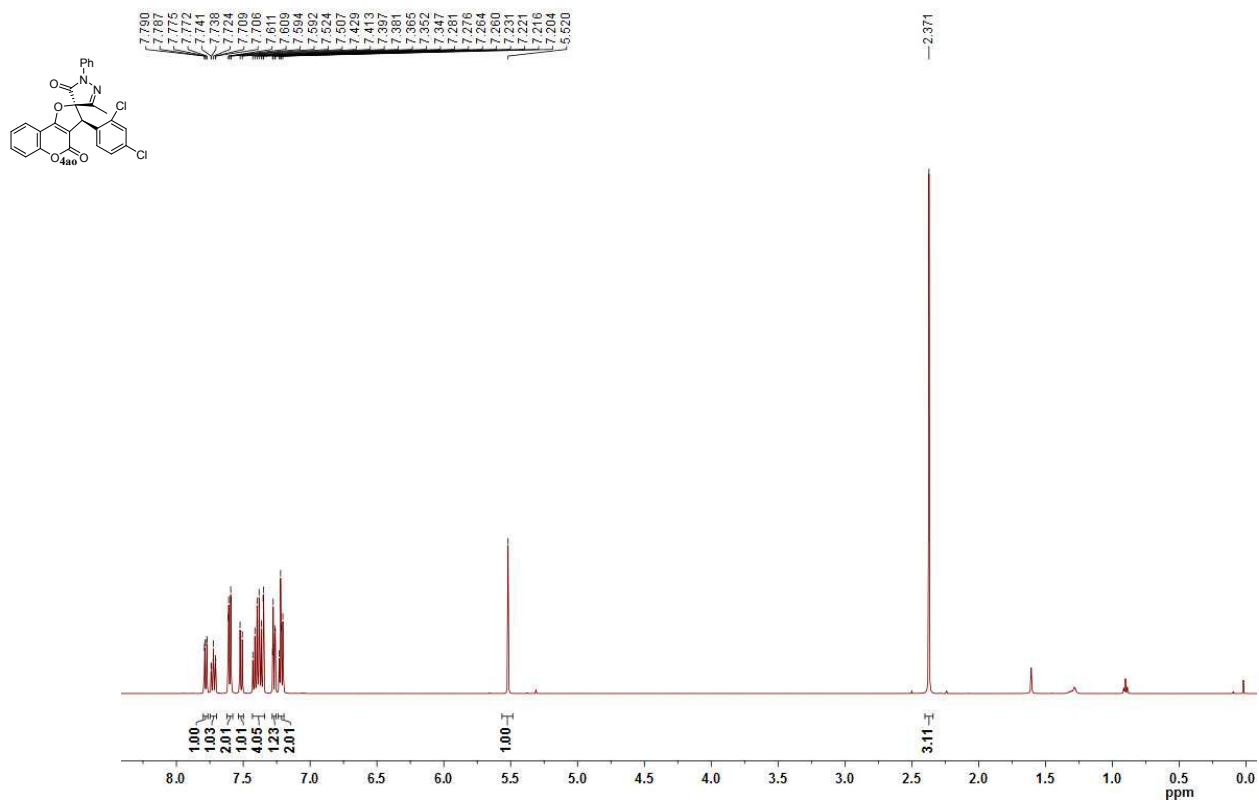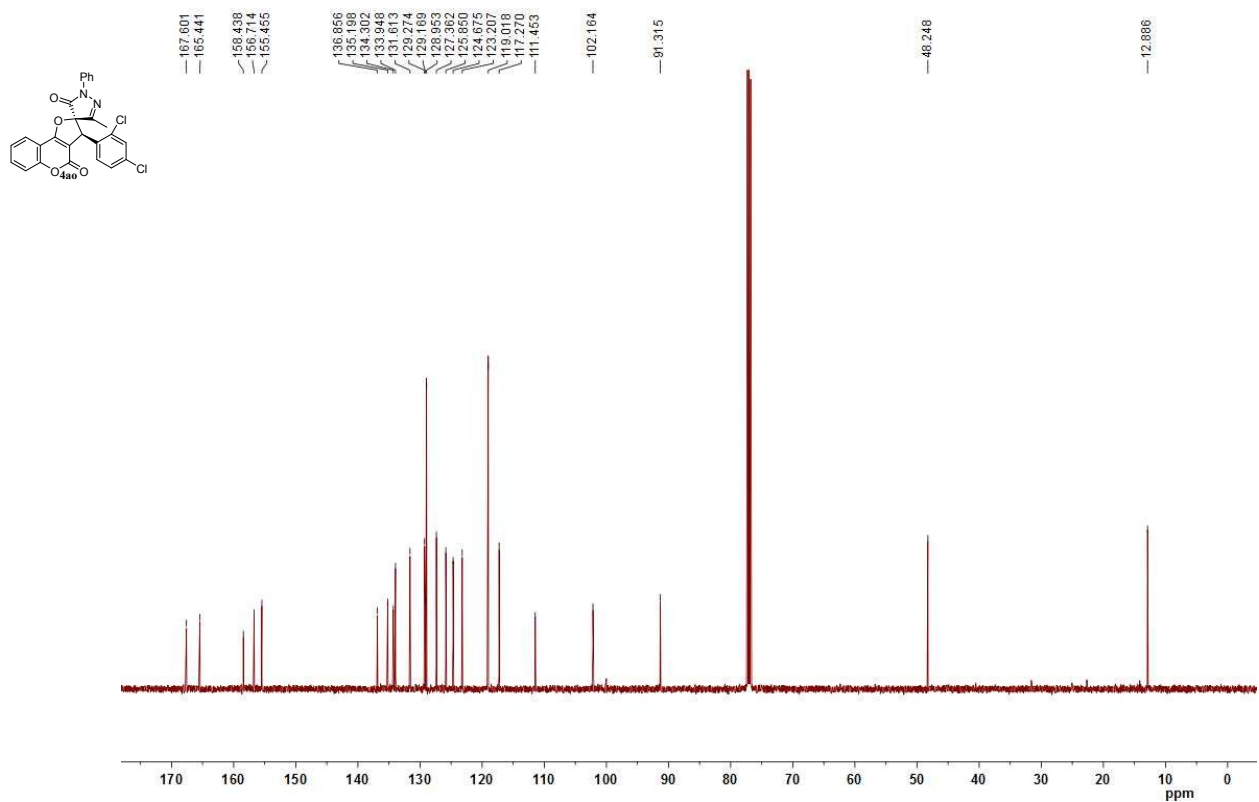

### HPLC chromatogram of 4ao (racemic)

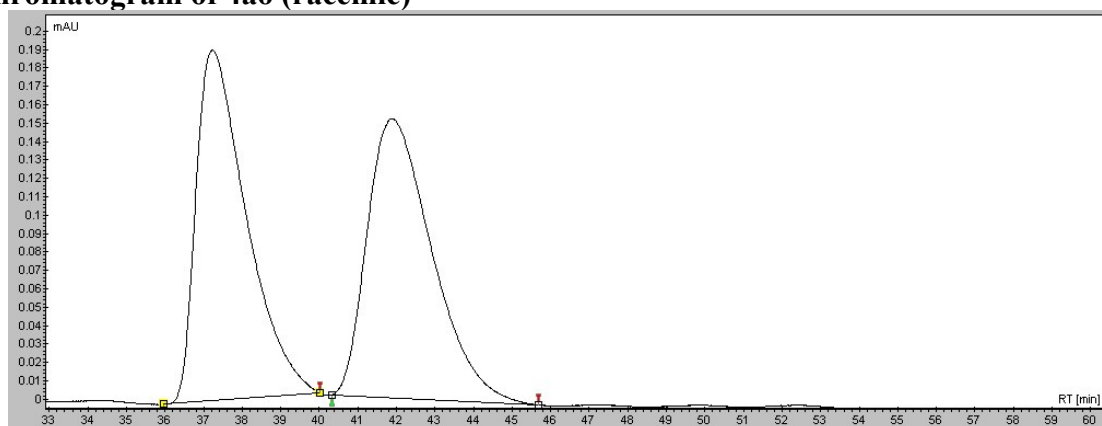

| # | Start [Min] | Time [Min] | End [Min] | Area % [%] |
|---|-------------|------------|-----------|------------|
| 1 | 35.97       | 37.224     | 40.028    | 49.444     |
| 2 | 40.336      | 41.89      | 45.685    | 50.556     |

### HPLC chromatogram of 4ao (chiral)

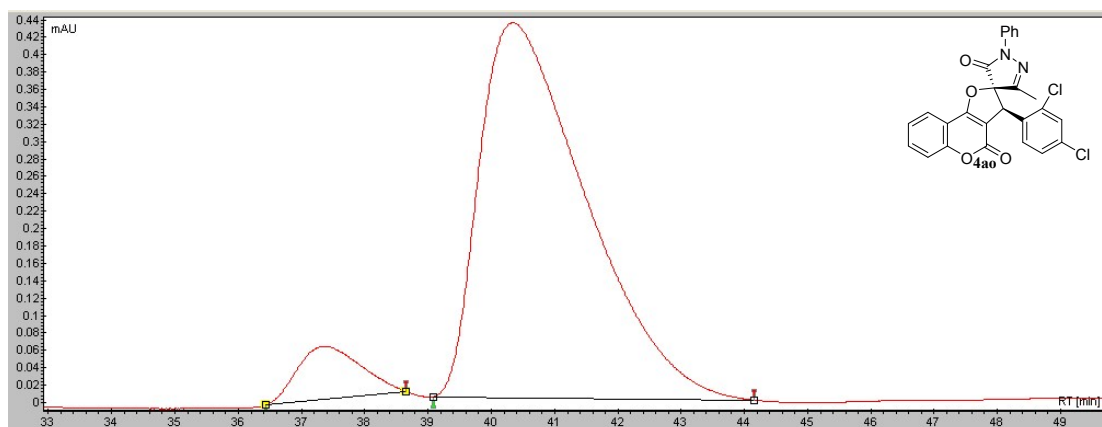

| # | Start [Min] | Time [Min] | End [Min] | Area % [%] |
|---|-------------|------------|-----------|------------|
| 1 | 36.443      | 37.331     | 38.66     | 7.73       |
| 2 | 39.085      | 40.344     | 44.146    | 92.27      |

# <sup>1</sup>H NMR, <sup>13</sup>C NMR spectra of 4ap

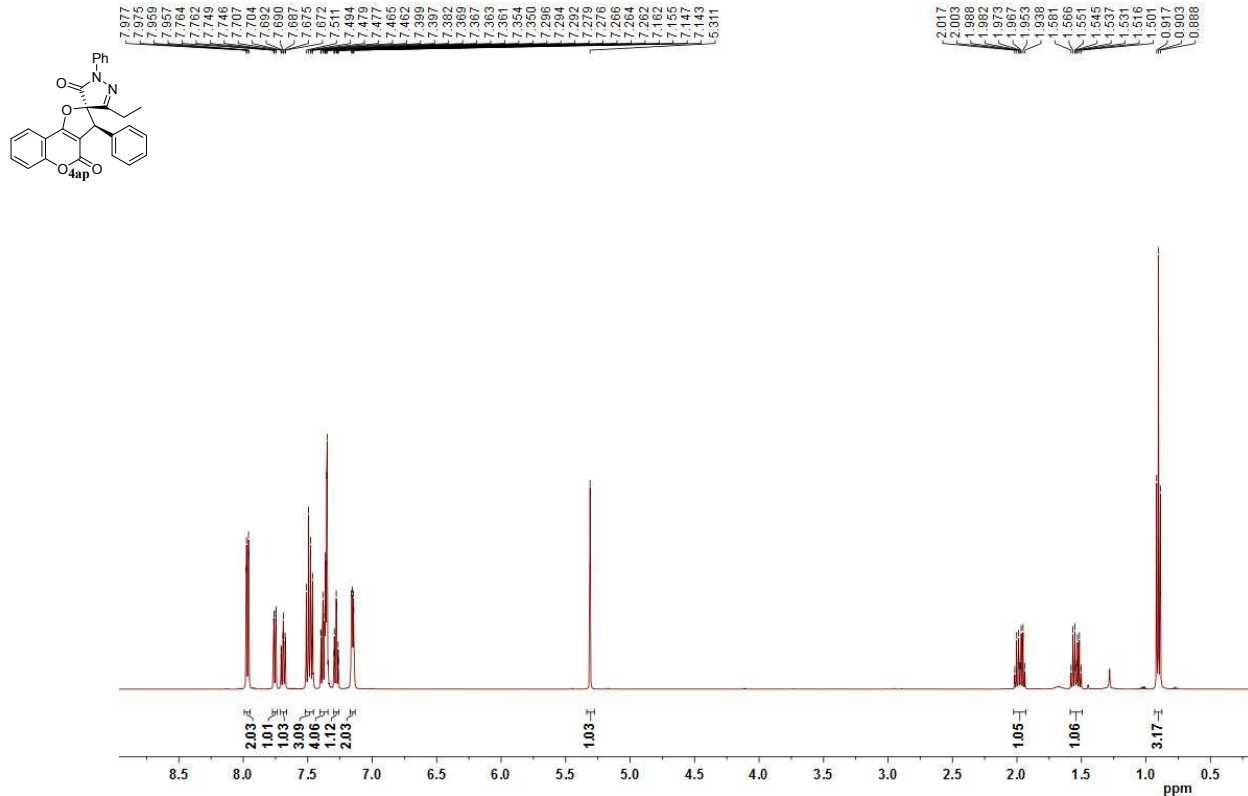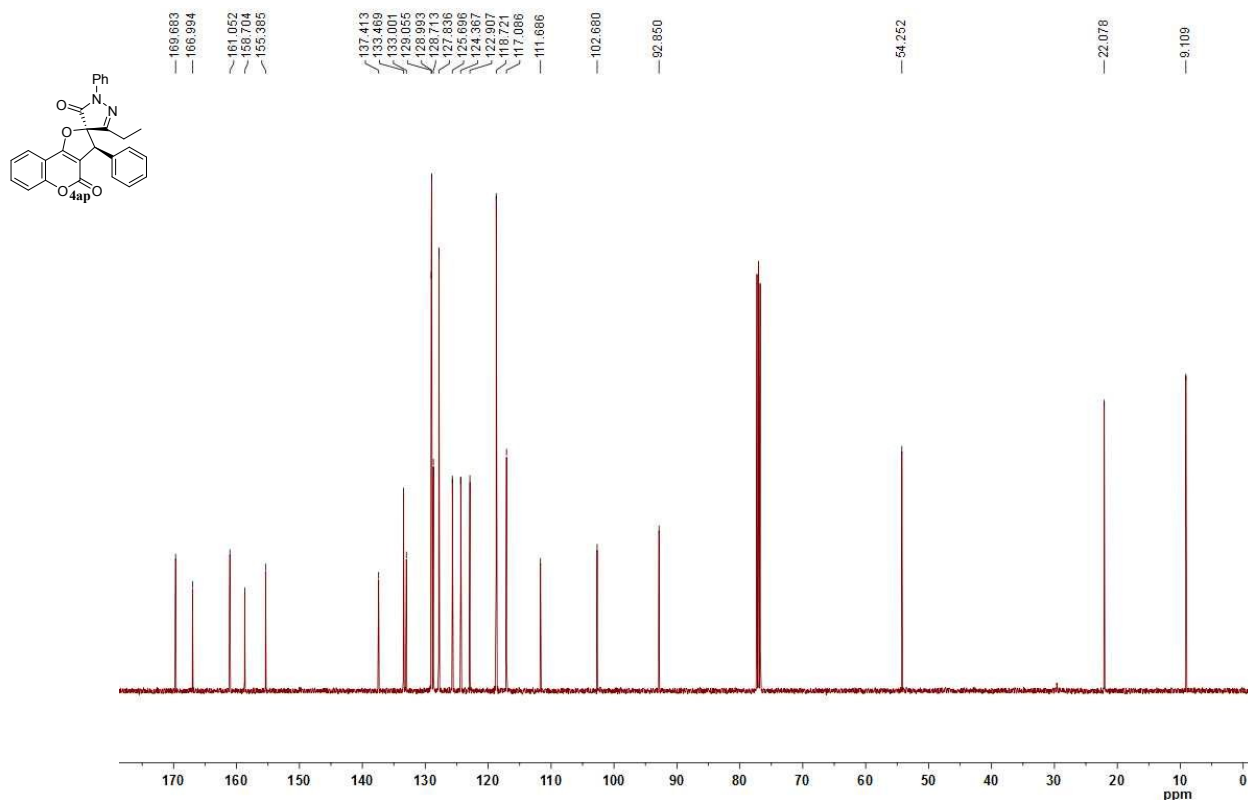

## HPLC chromatogram of 4ap (racemic)

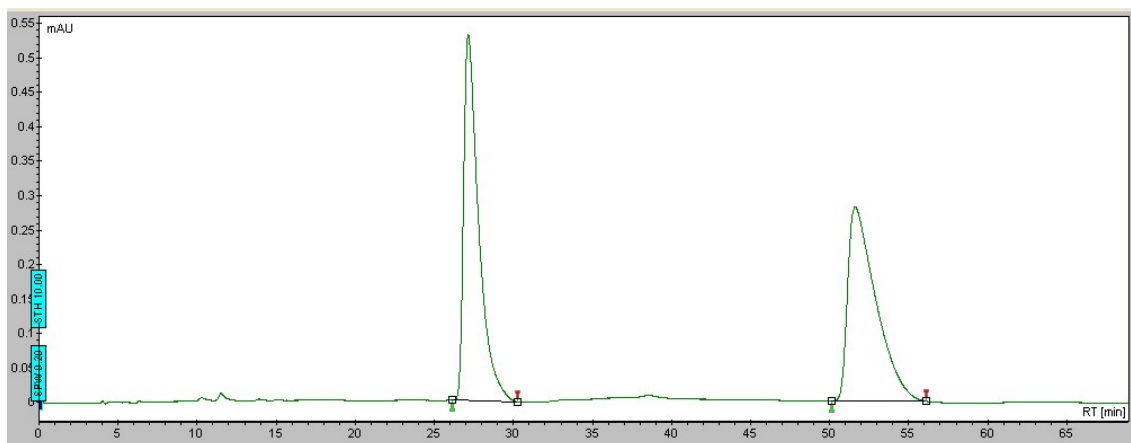

| # | Start [Min] | Time [Min] | End [Min] | Area % [%] |
|---|-------------|------------|-----------|------------|
| 1 | 26.13       | 27.137     | 30.259    | 50.173     |
| 2 | 50.124      | 51.608     | 56.104    | 49.827     |

## HPLC chromatogram of 4ap (chiral)

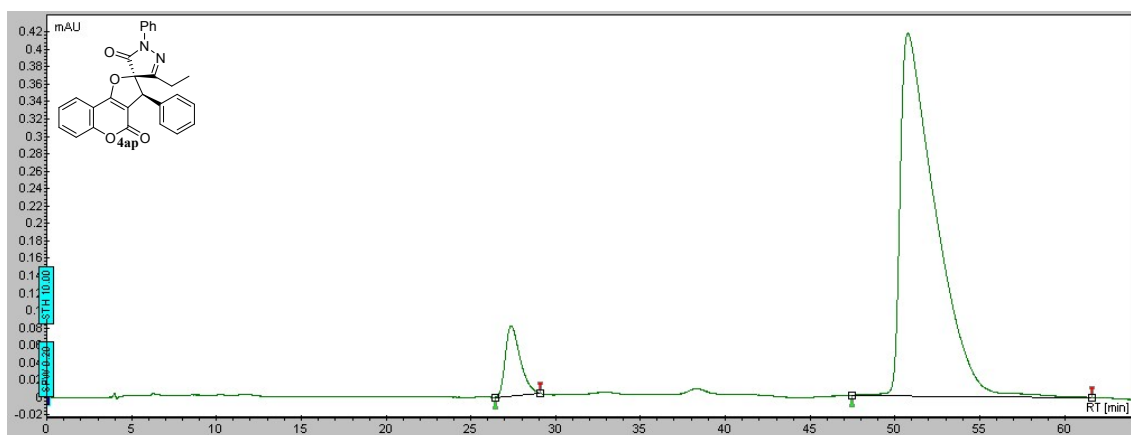

| # | Start [Min] | Time [Min] | End [Min] | Area % [%] |
|---|-------------|------------|-----------|------------|
| 1 | 26.441      | 27.371     | 29.085    | 7.536      |
| 2 | 47.461      | 50.756     | 61.607    | 92.464     |

# <sup>1</sup>H NMR, <sup>13</sup>C NMR spectra of 4ba

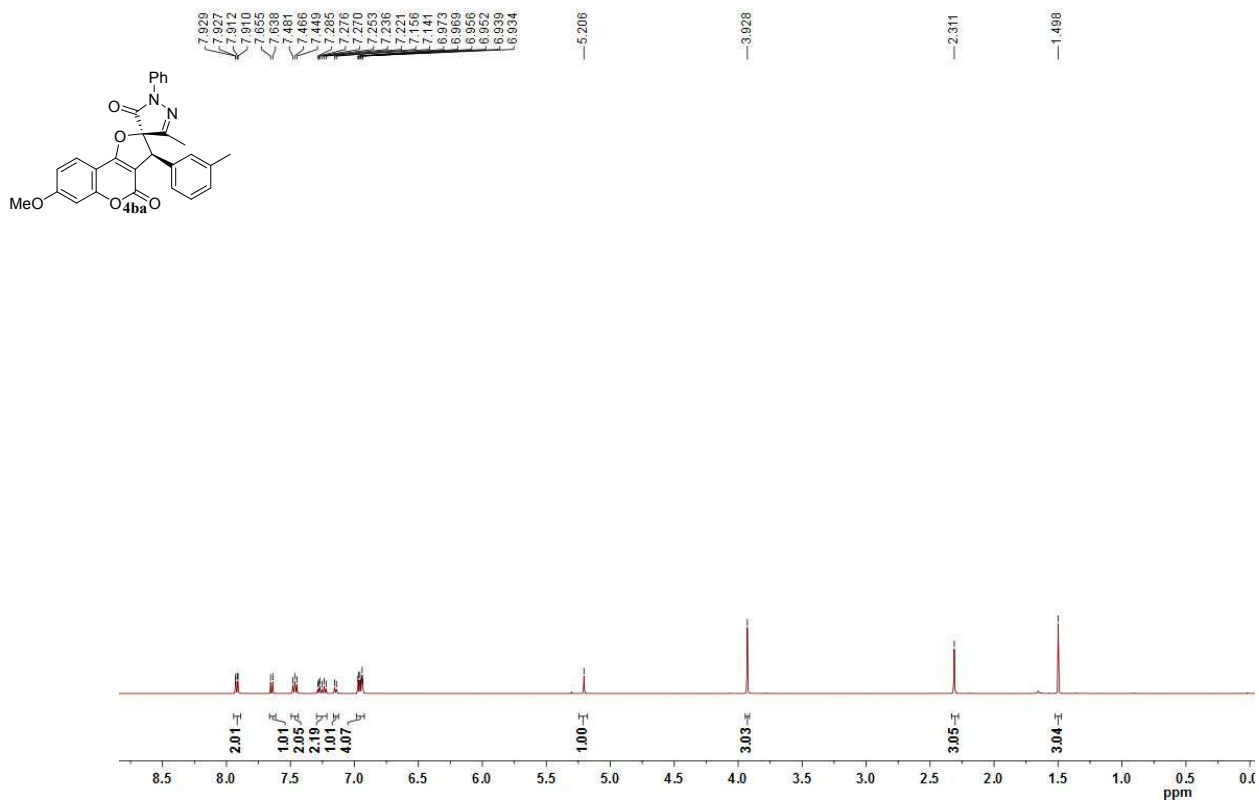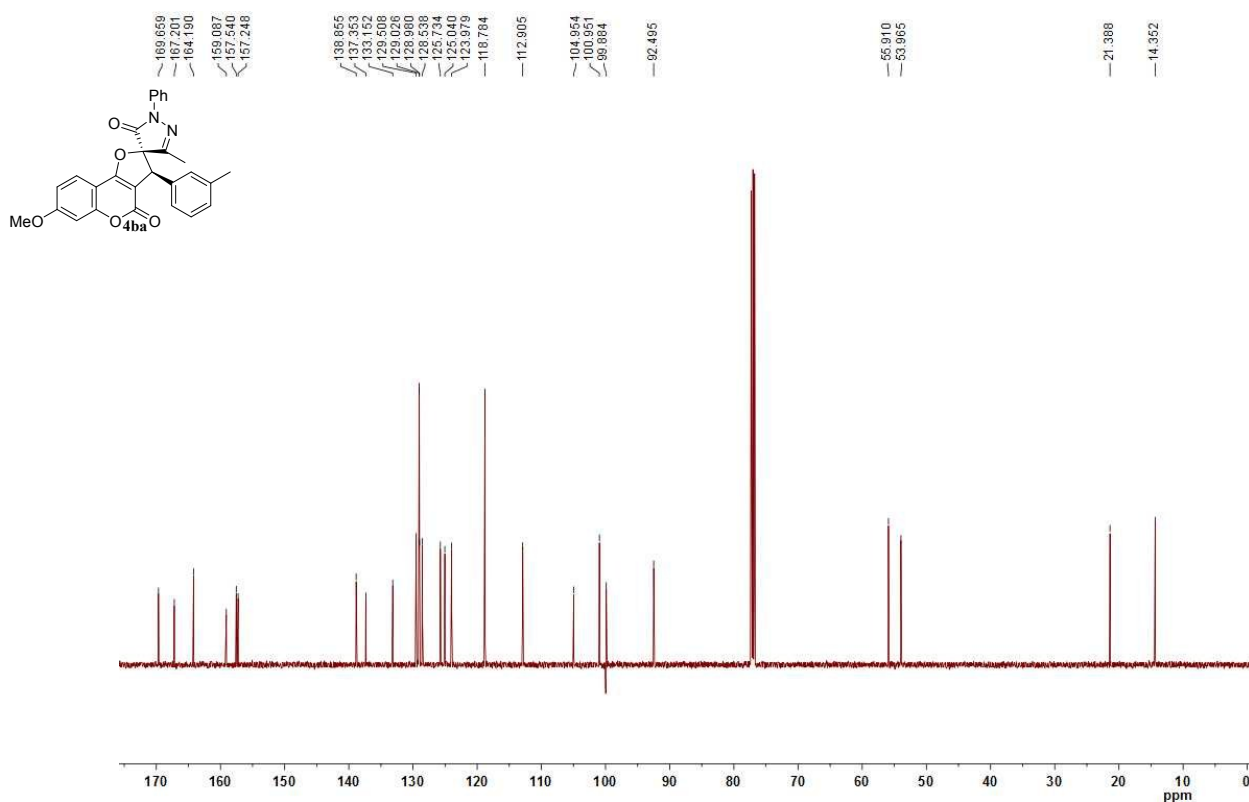

### HPLC chromatogram of 4ba (racemic)

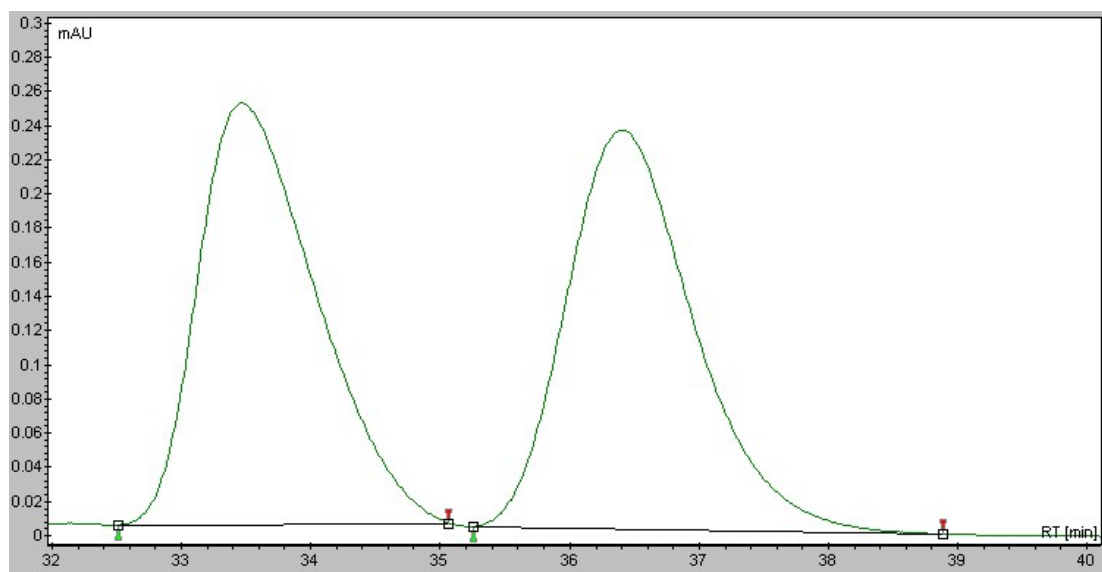

| # | Start time[min] | Time[min] | End time[min] | Area%  |
|---|-----------------|-----------|---------------|--------|
| 1 | 32.505          | 33.464    | 35.066        | 49.479 |
| 2 | 35.255          | 36.397    | 38.895        | 50.521 |

### HPLC chromatogram of 4ba (chiral)

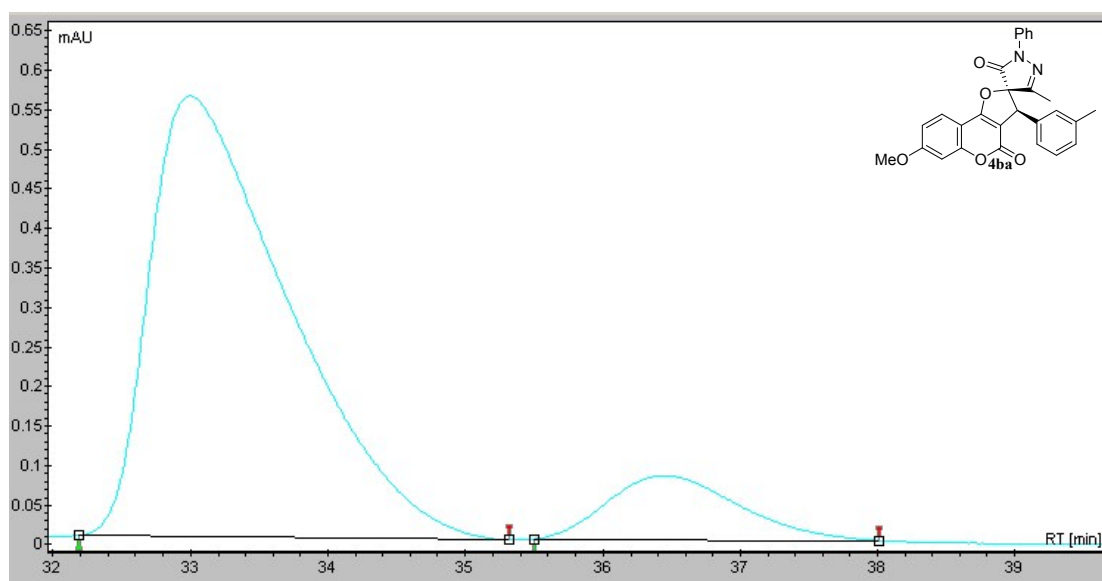

| # | Start time[min] | Time[min] | End time[min] | Area%  |
|---|-----------------|-----------|---------------|--------|
| 1 | 32.184          | 32.998    | 35.316        | 88.045 |
| 2 | 35.501          | 36.451    | 38.01         | 11.955 |



# $^1\text{H}$ NMR, $^{13}\text{C}$ NMR spectra of 4bb

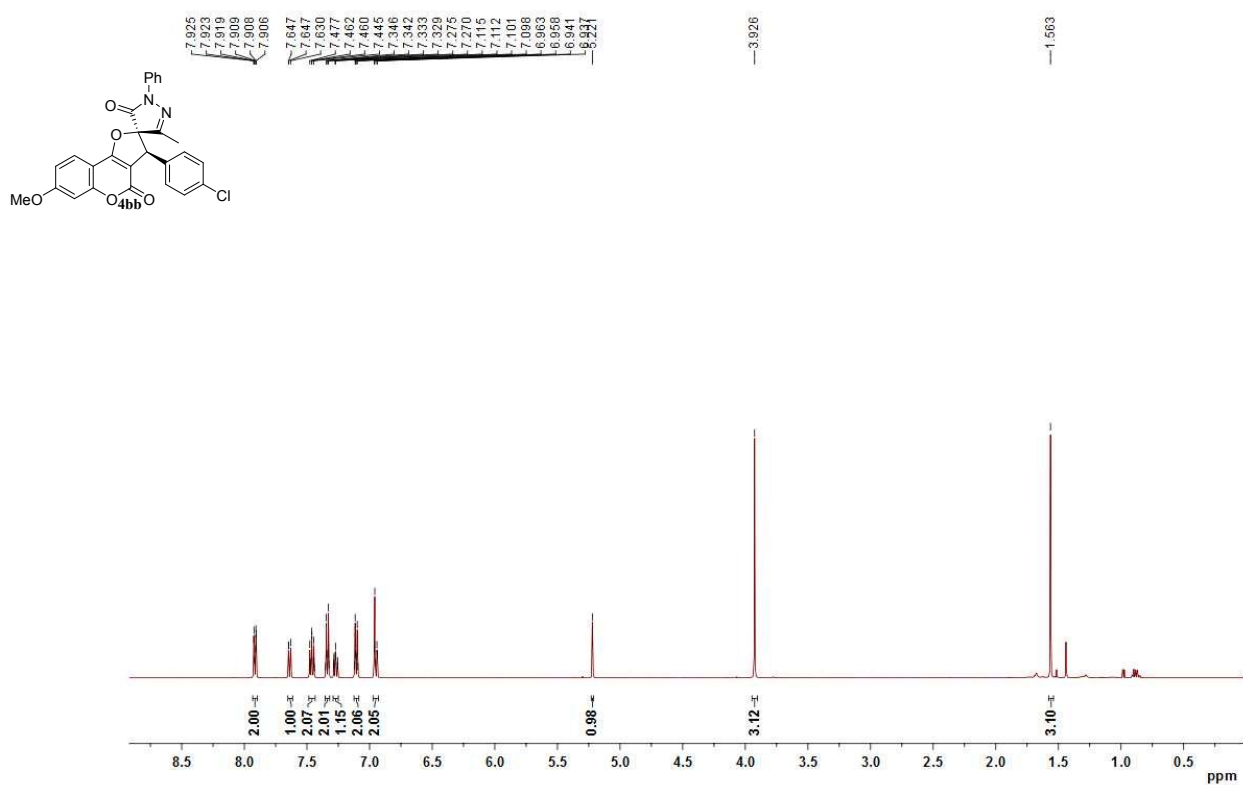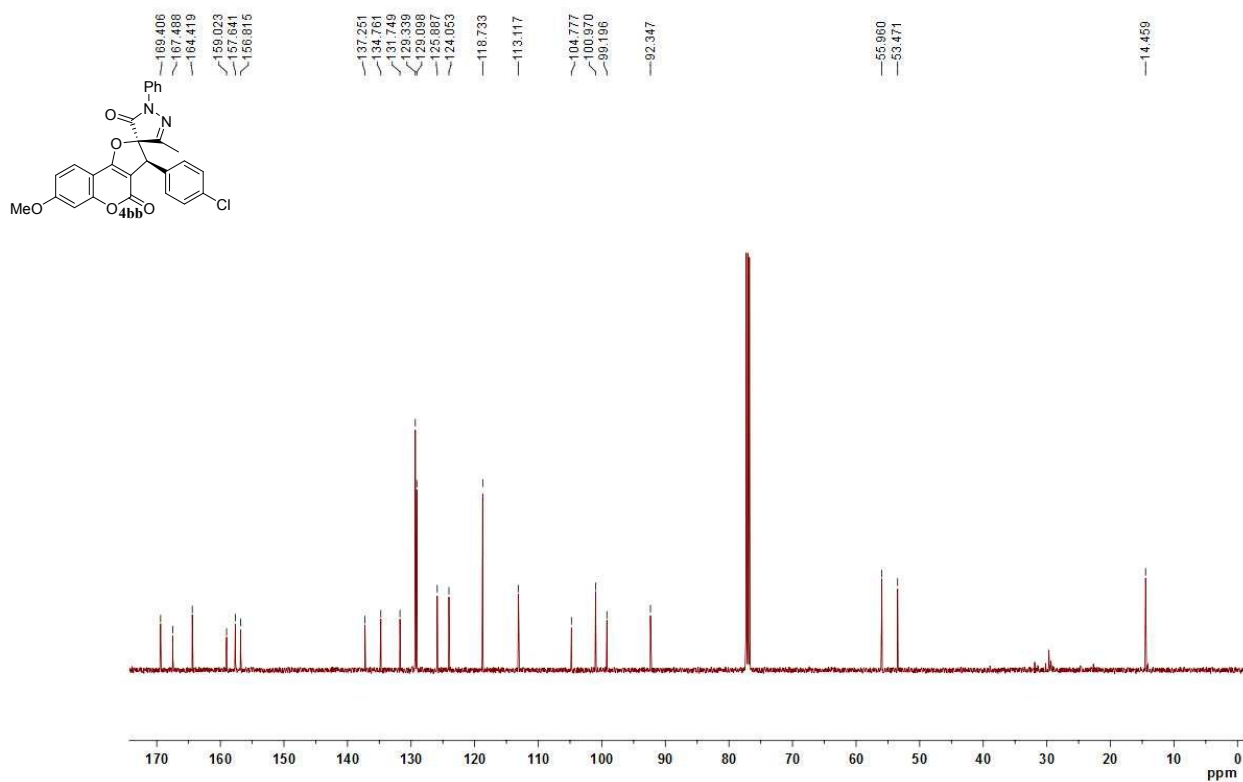

## HPLC chromatogram of 4bb (racemic)

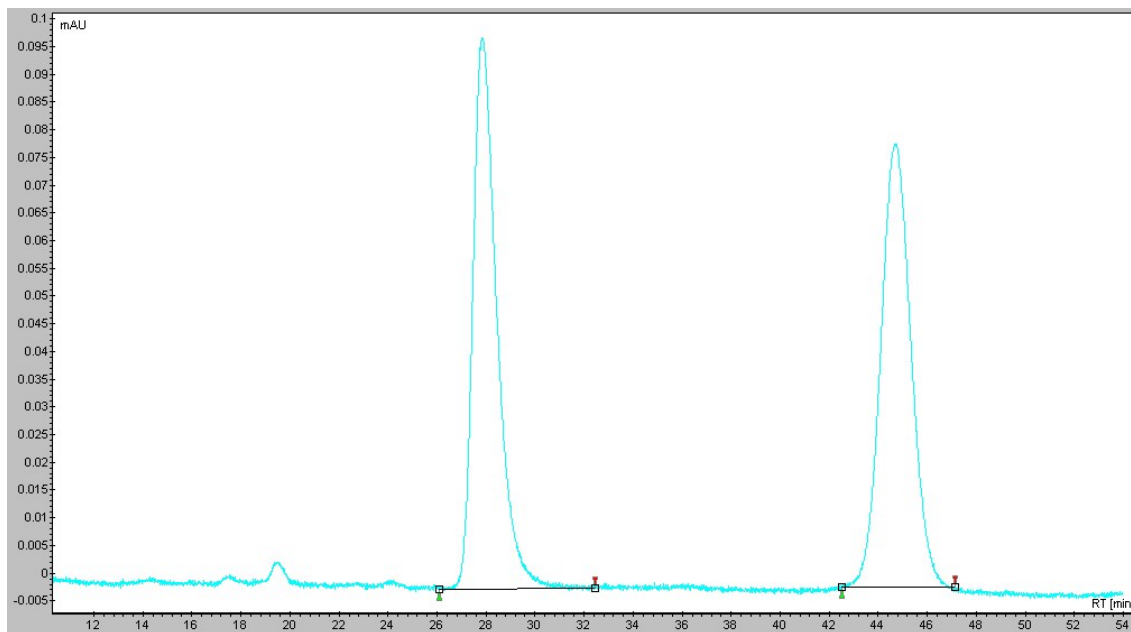

| # | Start time[min] | Time[min] | End time[min] | Area%  |
|---|-----------------|-----------|---------------|--------|
| 1 | 26.101          | 27.851    | 32.459        | 49.775 |
| 2 | 42.498          | 44.703    | 47.127        | 50.225 |

## HPLC chromatogram of 4bb (chiral)

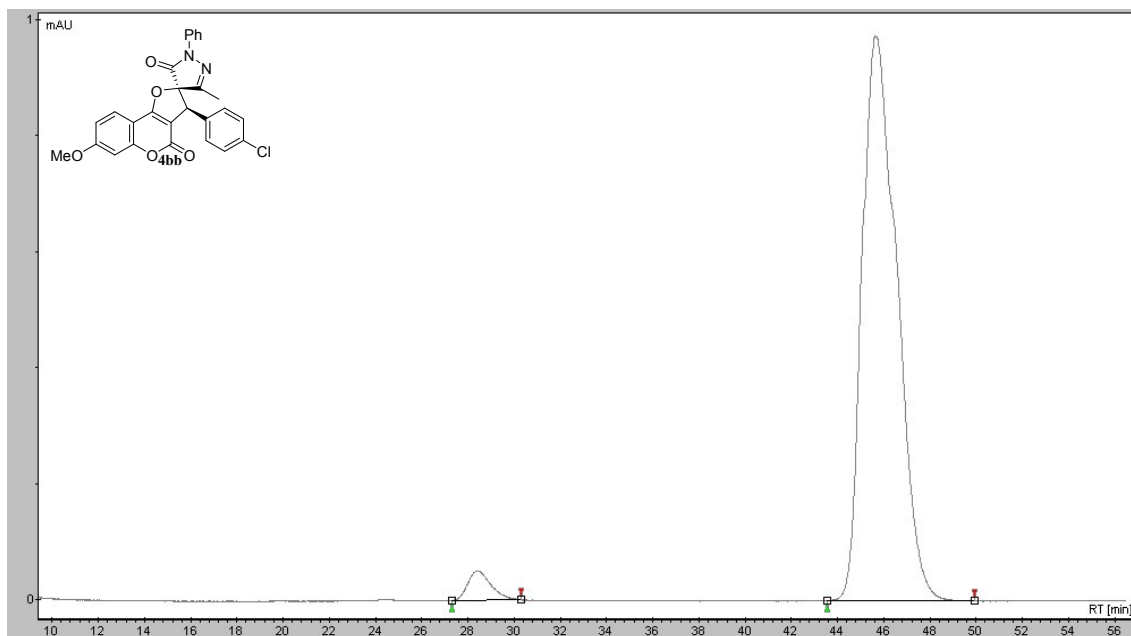

| # | Start time[min] | Time[min] | End time[min] | Area%  |
|---|-----------------|-----------|---------------|--------|
| 1 | 27.313          | 28.411    | 30.289        | 3.317  |
| 2 | 43.537          | 45.597    | 49.957        | 96.683 |

# <sup>1</sup>H NMR, <sup>13</sup>C NMR spectra of 4bc

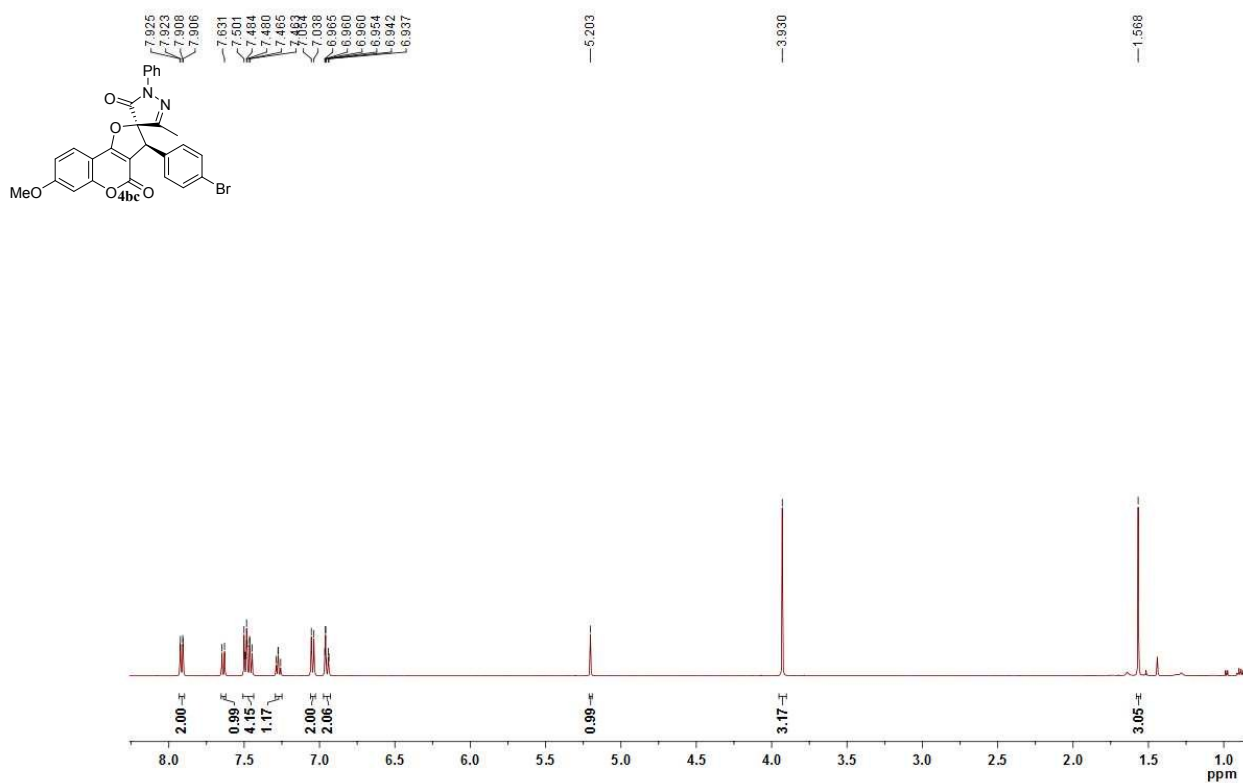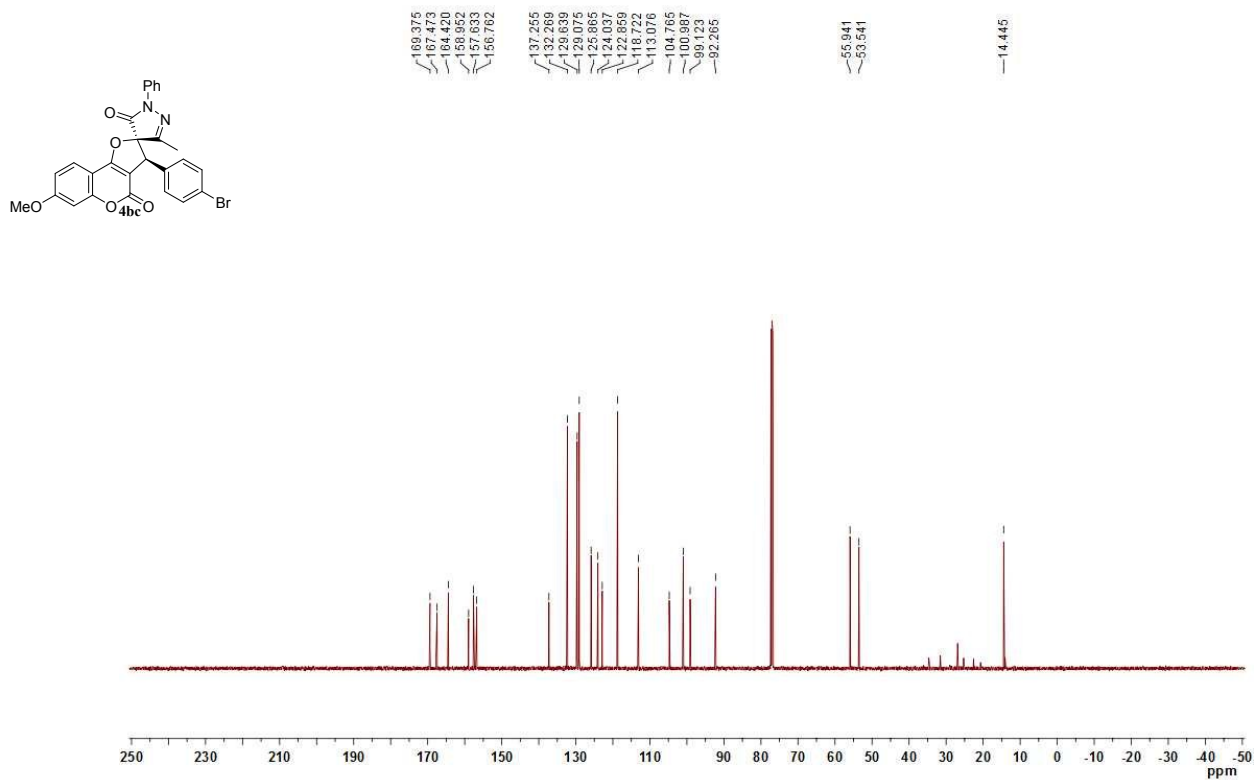

### HPLC chromatogram of 4bc (racemic)

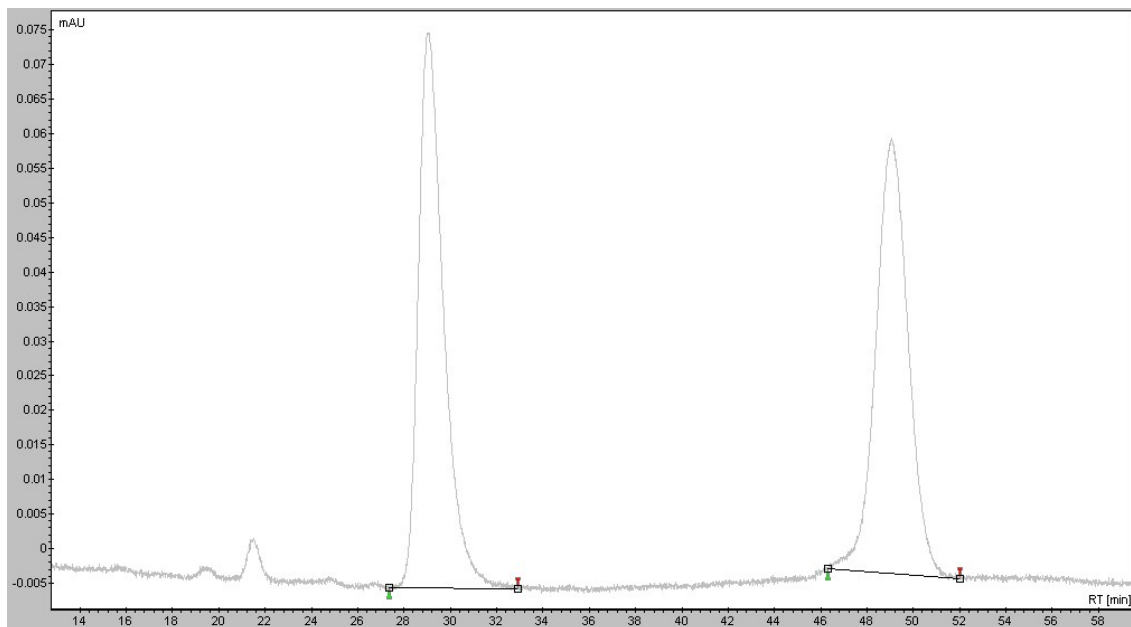

| # | Start time[min] | Time[min] | End time[min] | Area%  |
|---|-----------------|-----------|---------------|--------|
| 1 | 27.382          | 29.038    | 32.920        | 49.985 |
| 2 | 46.300          | 49.063    | 52.025        | 50.015 |

### HPLC chromatogram of 4bc (chiral)

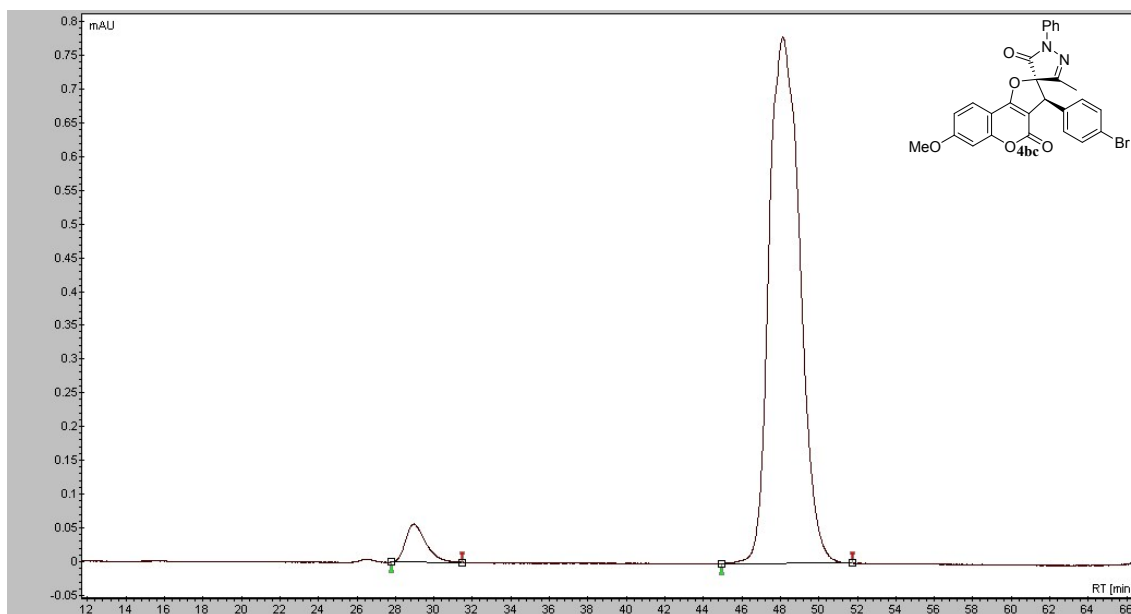

| # | Start time[min] | Time[min] | End time[min] | Area%  |
|---|-----------------|-----------|---------------|--------|
| 1 | 27.692          | 28.963    | 31.110        | 4.494  |
| 2 | 44.991          | 48.116    | 52.170        | 95.506 |

# <sup>1</sup>H NMR, <sup>13</sup>C NMR spectra of 4bd

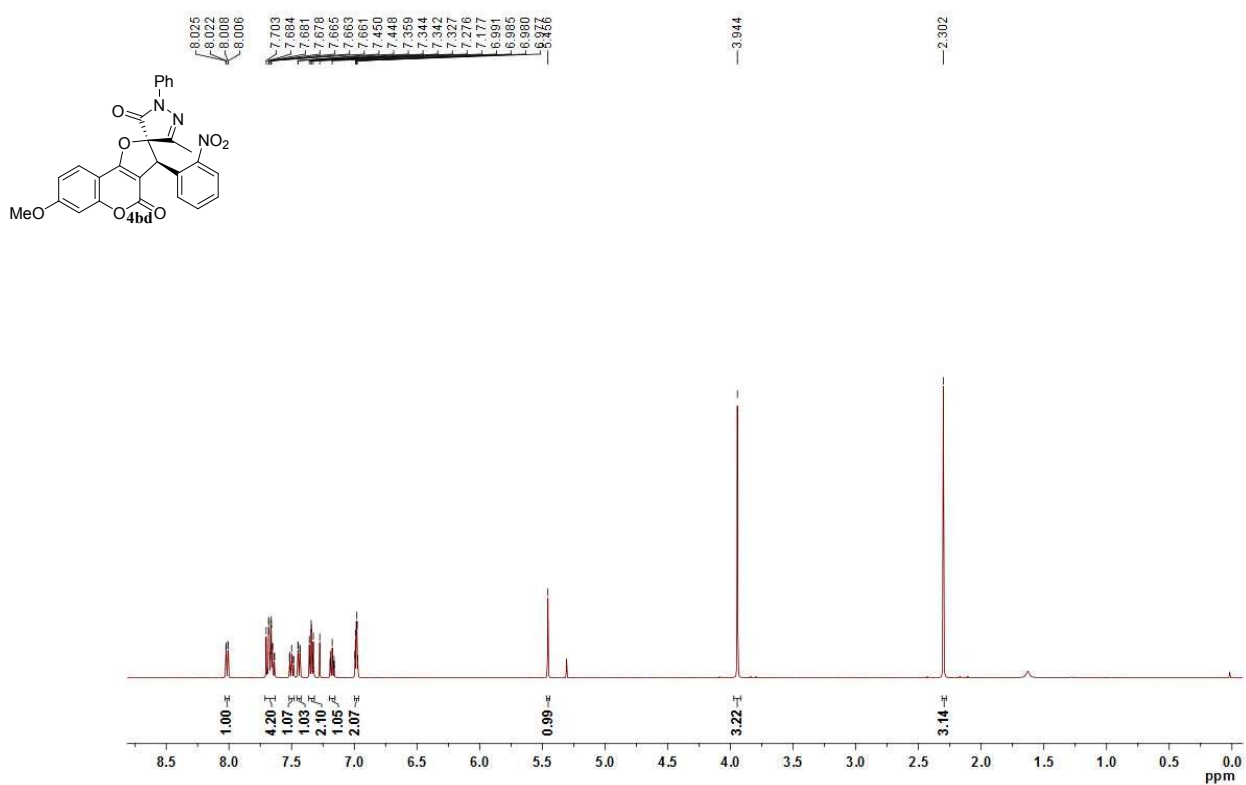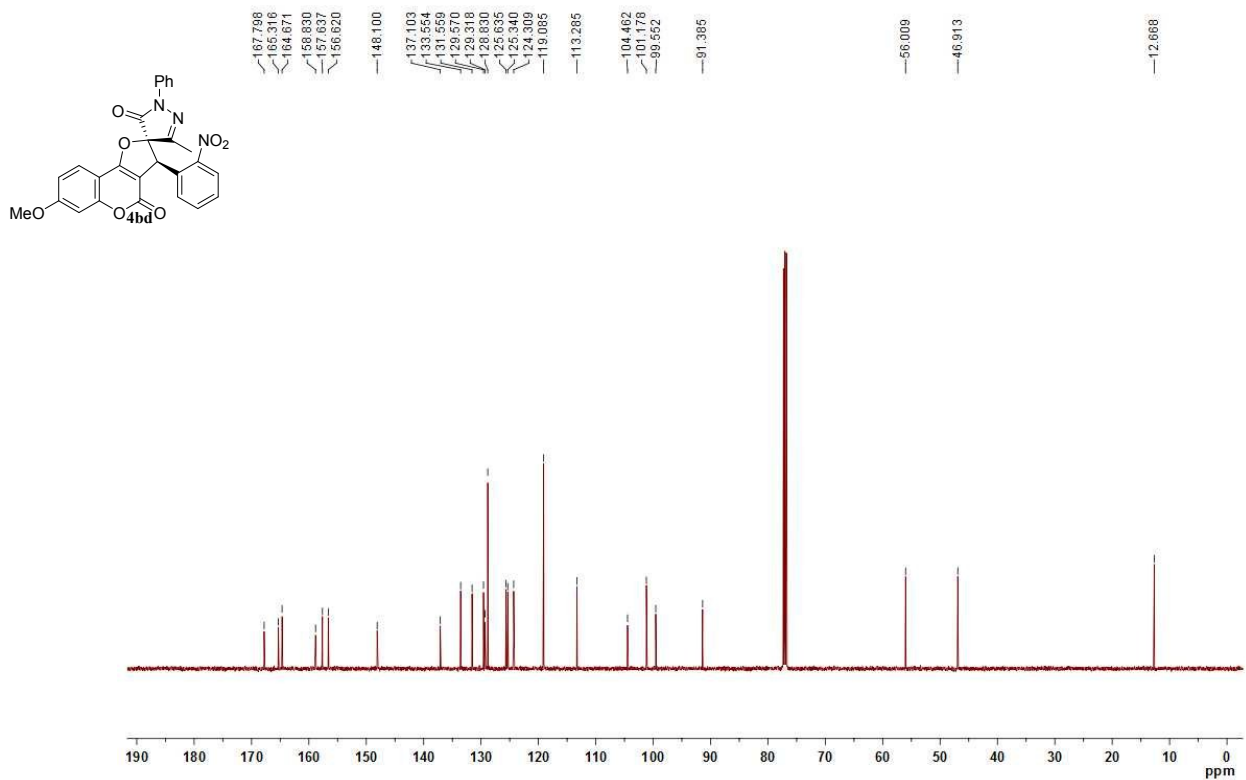

## HPLC chromatogram of 4bd (racemic)

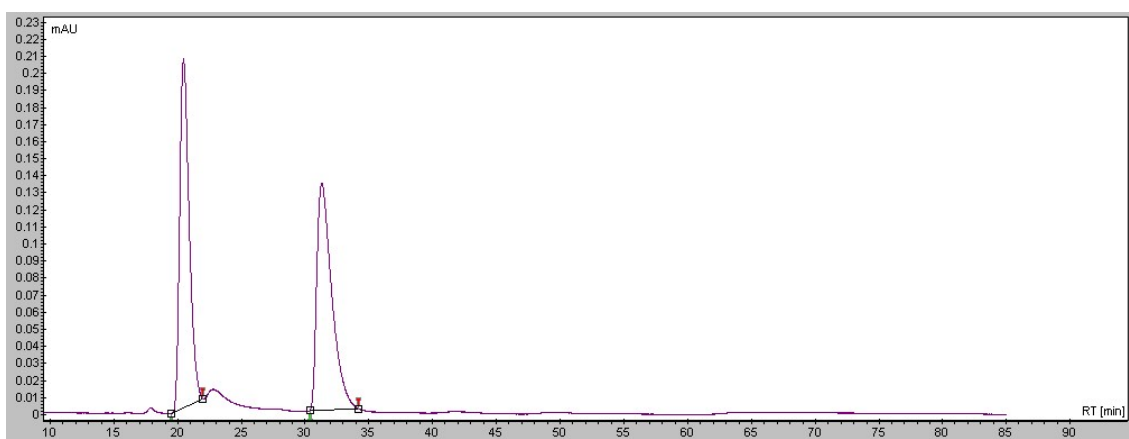

| # | Start [Min] | Time [Min] | End [Min] | Area % [%] |
|---|-------------|------------|-----------|------------|
| 1 | 19.538      | 20.473     | 21.99     | 49.393     |
| 2 | 30.401      | 31.309     | 34.179    | 50.607     |

## HPLC chromatogram of 4bd (chiral)

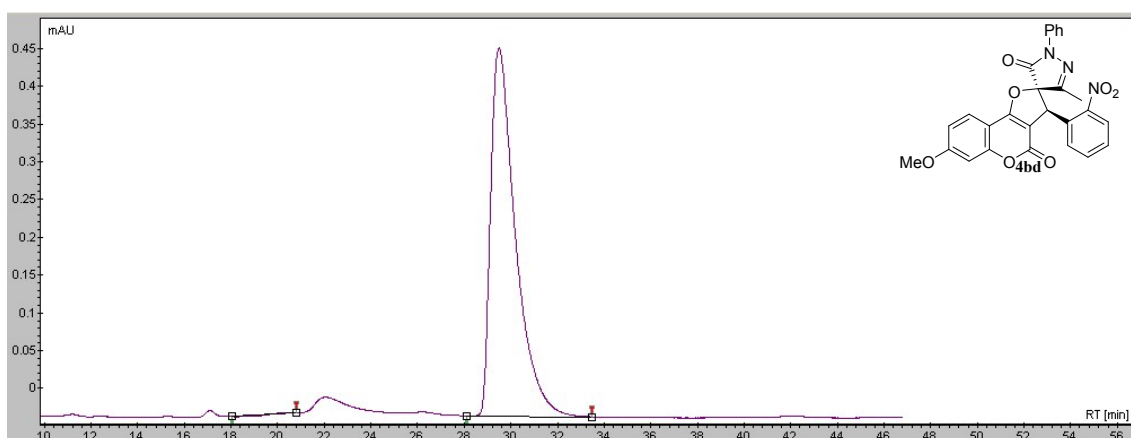

| # | Start [Min] | Time [Min] | End [Min] | Area % [%] |
|---|-------------|------------|-----------|------------|
| 1 | 18.044      | 19.132     | 20.801    | 0.09       |
| 2 | 28.106      | 29.491     | 33.475    | 99.91      |

# <sup>1</sup>H NMR, <sup>13</sup>C NMR spectra of 4be

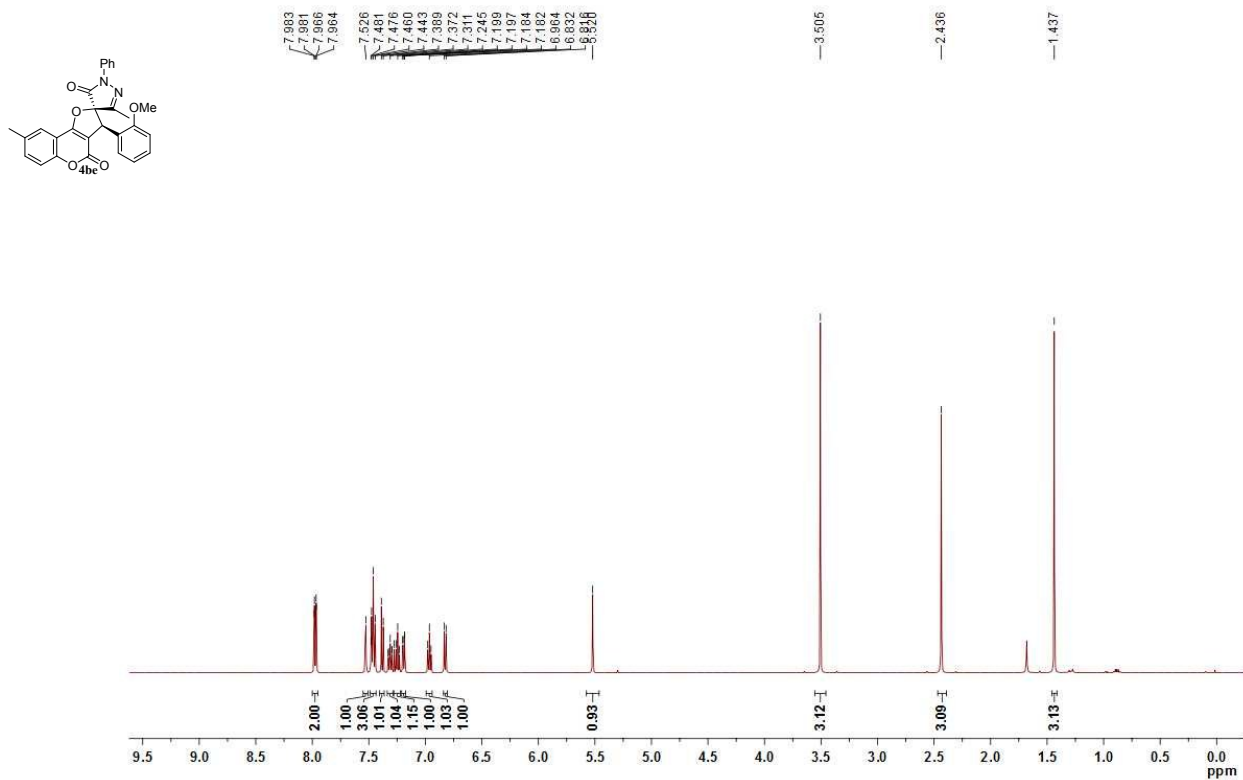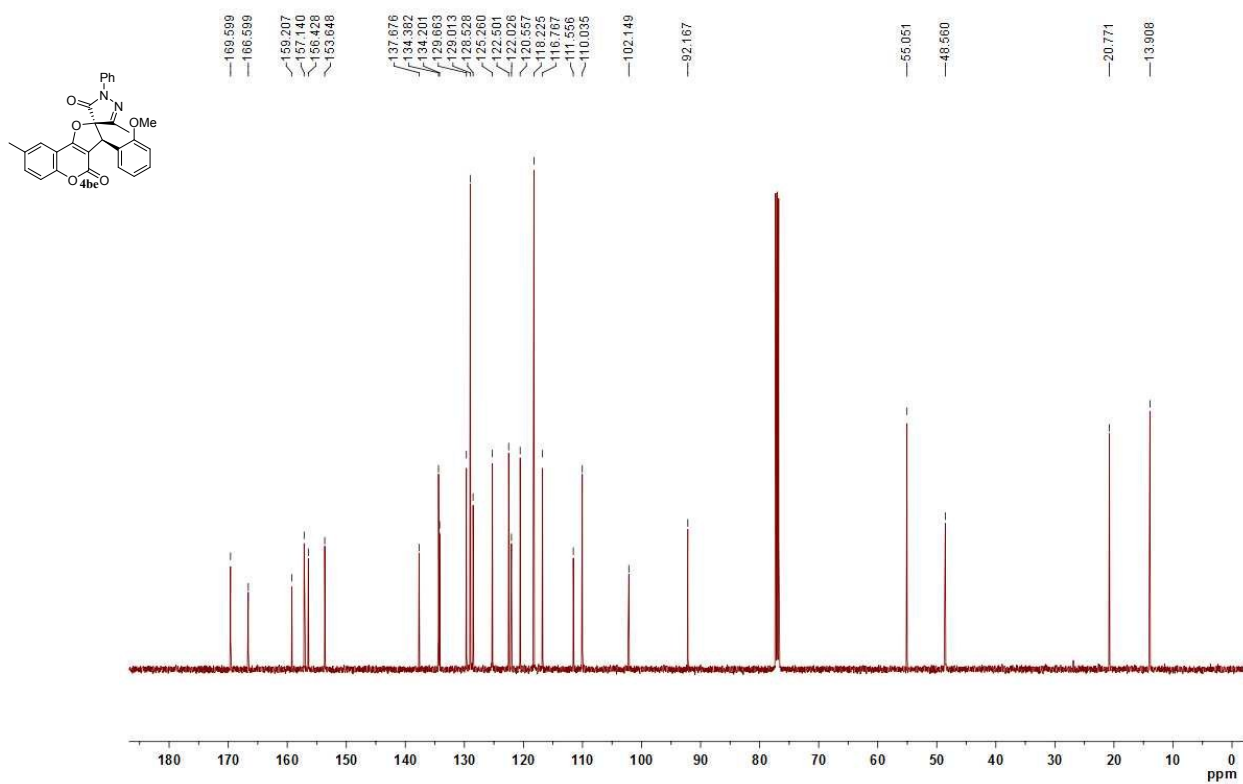

### HPLC chromatogram of 4be (racemic)

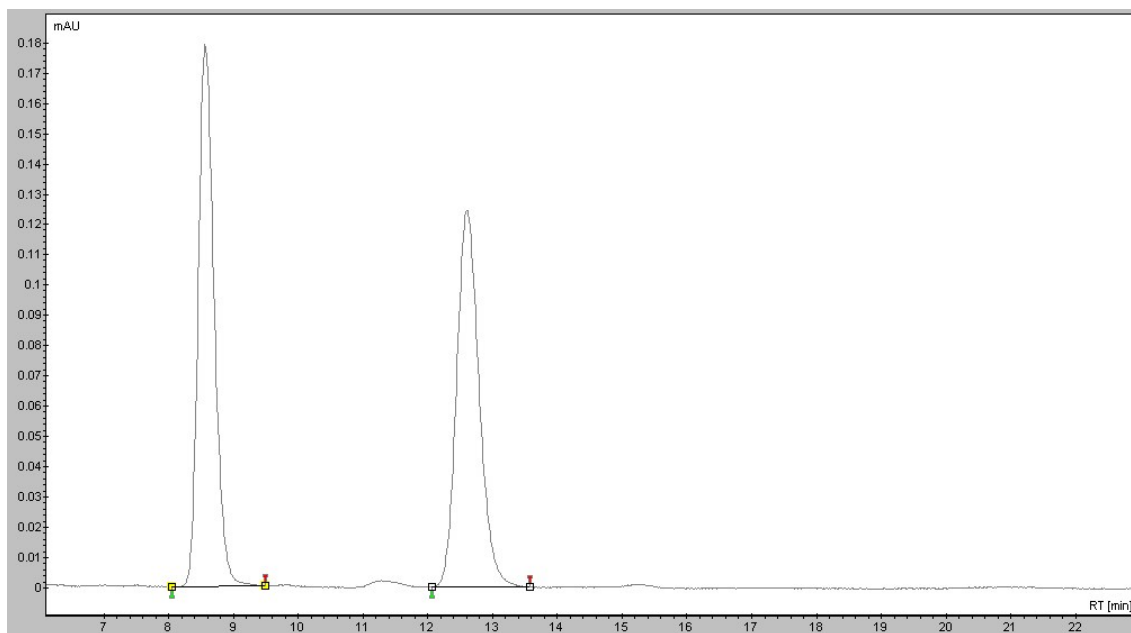

| # | Start time[min] | Time[min] | End time[min] | Area%  |
|---|-----------------|-----------|---------------|--------|
| 1 | 8.052           | 8.559     | 9.498         | 50.418 |
| 2 | 12.061          | 12.599    | 13.573        | 49.582 |

### HPLC chromatogram of 4be (chiral)

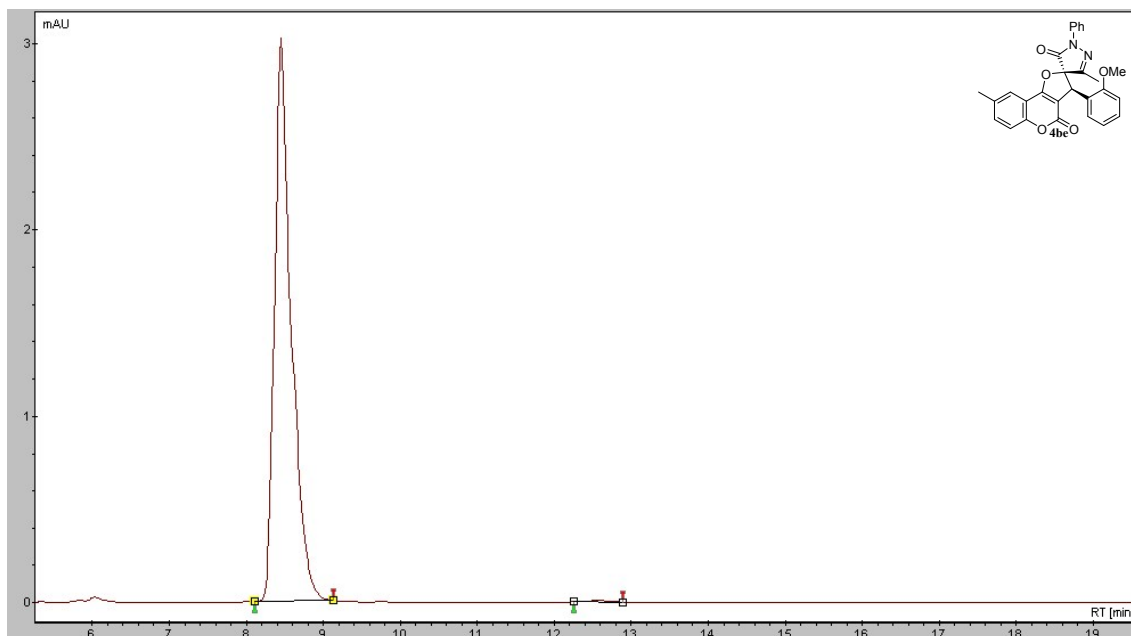

| # | Start time[min] | Time[min] | End time[min] | Area%  |
|---|-----------------|-----------|---------------|--------|
| 1 | 8.116           | 8.453     | 9.130         | 99.692 |
| 2 | 12.255          | 12.572    | 12.572        | 0.308  |



# <sup>1</sup>H NMR, <sup>13</sup>C NMR spectra of 4bf

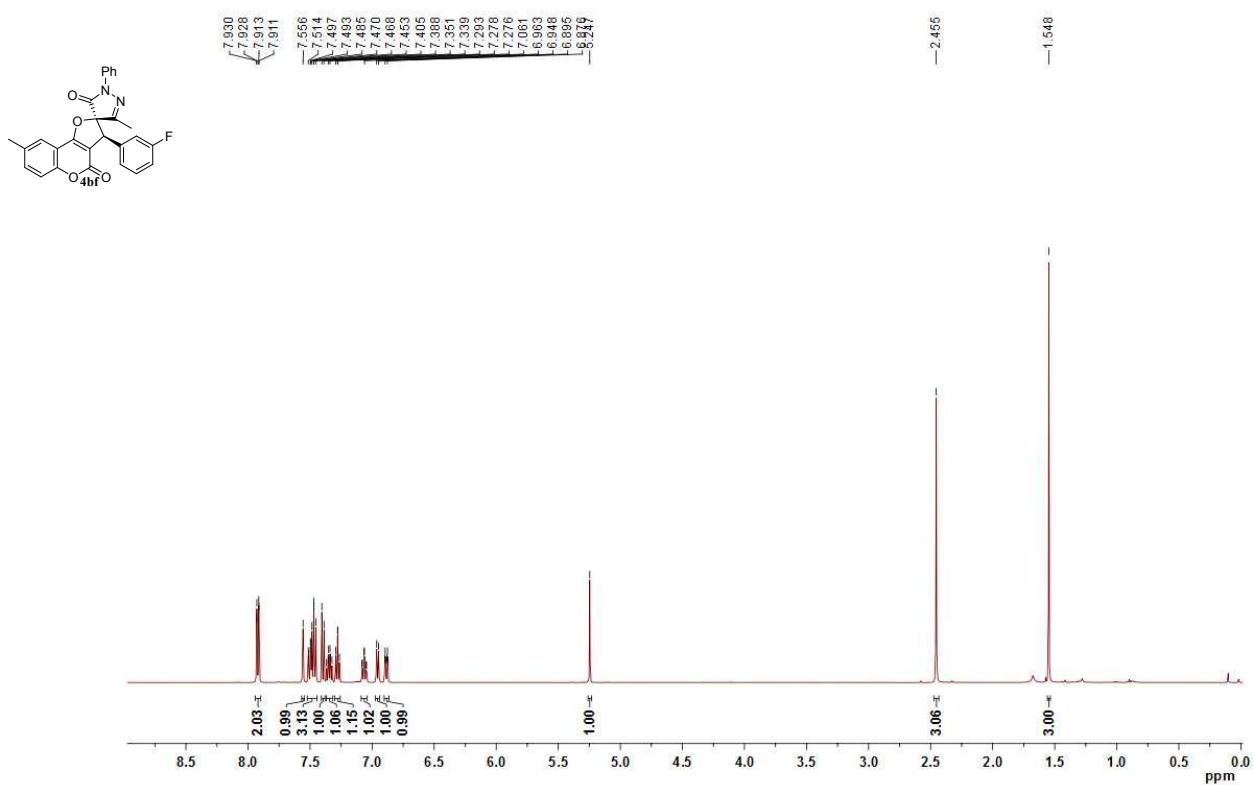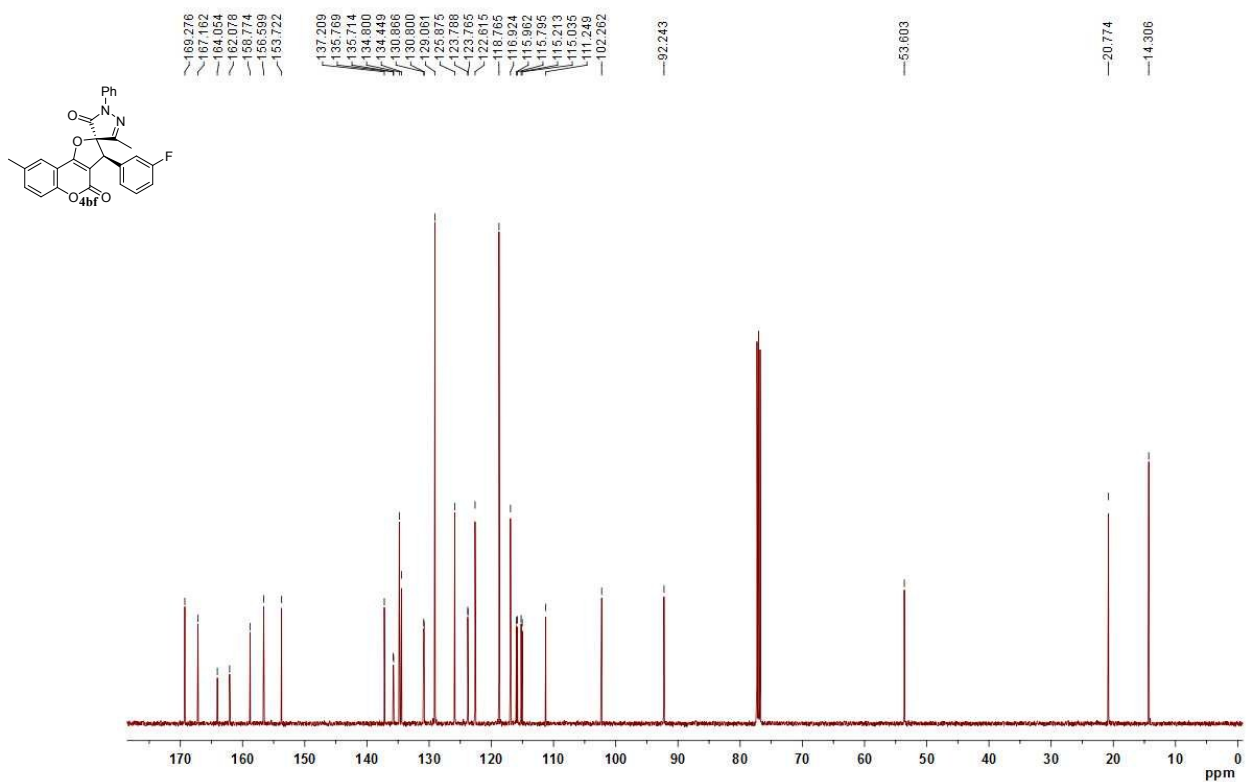

## HPLC chromatogram of 4bf (racemic)

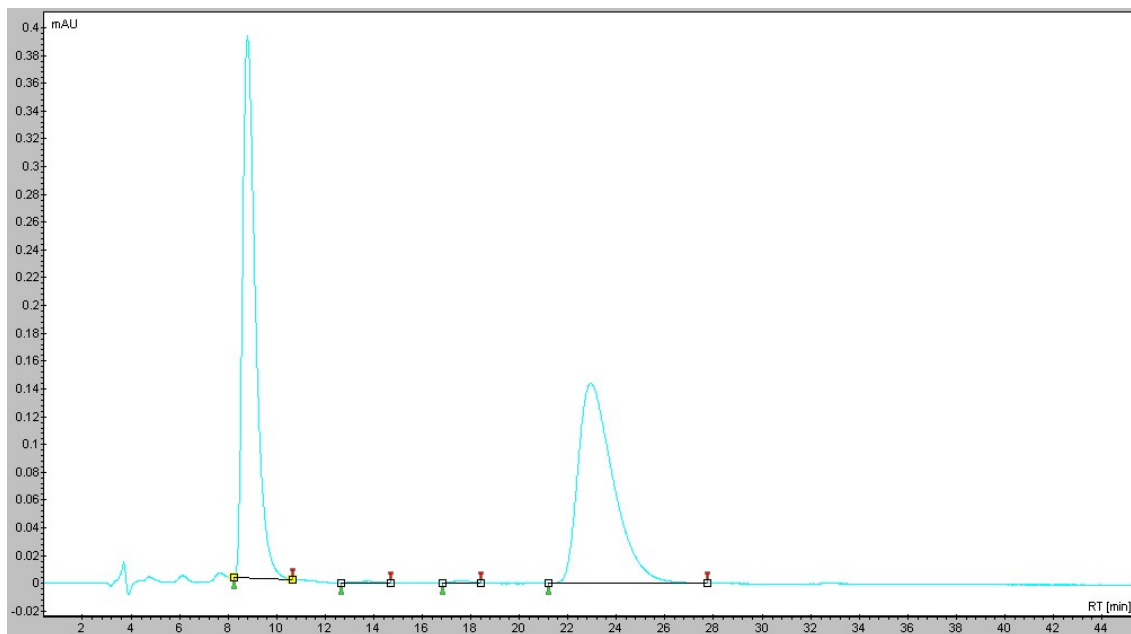

| # | Start time[min] | Time[min] | End time[min] | Area%  |
|---|-----------------|-----------|---------------|--------|
| 1 | 8.244           | 8.797     | 10.638        | 49.767 |
| 2 | 12.657          | 13.782    | 14.700        | 0.251  |
| 3 | 16.836          | 17.554    | 18.414        | 0.256  |
| 4 | 21.210          | 22.965    | 27.725        | 49.727 |

## HPLC chromatogram of 4bf (chiral)

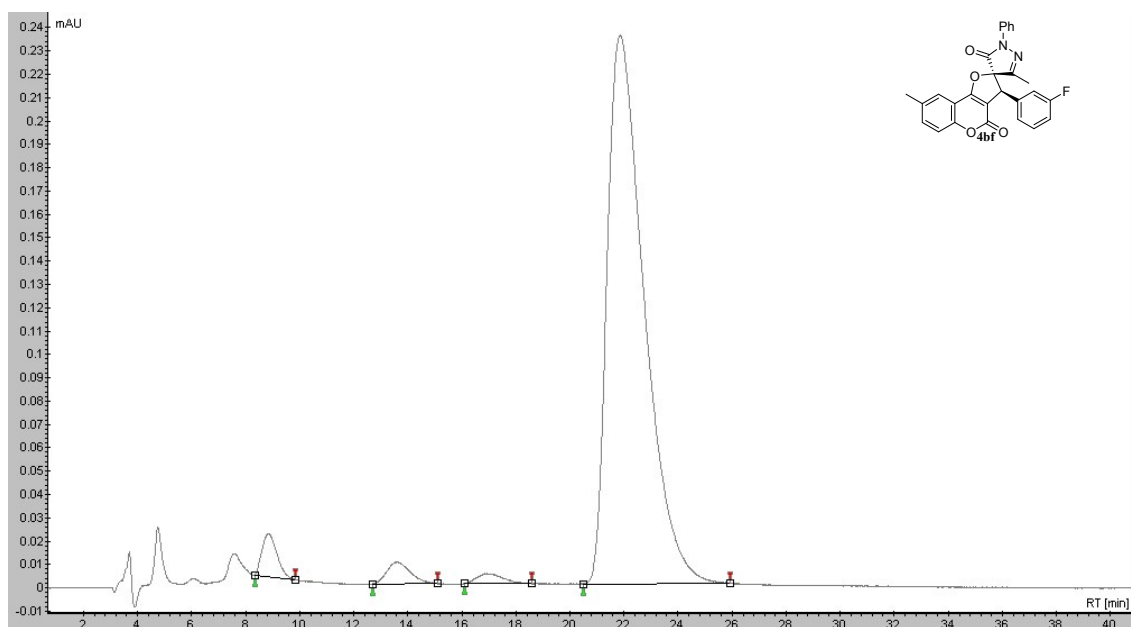

| # | Start time[min] | Time[min] | End time[min] | Area%  |
|---|-----------------|-----------|---------------|--------|
| 1 | 8.333           | 8.839     | 9.856         | 2.957  |
| 2 | 12.690          | 13.599    | 15.101        | 2.342  |
| 3 | 16.116          | 16.972    | 18.612        | 1.188  |
| 4 | 20.516          | 21.865    | 25.930        | 93.513 |

# $^1\text{H}$ NMR, $^{13}\text{C}$ NMR spectra of 4bg

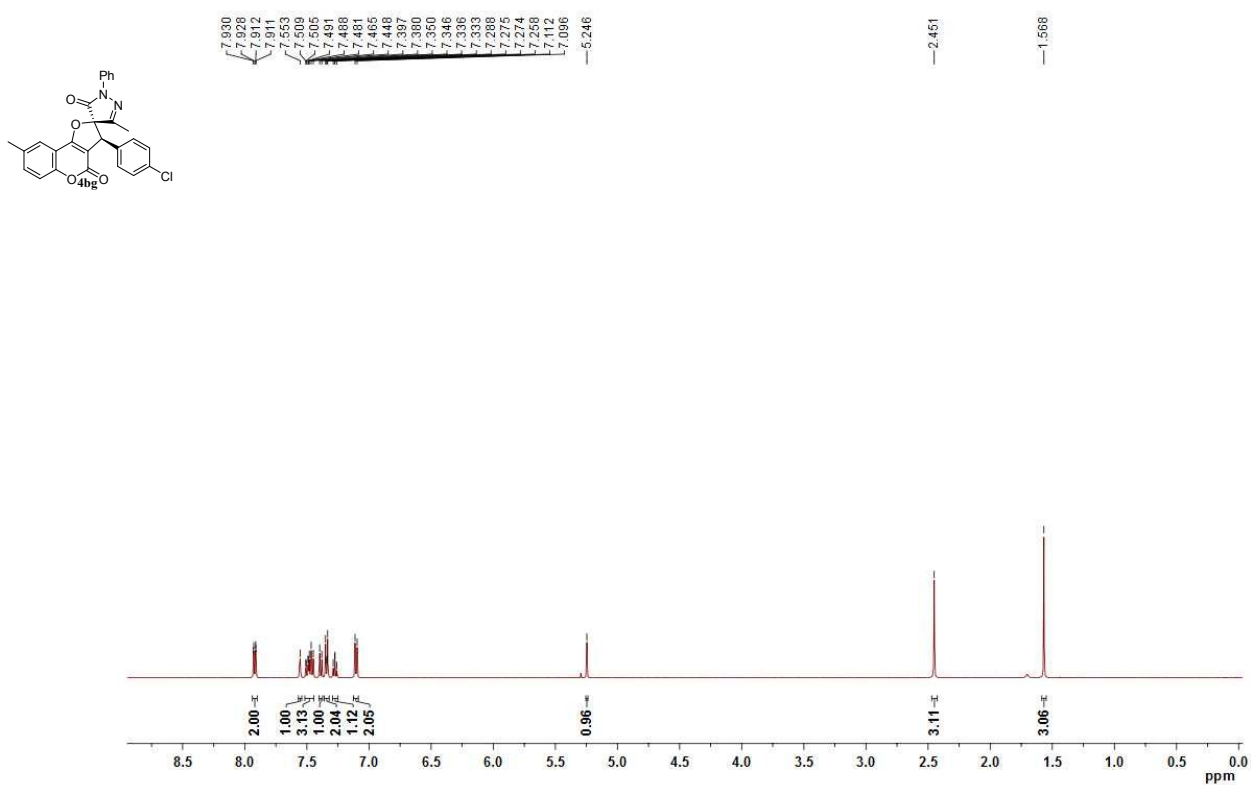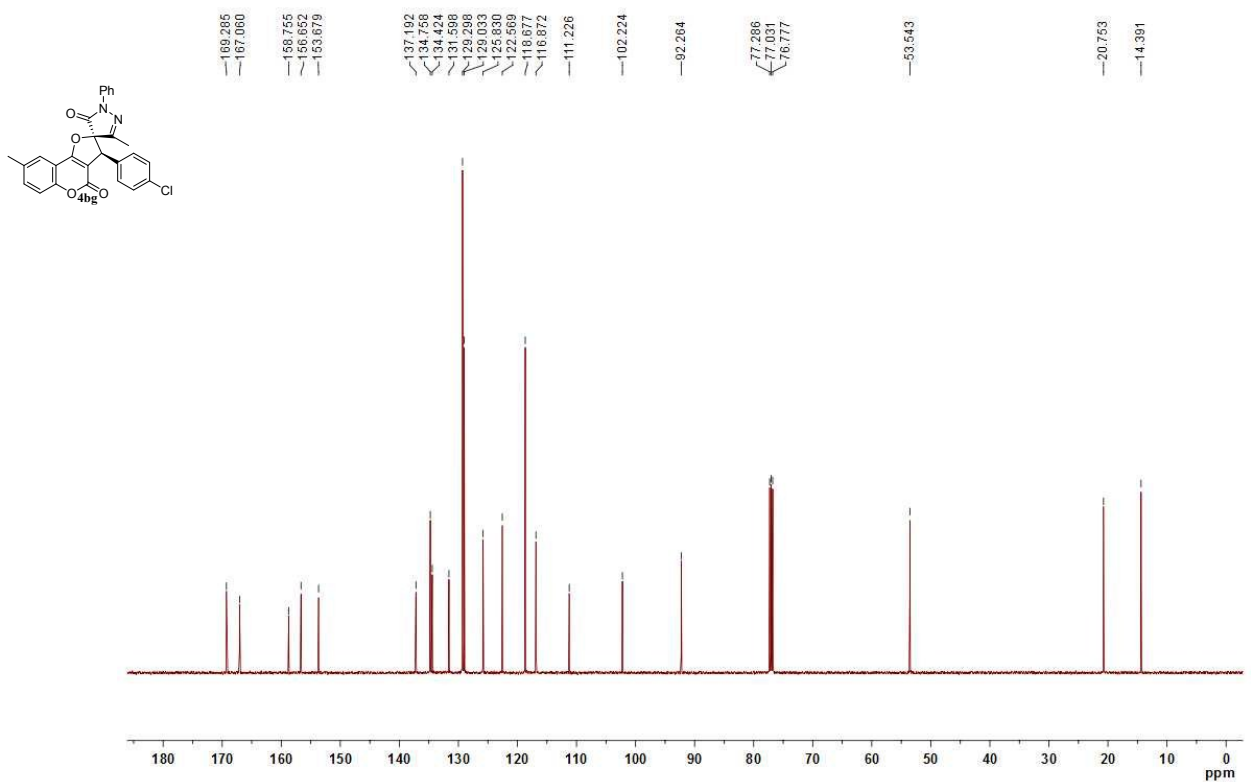

## HPLC chromatogram of 4bg (racemic)

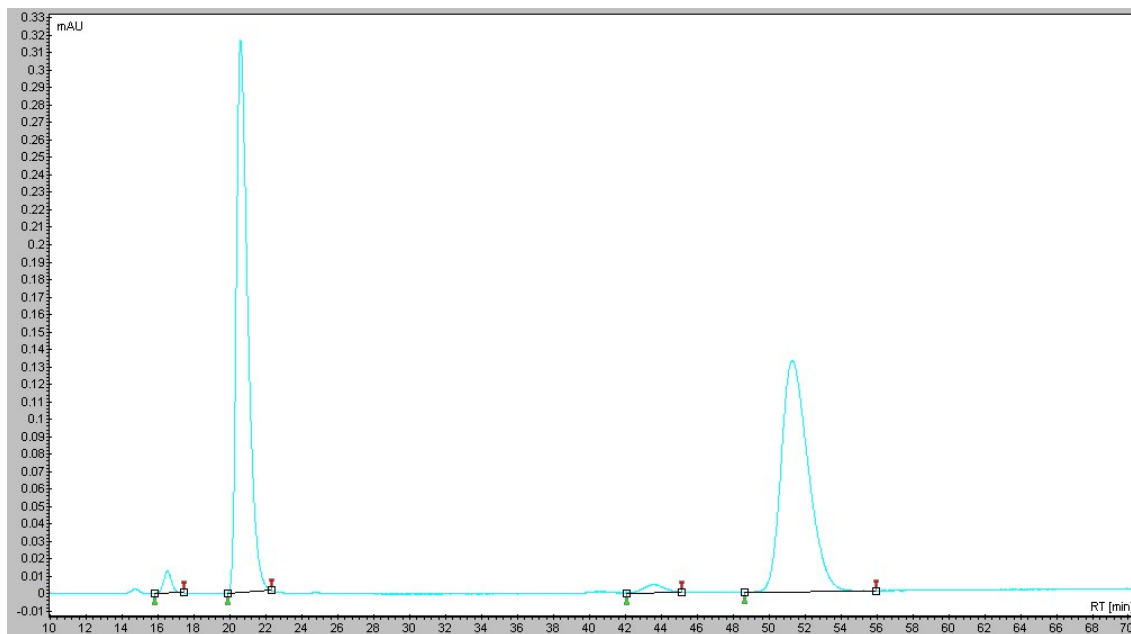

| # | Start time[min] | Time[min] | End time[min] | Area%  |
|---|-----------------|-----------|---------------|--------|
| 1 | 15.793          | 16.501    | 17.418        | 1.373  |
| 2 | 19.855          | 20.566    | 22.291        | 48.934 |
| 3 | 42.056          | 43.544    | 45.124        | 1.287  |
| 4 | 48.644          | 51.302    | 55.954        | 48.407 |

## HPLC chromatogram of 4bg (chiral)

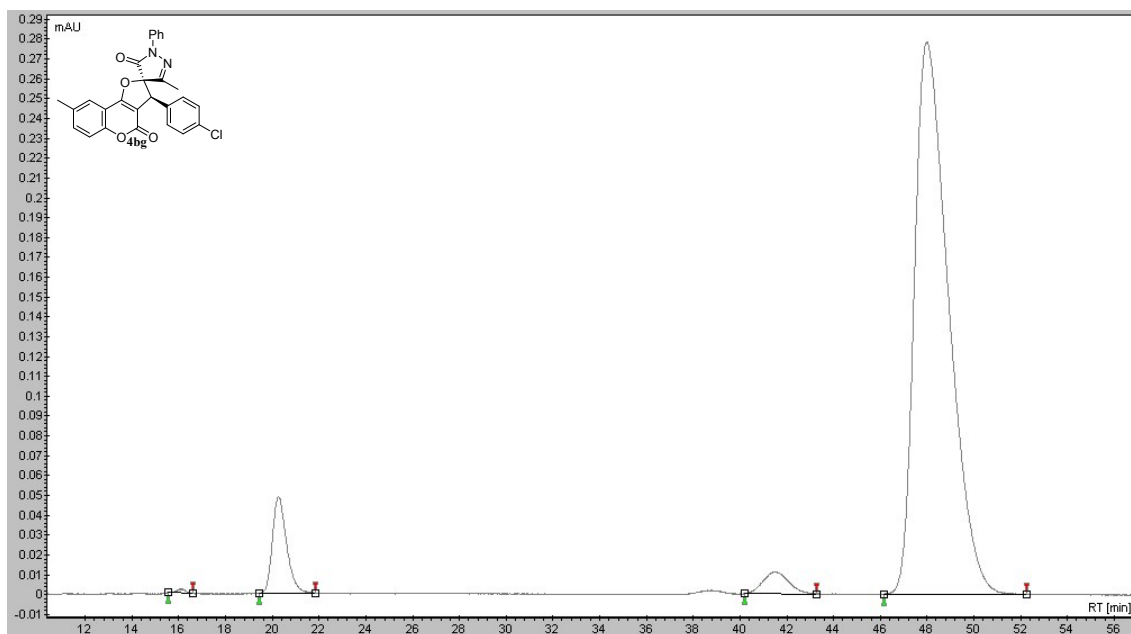

| # | Start time[min] | Time[min] | End time[min] | Area%  |
|---|-----------------|-----------|---------------|--------|
| 1 | 15.542          | 16.092    | 16.601        | 0.166  |
| 2 | 19.427          | 20.265    | 21.841        | 6.596  |
| 3 | 40.209          | 41.504    | 43.270        | 2.706  |
| 4 | 46.154          | 47.983    | 52.277        | 90.531 |

# <sup>1</sup>H NMR, <sup>13</sup>C NMR spectra of 4bh

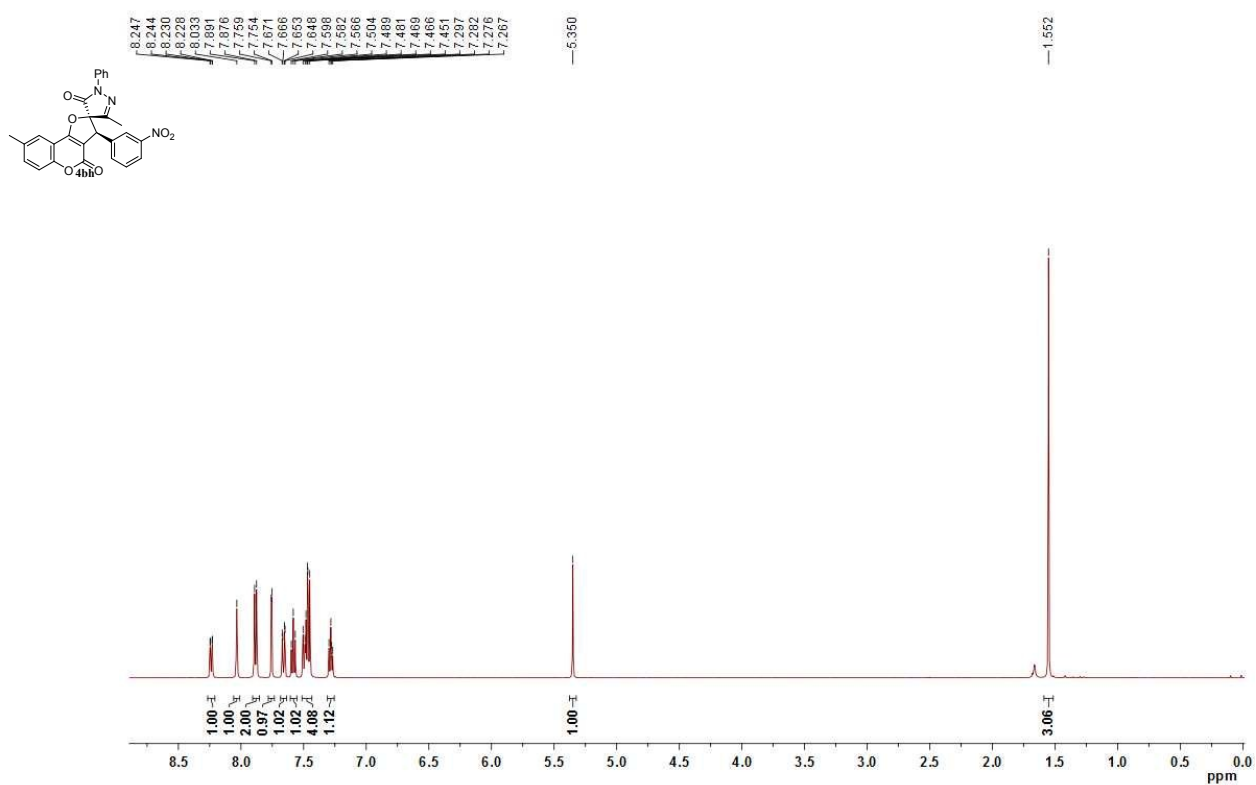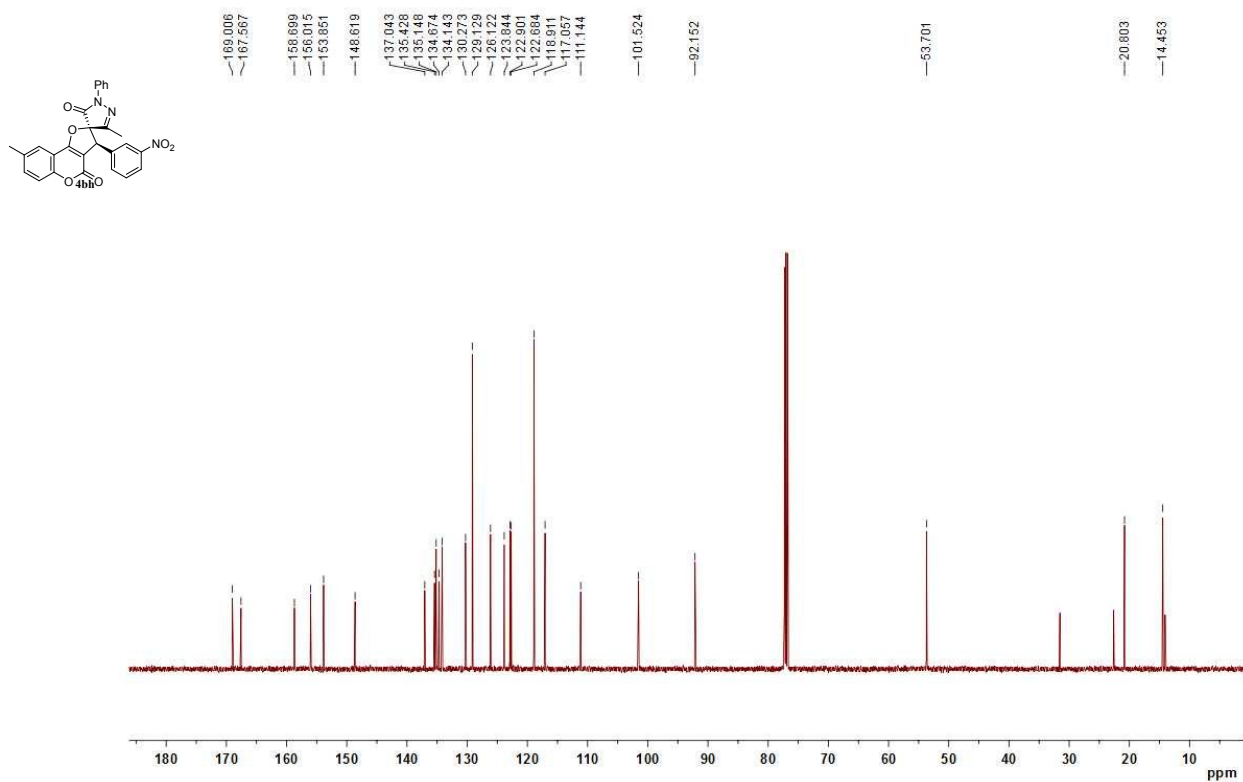

### HPLC chromatogram of 4bh (racemic)

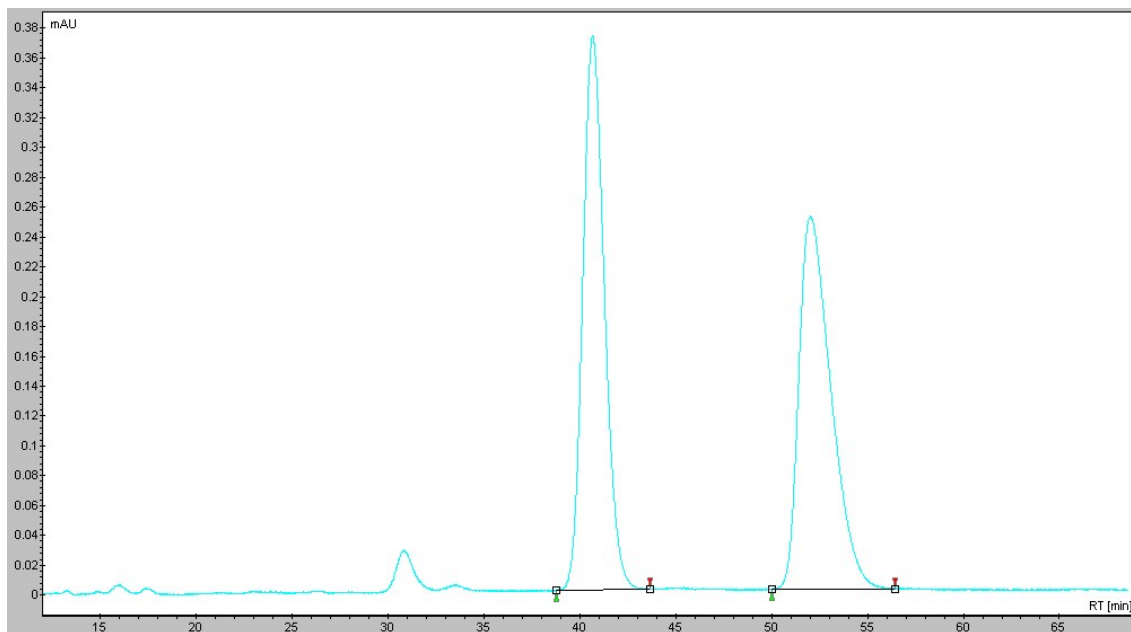

| # | Start time[min] | Time[min] | End time[min] | Area%  |
|---|-----------------|-----------|---------------|--------|
| 1 | 38.772          | 40.639    | 43.663        | 50.074 |
| 2 | 50.042          | 52.021    | 56.422        | 49.926 |

### HPLC chromatogram of 4bh (chiral)

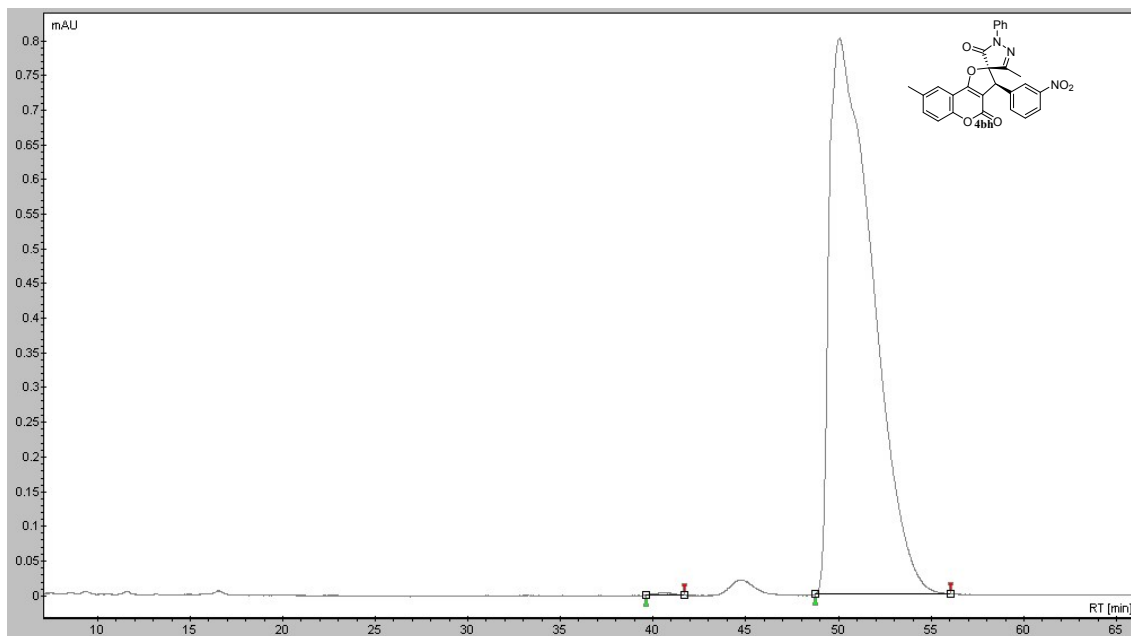

| # | Start time[min] | Time[min] | End time[min] | Area%  |
|---|-----------------|-----------|---------------|--------|
| 1 | 39.607          | 40.572    | 41.684        | 0.200  |
| 2 | 48.747          | 50.062    | 56.086        | 99.800 |

# <sup>1</sup>H NMR, <sup>13</sup>C NMR spectra of 4bi

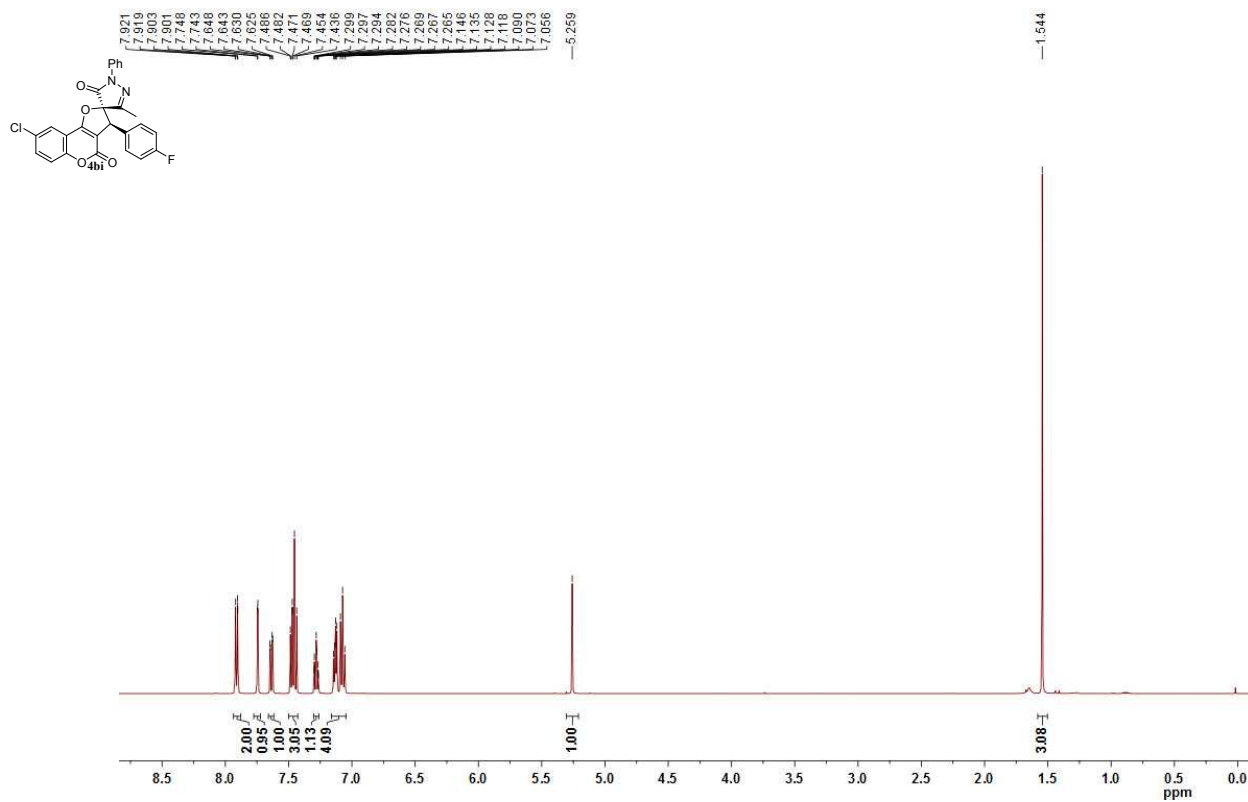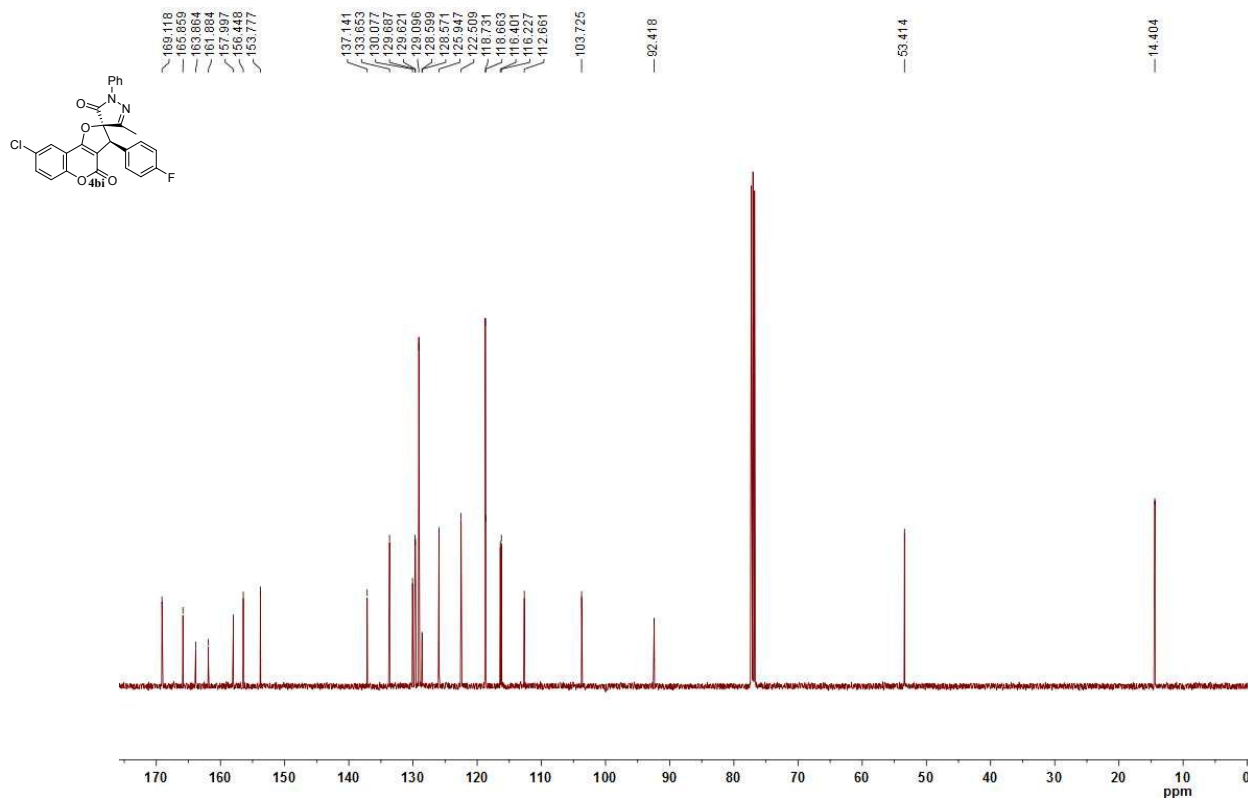

### HPLC chromatogram of 4bi (racemic)

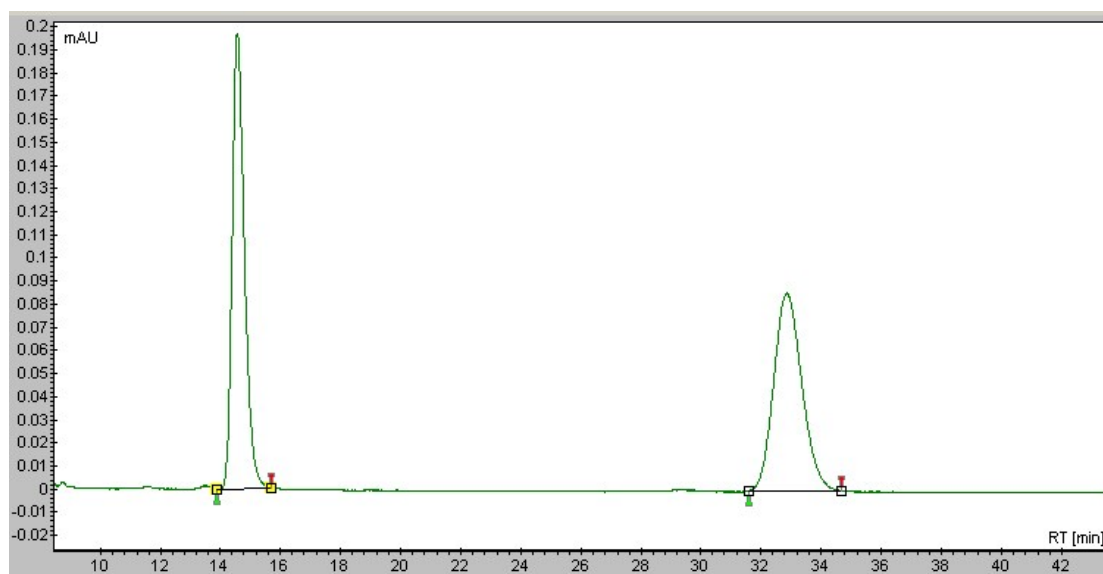

| # | Start [Min] | Time [Min] | End [Min] | Area % [%] |
|---|-------------|------------|-----------|------------|
| 1 | 13.897      | 14.568     | 15.676    | 50.145     |
| 2 | 31.575      | 32.855     | 34.688    | 49.855     |

### HPLC chromatogram of 4bi (chiral)

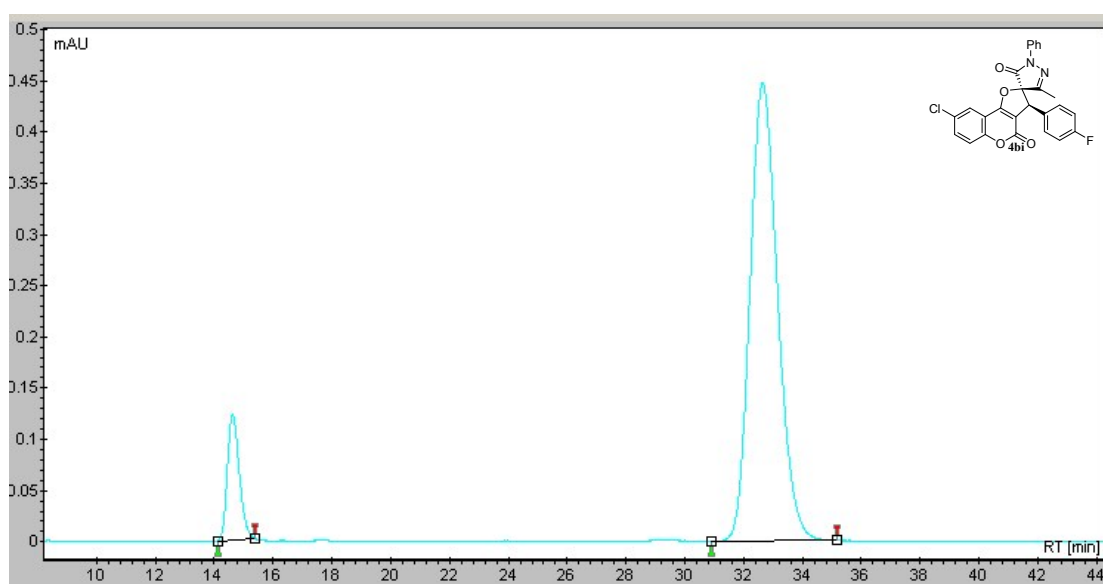

| # | Start [Min] | Time [Min] | End [Min] | Area % [%] |
|---|-------------|------------|-----------|------------|
| 1 | 14.117      | 14.626     | 15.361    | 10.532     |
| 2 | 30.909      | 32.651     | 35.2      | 89.468     |



# <sup>1</sup>H NMR, <sup>13</sup>C NMR spectra of 4bj

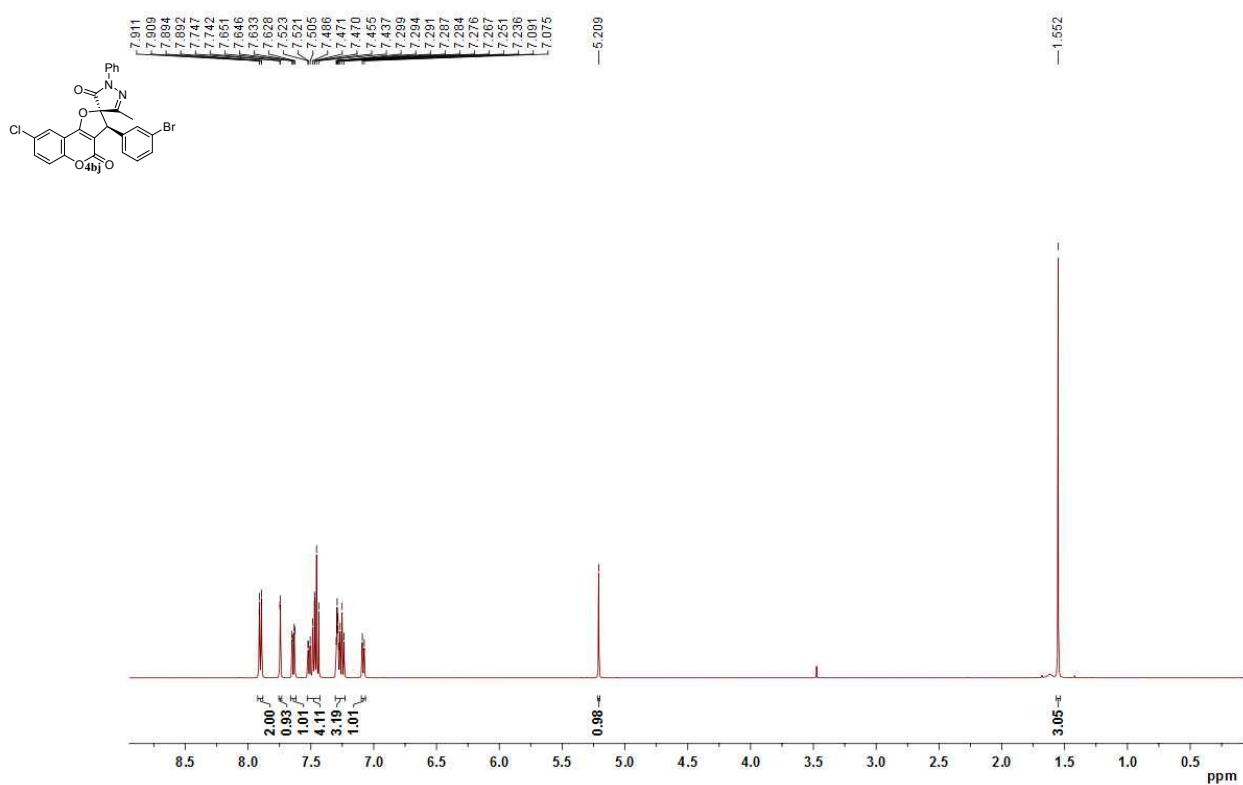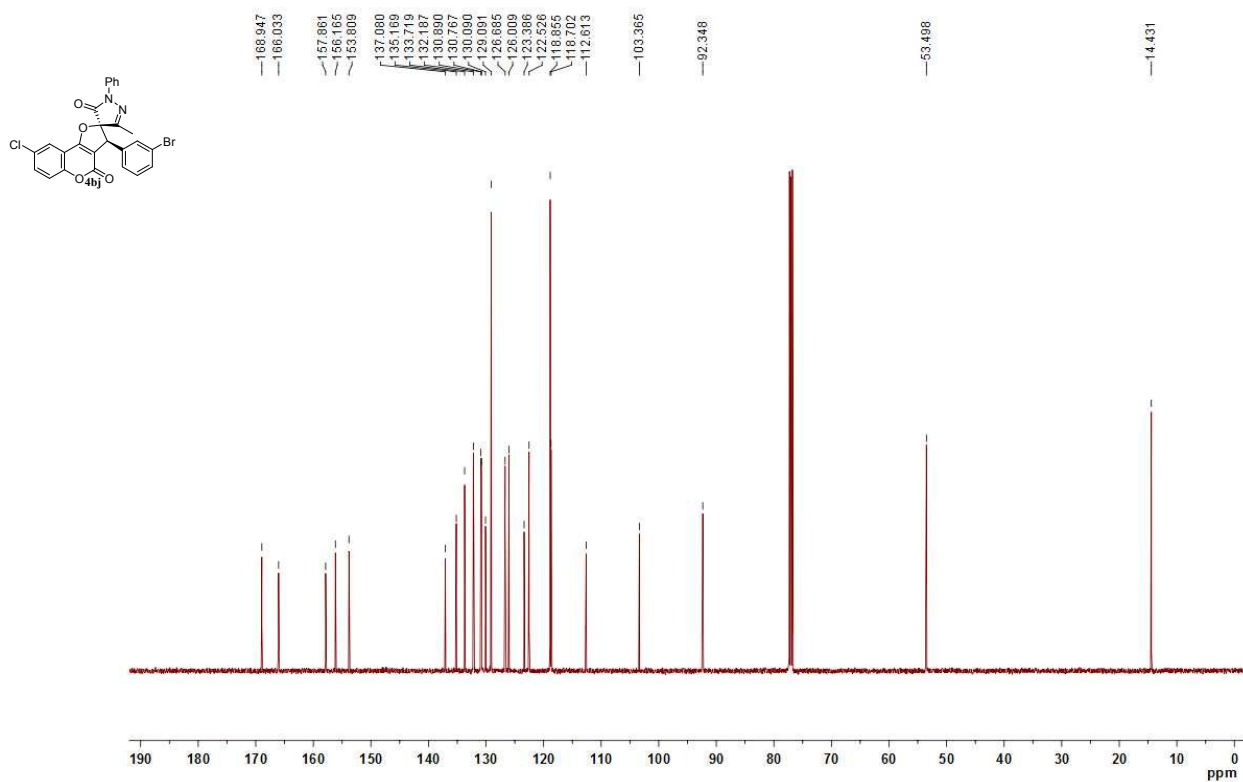

### HPLC chromatogram of 4bj (racemic)

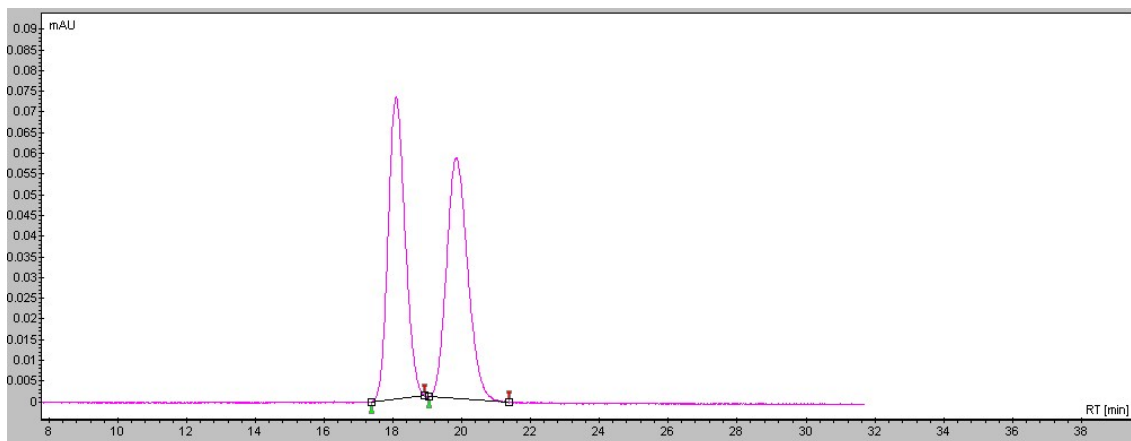

| # | Start [Min] | Time [Min] | End [Min] | Area % [%] |
|---|-------------|------------|-----------|------------|
| 1 | 17.367      | 18.079     | 18.907    | 49.901     |
| 2 | 19.039      | 19.825     | 21.365    | 50.099     |

### HPLC chromatogram of 4bj (chiral)

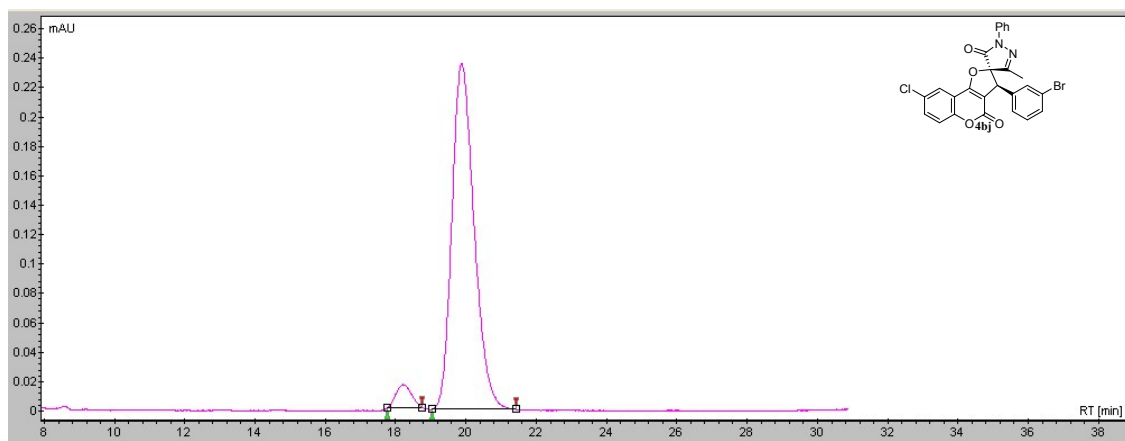

| # | Start [Min] | Time [Min] | End [Min] | Area % [%] |
|---|-------------|------------|-----------|------------|
| 1 | 17.761      | 18.212     | 18.75     | 4.461      |
| 2 | 19.037      | 19.879     | 21.428    | 95.539     |

# $^1\text{H}$ NMR, $^{13}\text{C}$ NMR spectra of 4bk

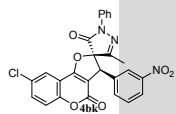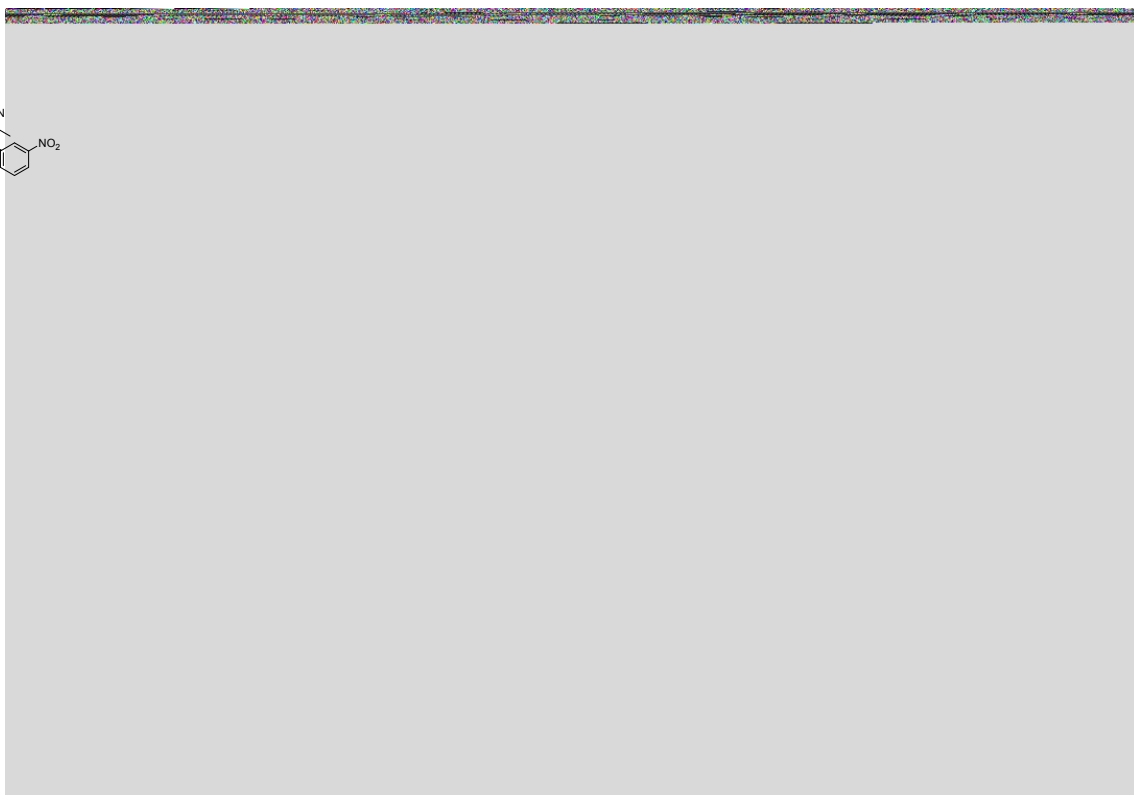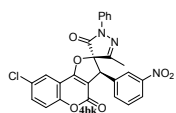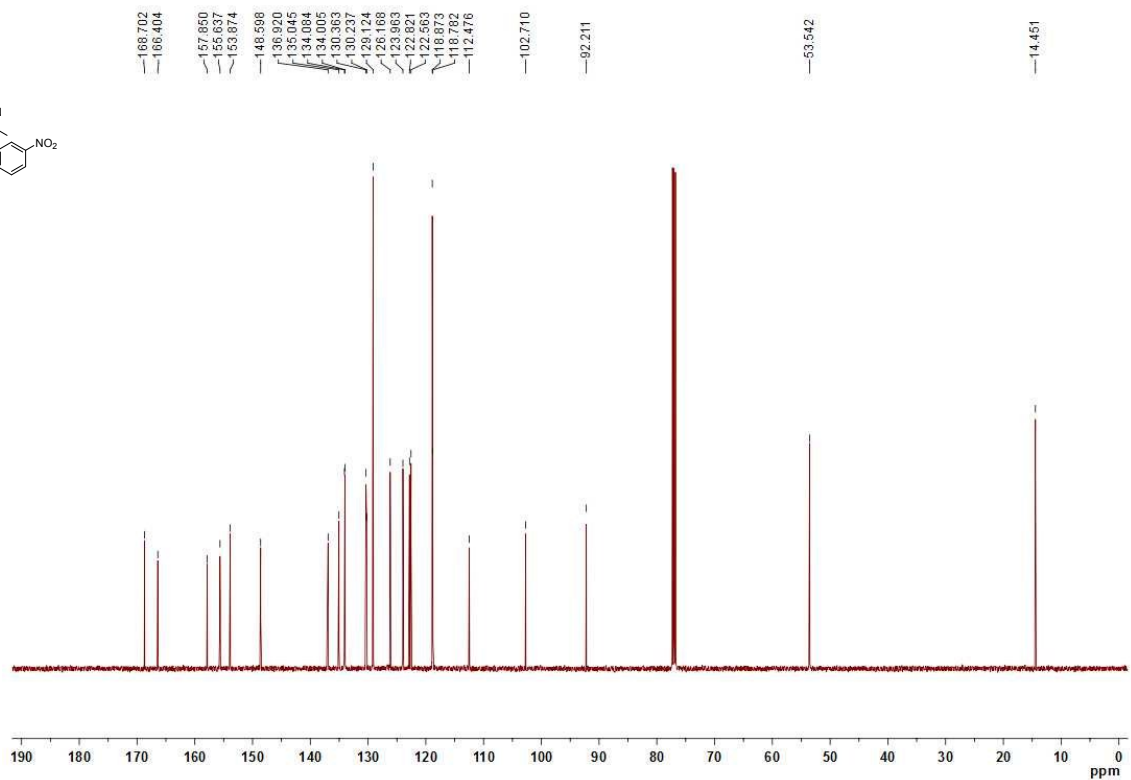

## HPLC chromatogram of 4bk (racemic)

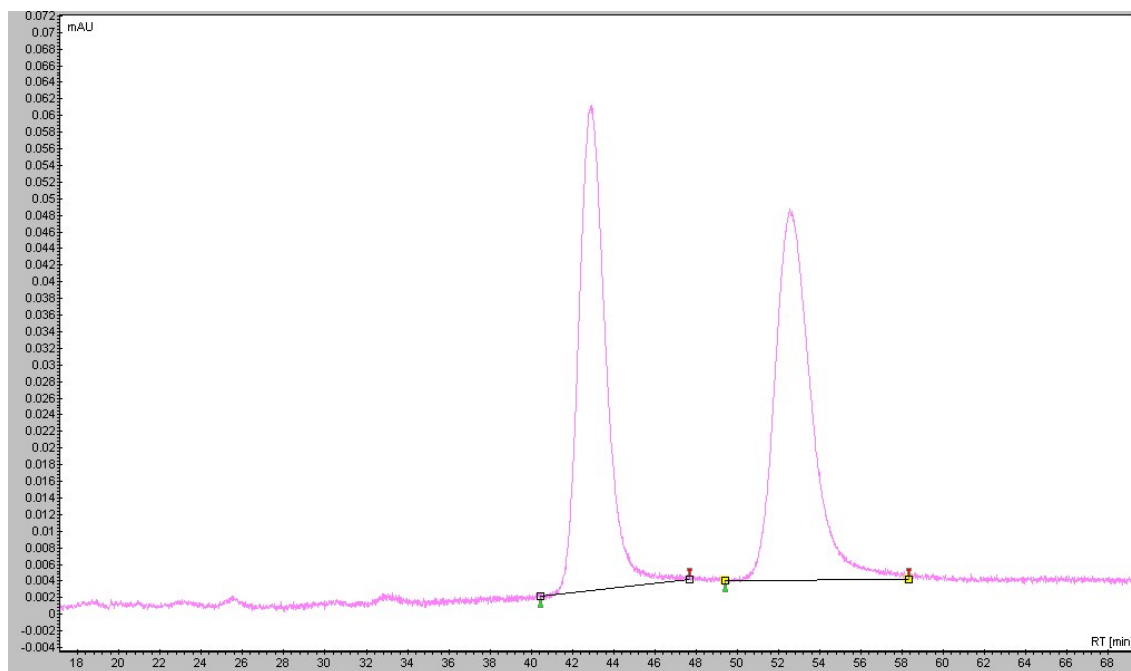

| # | Start time[min] | Time[min] | End time[min] | Area%  |
|---|-----------------|-----------|---------------|--------|
| 1 | 40.473          | 42.905    | 47.700        | 49.293 |
| 2 | 49.435          | 52.581    | 58.324        | 50.707 |

## HPLC chromatogram of 4bk (chiral)

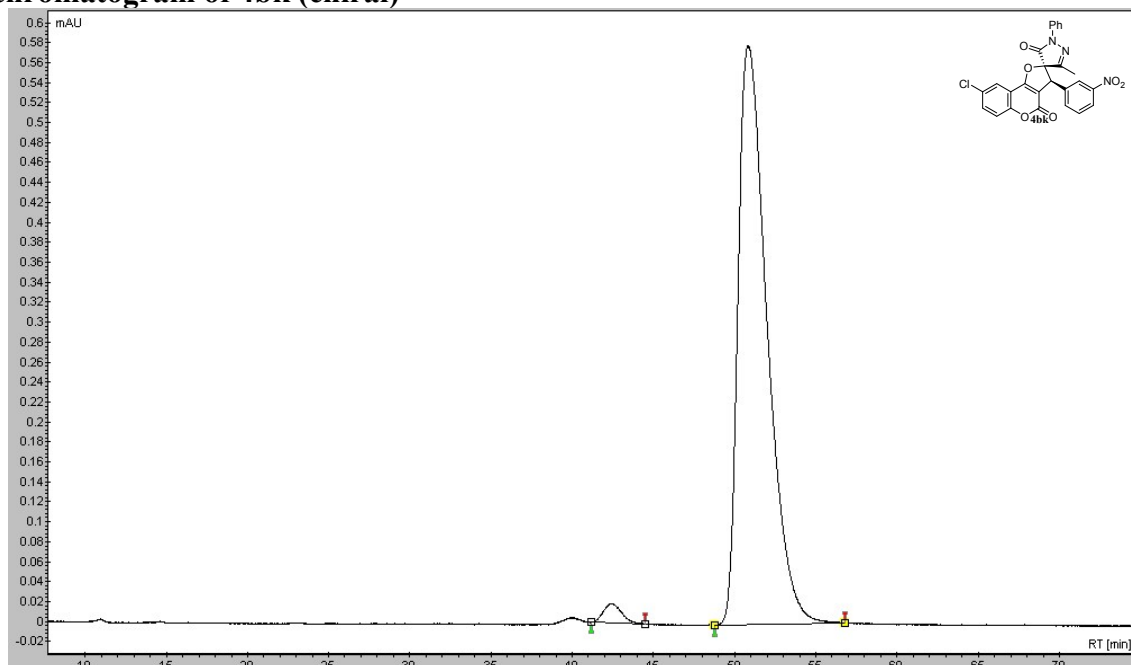

| # | Start time[min] | Time[min] | End time[min] | Area%  |
|---|-----------------|-----------|---------------|--------|
| 1 | 41.150          | 42.478    | 44.455        | 2.059  |
| 2 | 48.762          | 50.795    | 56.767        | 97.941 |

# $^1\text{H}$ NMR, $^{13}\text{C}$ NMR spectra of 5a

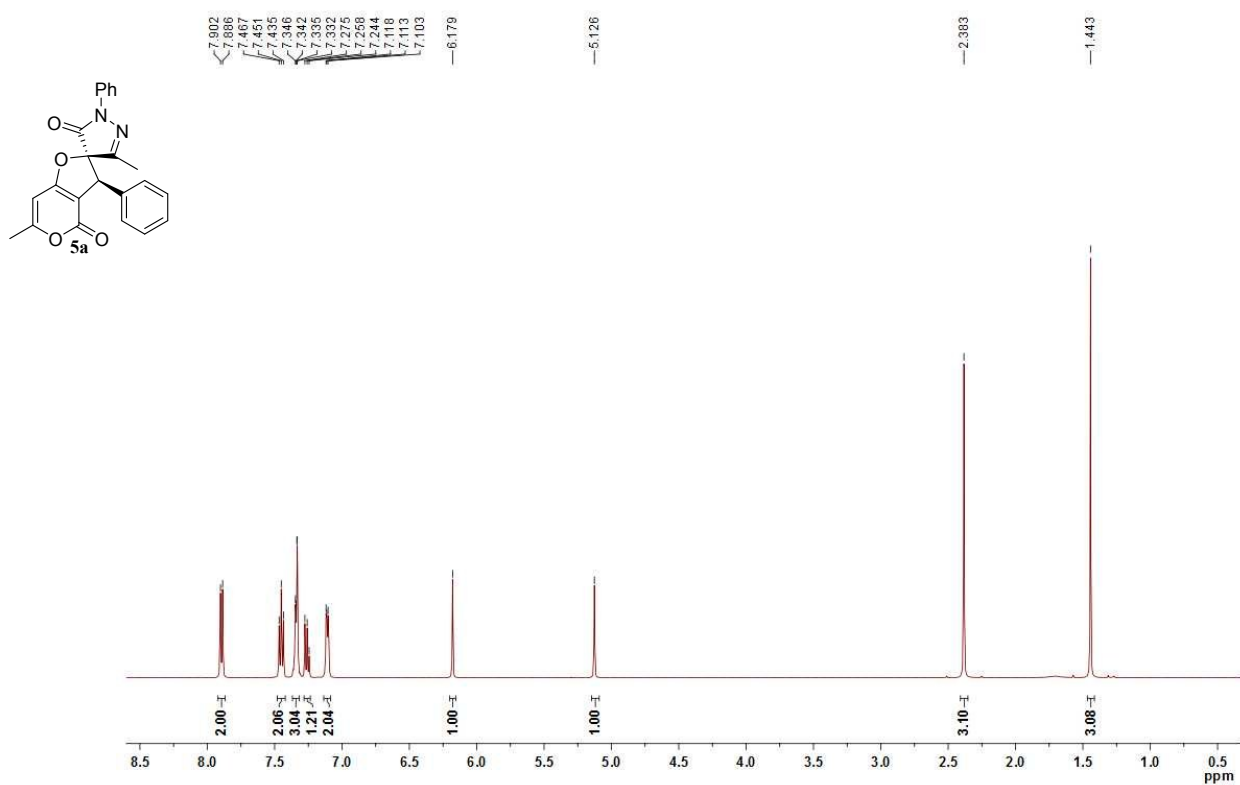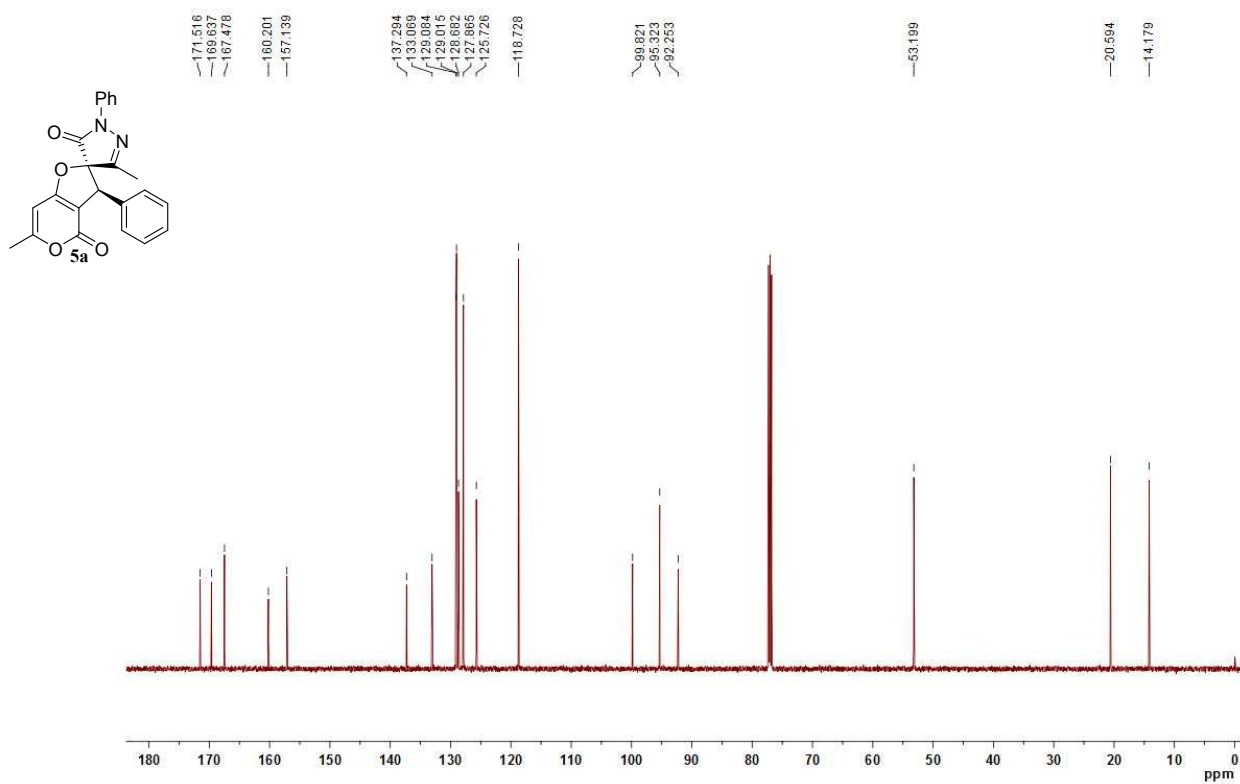

### HPLC chromatogram of 5a (racemic)

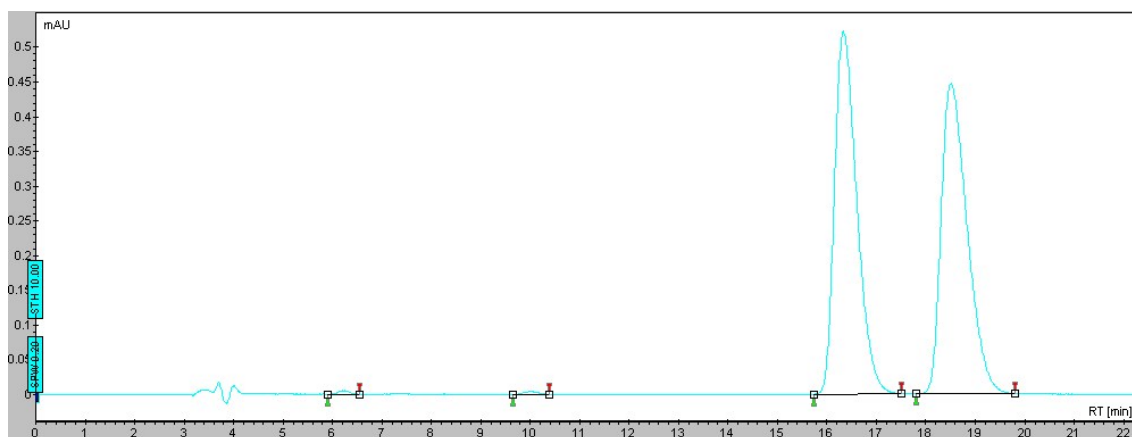

| # | Start time[min] | Time[min] | End time[min] | Area%  |
|---|-----------------|-----------|---------------|--------|
| 1 | 5.905           | 6.213     | 6.548         | 0.24   |
| 2 | 9.65            | 9.999     | 10.385        | 0.239  |
| 3 | 15.738          | 16.332    | 17.507        | 49.822 |
| 4 | 17.806          | 18.505    | 19.805        | 49.7   |

### HPLC chromatogram of 5a (chiral)

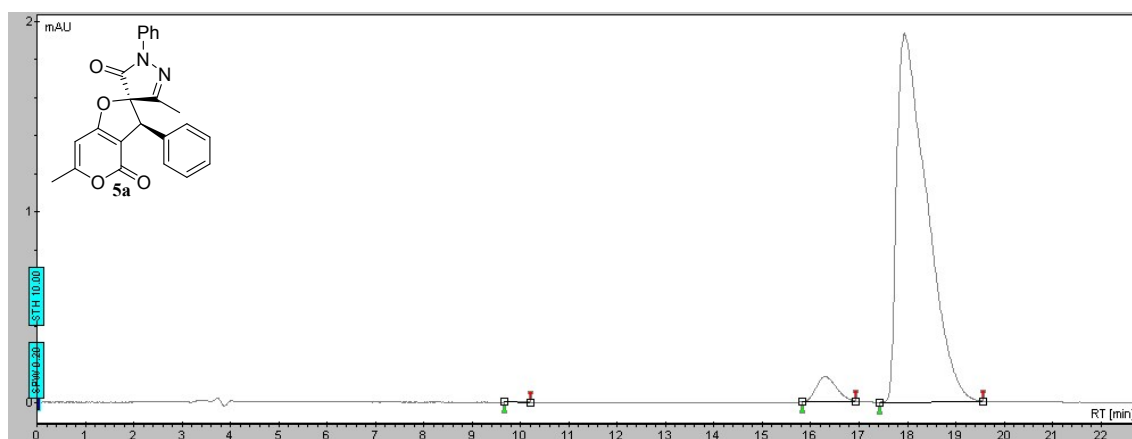

| # | Start time[min] | Time[min] | End time[min] | Area%  |
|---|-----------------|-----------|---------------|--------|
| 1 | 9.664           | 9.879     | 10.204        | 0.026  |
| 2 | 15.824          | 16.292    | 16.929        | 4.363  |
| 3 | 17.423          | 17.932    | 19.562        | 95.611 |

# $^1\text{H}$ NMR, $^{13}\text{C}$ NMR spectra of 5b

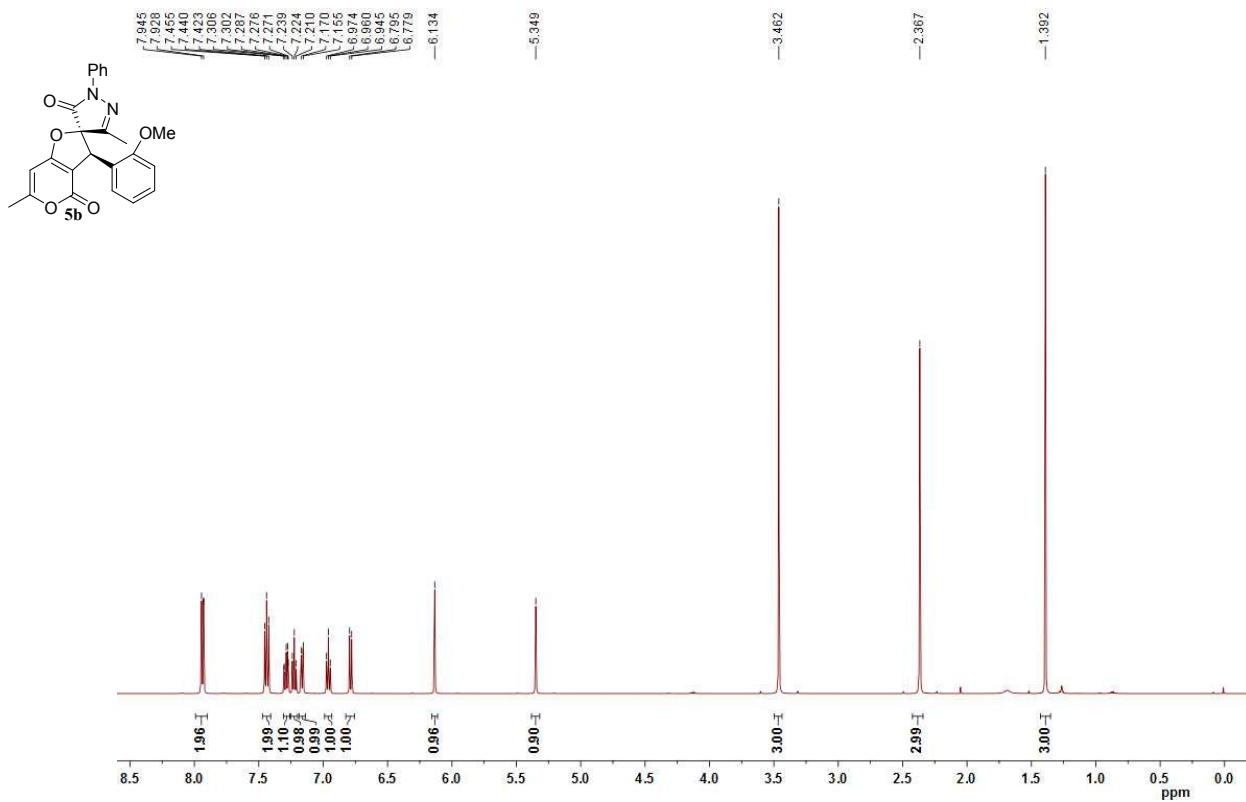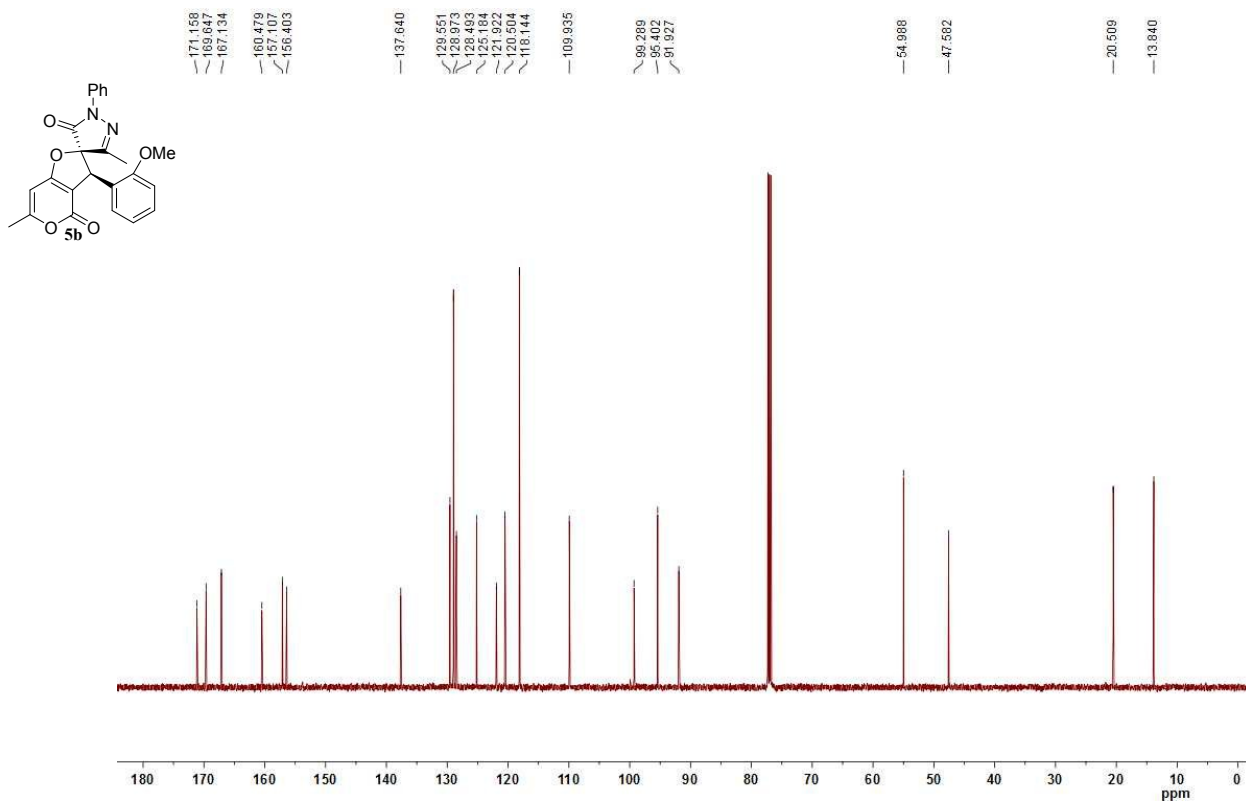

### HPLC chromatogram of 5b (racemic)

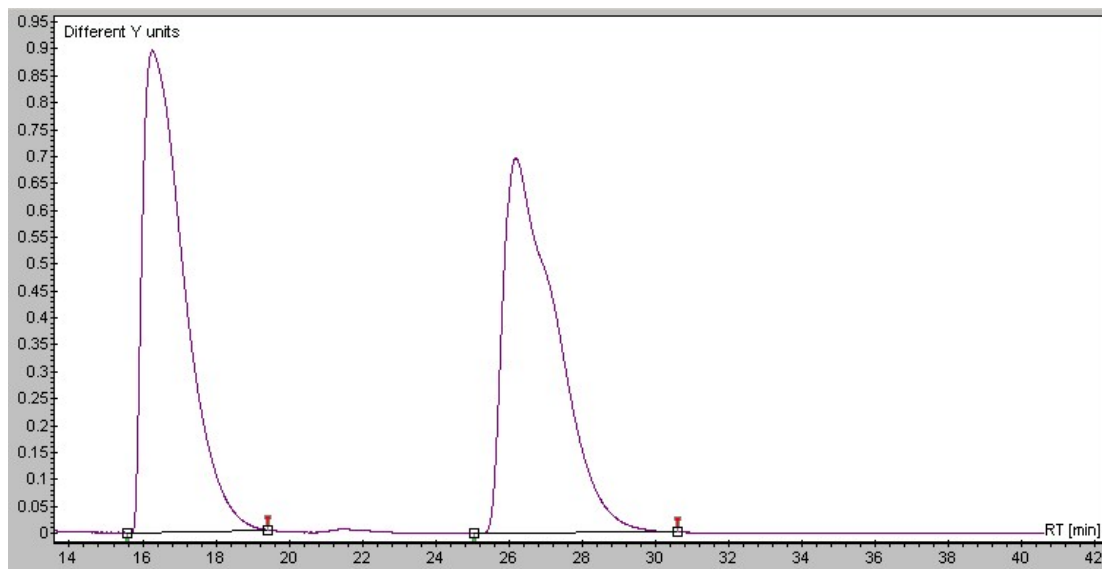

| # | Start time[min] | Time[min] | End time[min] | Area%  |
|---|-----------------|-----------|---------------|--------|
| 1 | 15.56           | 16.252    | 19.408        | 50.314 |
| 2 | 25.066          | 26.185    | 30.611        | 49.686 |

### HPLC chromatogram of 5b (chiral)

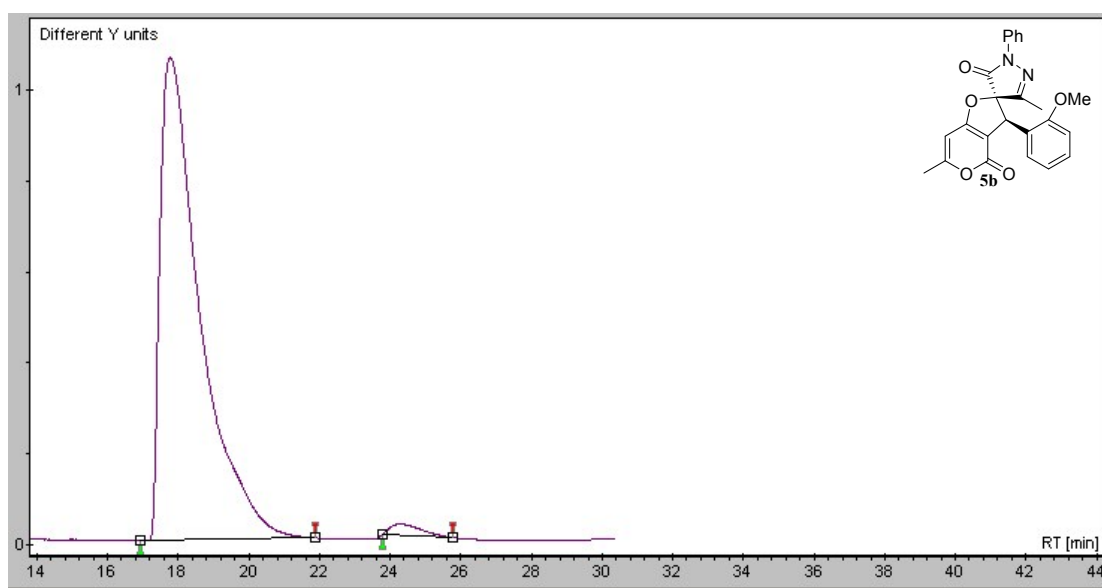

| # | Start time[min] | Time[min] | End time[min] | Area%  |
|---|-----------------|-----------|---------------|--------|
| 1 | 16.929          | 17.772    | 21.88         | 98.221 |
| 2 | 23.785          | 24.305    | 25.774        | 1.779  |



# <sup>1</sup>H NMR, <sup>13</sup>C NMR spectra of 5c

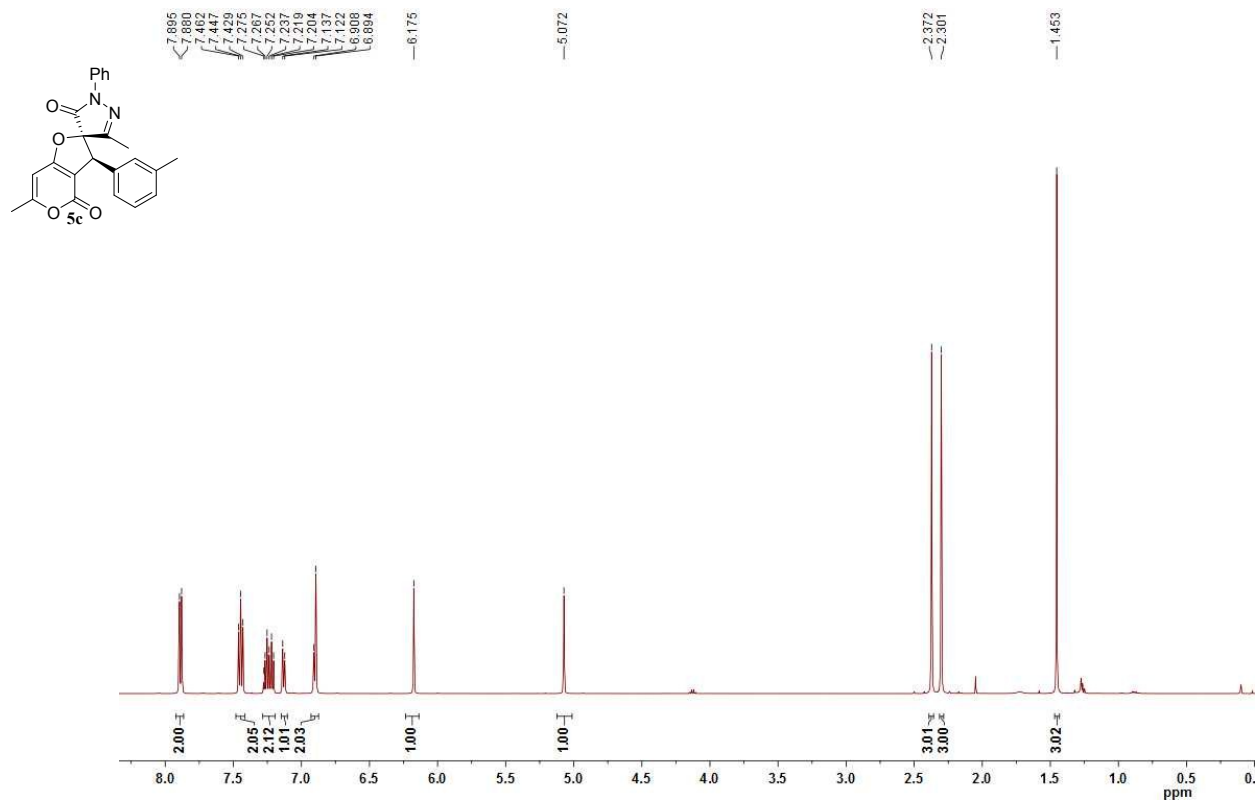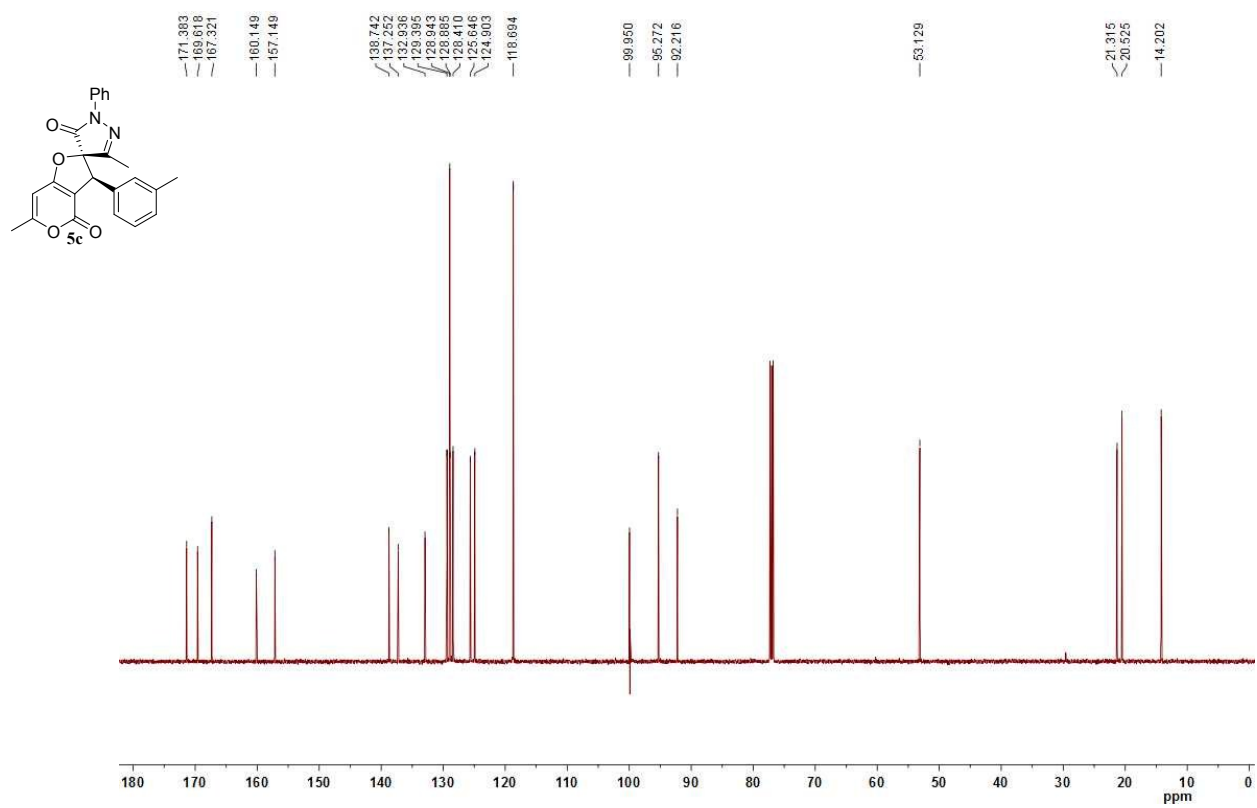

### HPLC chromatogram of 5c (racemic)

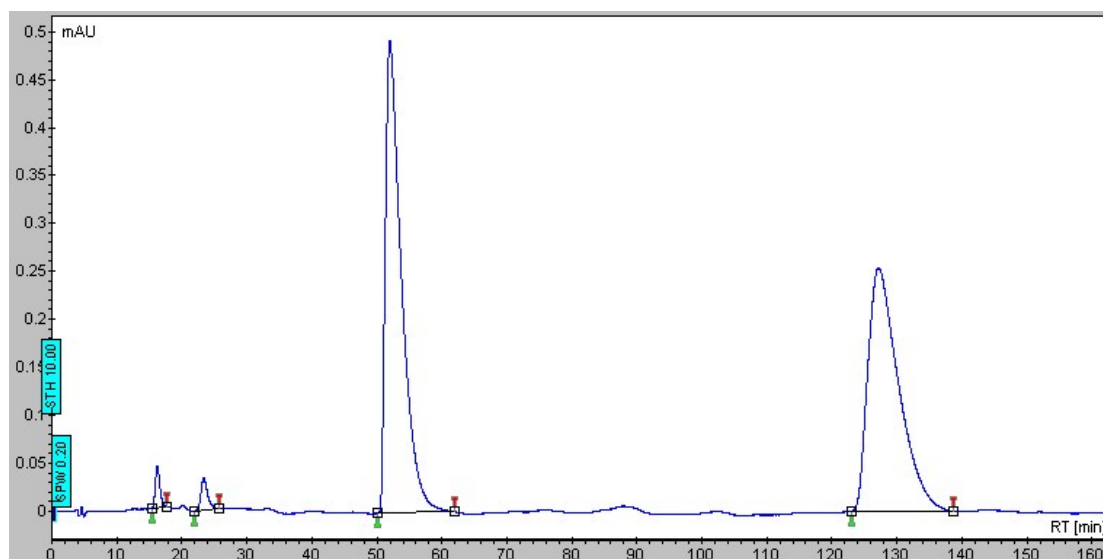

| # | Start time[min] | Time[min] | End time[min] | Area%  |
|---|-----------------|-----------|---------------|--------|
| 1 | 15.435          | 16.225    | 17.672        | 1.225  |
| 2 | 21.923          | 23.365    | 25.725        | 1.324  |
| 3 | 50.109          | 52.005    | 61.965        | 49.319 |
| 4 | 123.035         | 127.188   | 138.694       | 48.132 |

### HPLC chromatogram of 5c (chiral)

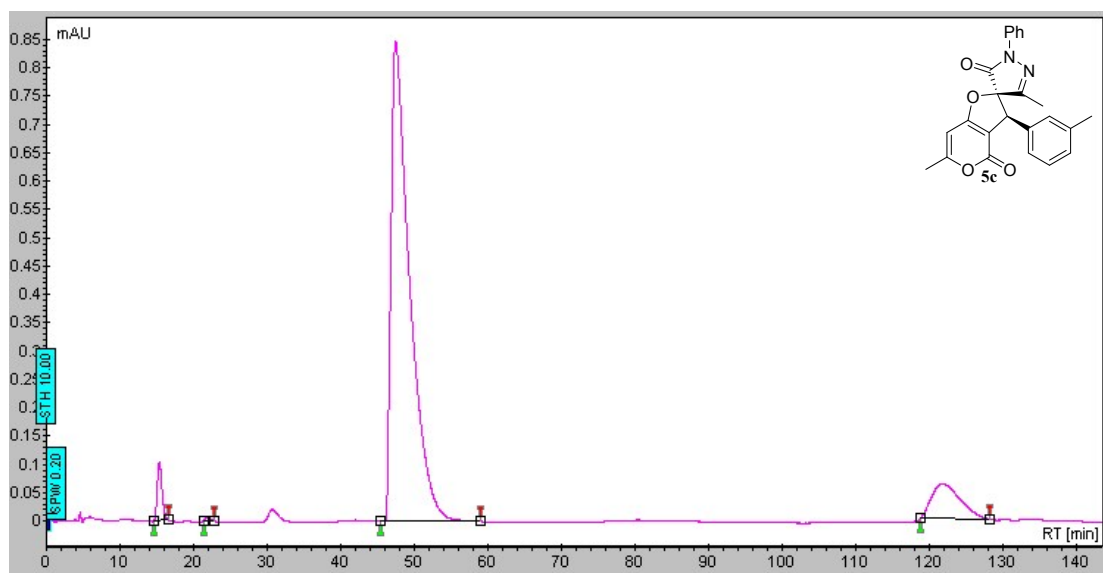

| # | Start time[min] | Time[min] | End time[min] | Area%  |
|---|-----------------|-----------|---------------|--------|
| 1 | 14.591          | 15.332    | 16.589        | 2.752  |
| 2 | 21.386          | 21.913    | 22.785        | 0.166  |
| 3 | 45.37           | 47.409    | 58.962        | 87.239 |
| 4 | 118.723         | 121.753   | 128.117       | 9.843  |

# <sup>1</sup>H NMR, <sup>13</sup>C NMR spectra of 5d

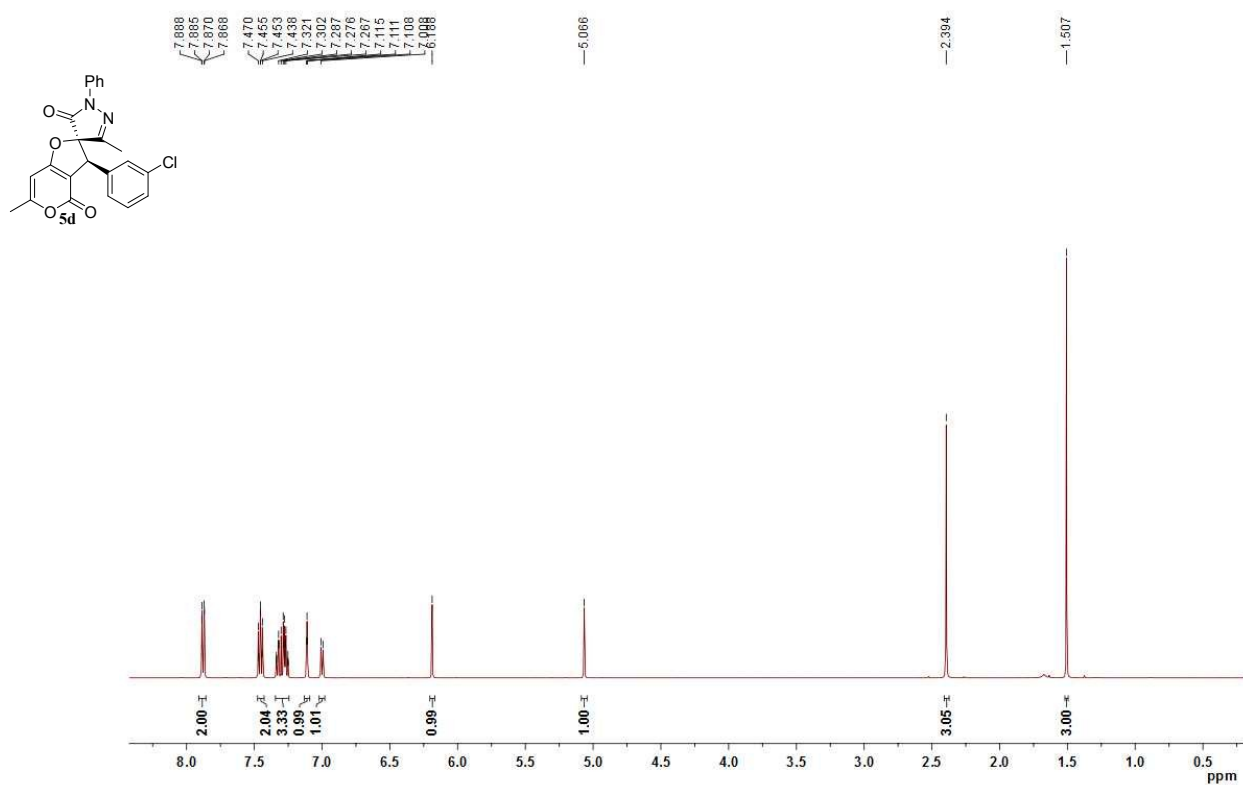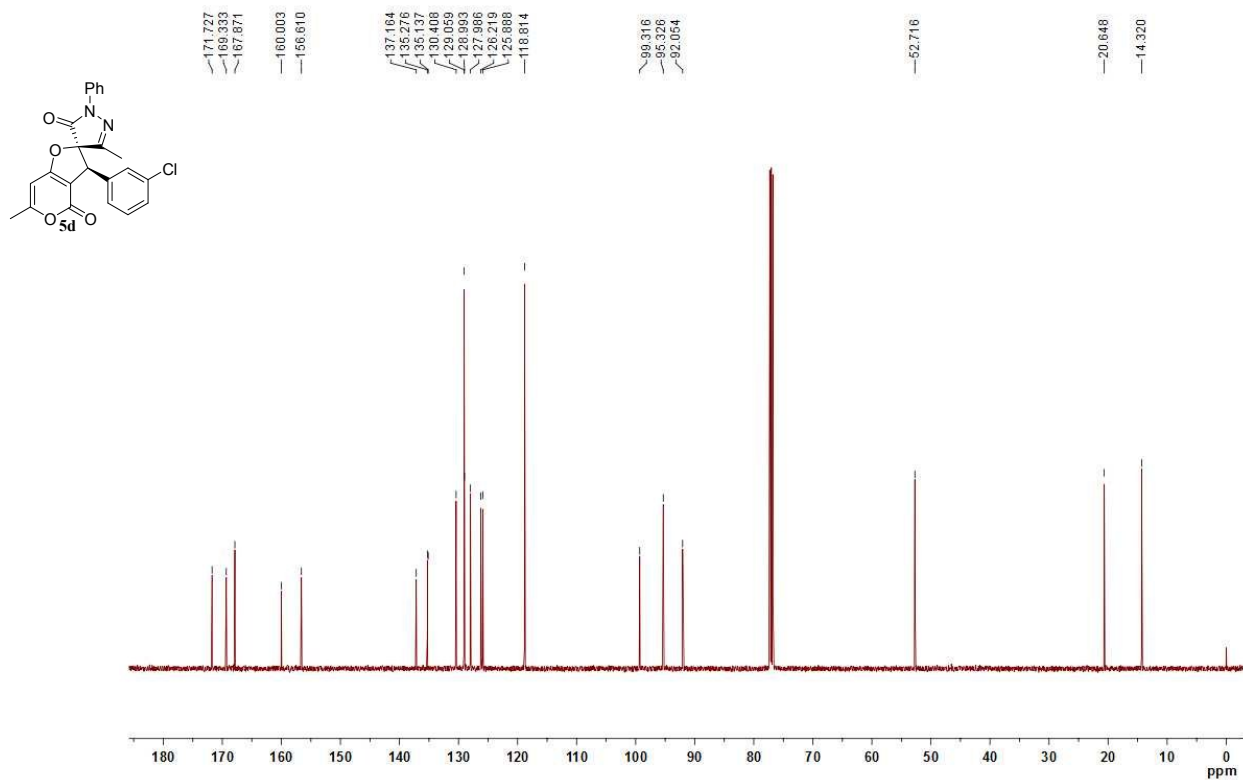

### HPLC chromatogram of 5d (racemic)

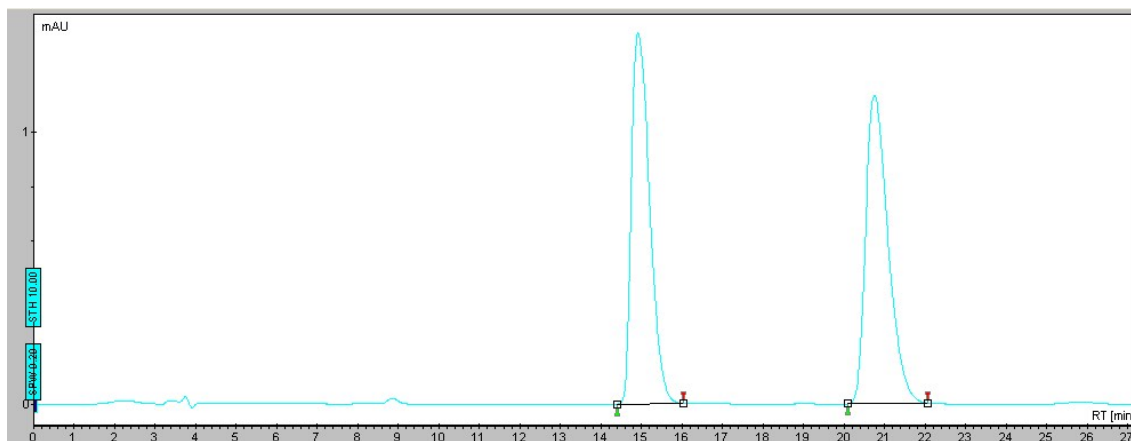

| # | Start time[min] | Time[min] | End time[min] | Area%  |
|---|-----------------|-----------|---------------|--------|
| 1 | 14.401          | 14.919    | 16.035        | 49.462 |
| 2 | 20.094          | 20.745    | 22.066        | 50.538 |

### HPLC chromatogram of 5d (chiral)

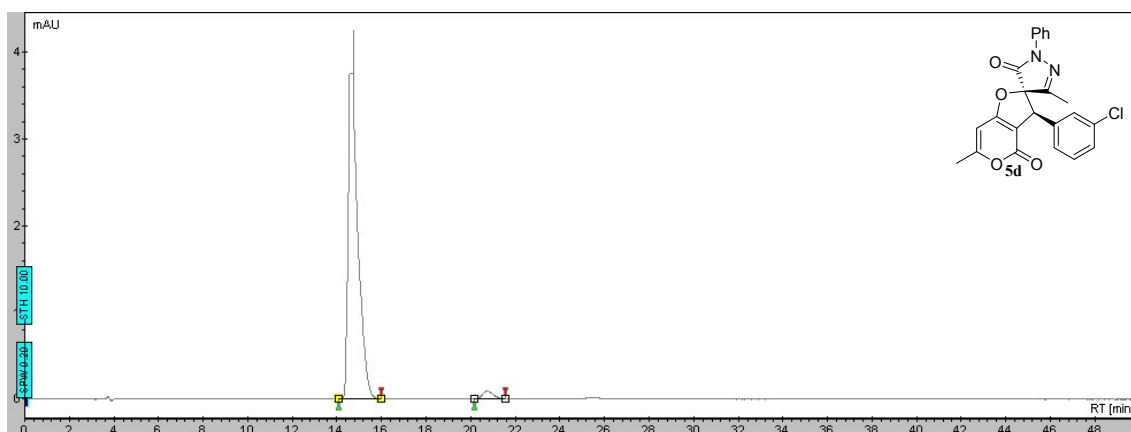

| # | Start time[min] | Time[min] | End time[min] | Area%  |
|---|-----------------|-----------|---------------|--------|
| 1 | 14.079          | 14.746    | 15.987        | 97.344 |
| 2 | 20.164          | 20.745    | 21.556        | 2.656  |

# $^1\text{H}$ NMR, $^{13}\text{C}$ NMR spectra of 5e

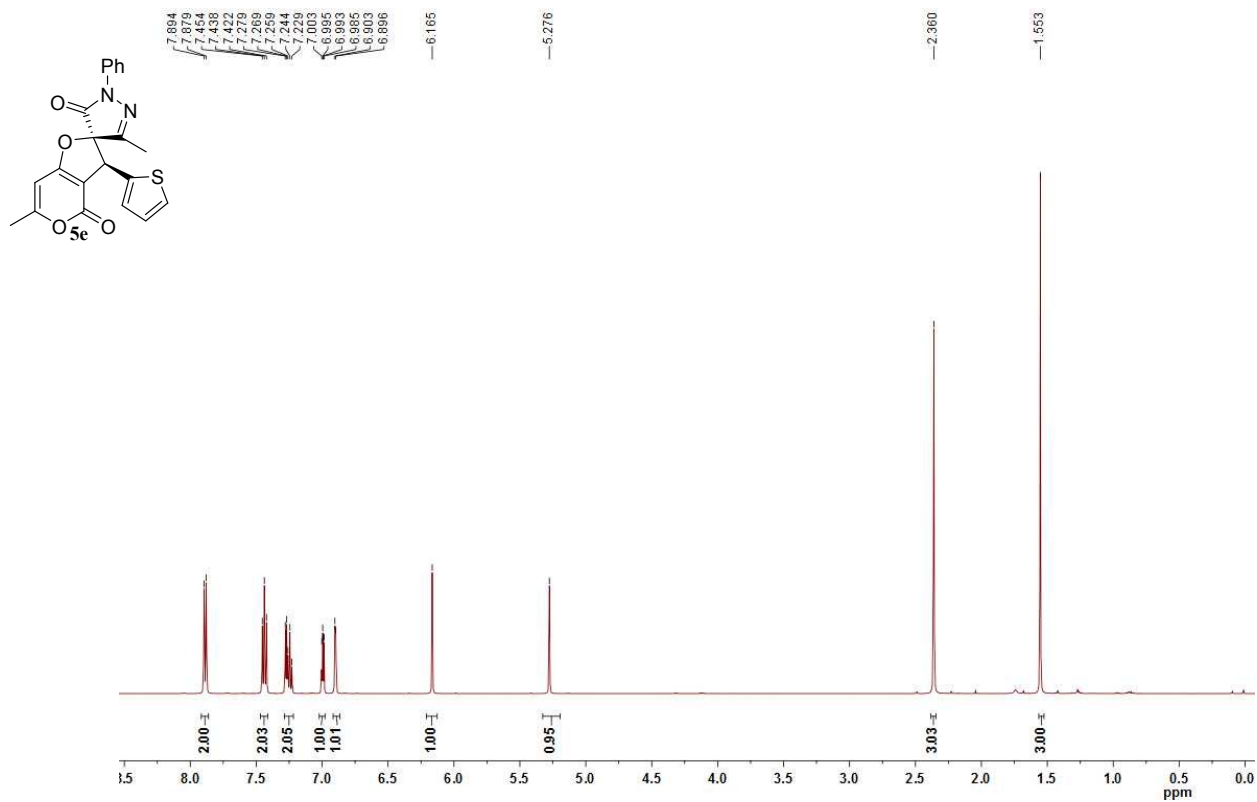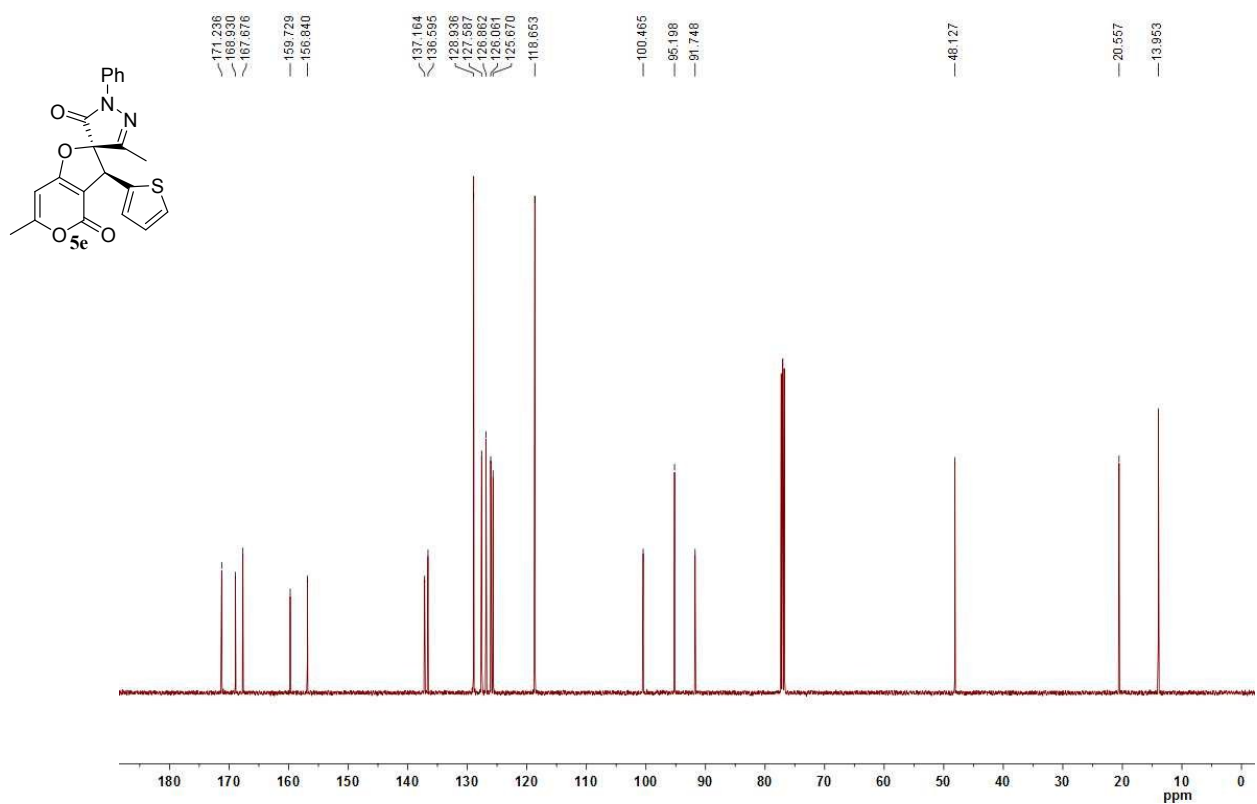

### HPLC chromatogram of 5e (racemic)

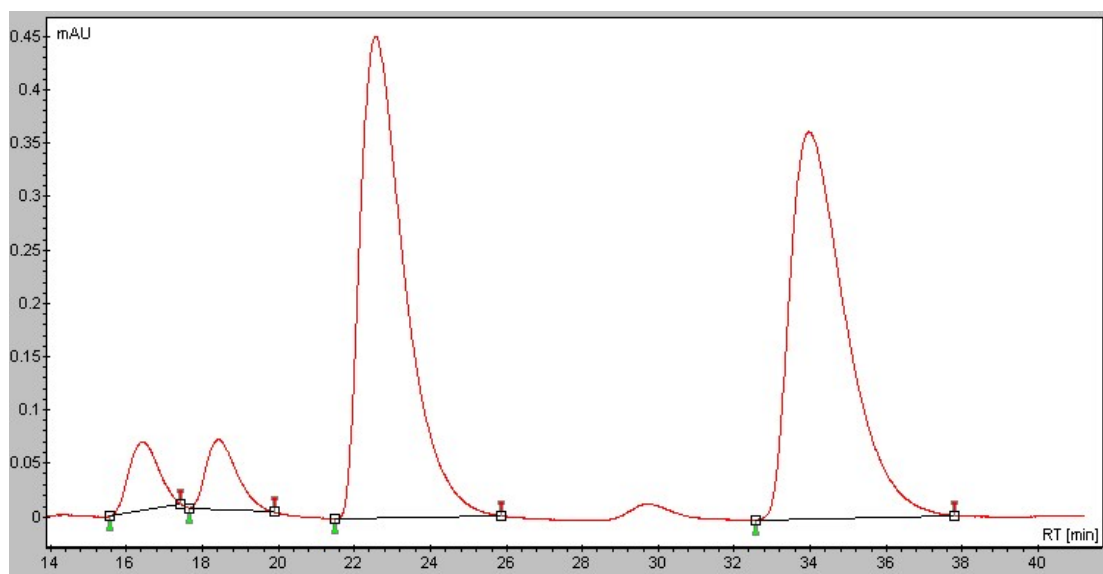

| # | Start time[min] | Time[min] | End time[min] | Area%  |
|---|-----------------|-----------|---------------|--------|
| 1 | 15.571          | 16.412    | 17.409        | 4.254  |
| 2 | 17.639          | 18.425    | 19.88         | 4.548  |
| 3 | 21.489          | 22.558    | 25.855        | 45.516 |
| 4 | 32.577          | 33.958    | 37.806        | 45.682 |

### HPLC chromatogram of 5e (chiral)

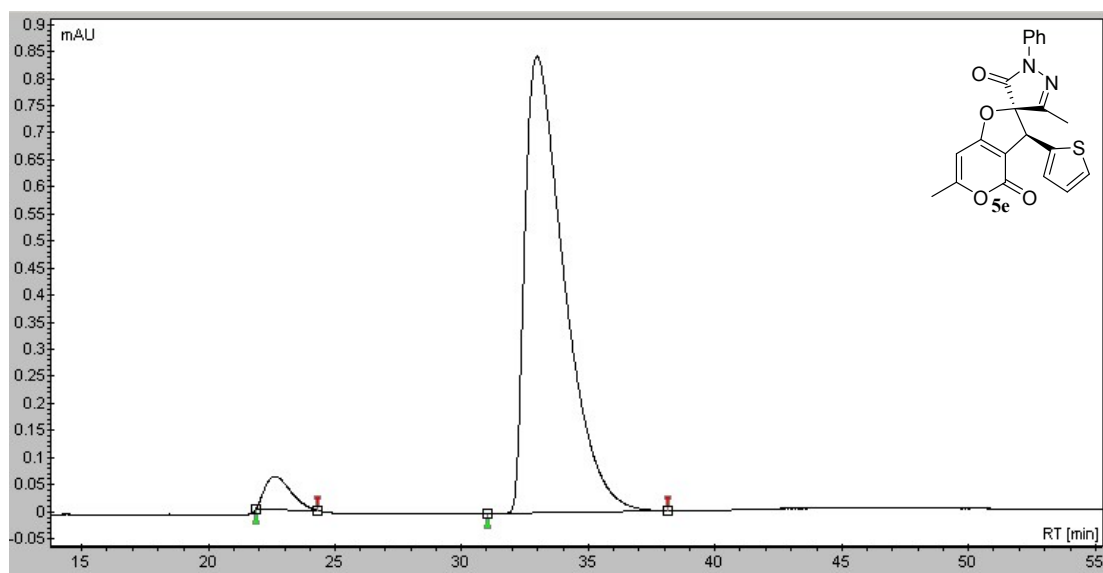

| # | Start time[min] | Time[min] | End time[min] | Area%  |
|---|-----------------|-----------|---------------|--------|
| 1 | 21.896          | 22.625    | 24.329        | 4.549  |
| 2 | 31.02           | 32.998    | 38.144        | 95.451 |

## 5. X-ray crystal structure of compound 4aj, 4al and 4ap.

### 5.1 X-ray crystal structure of compound 4aj.

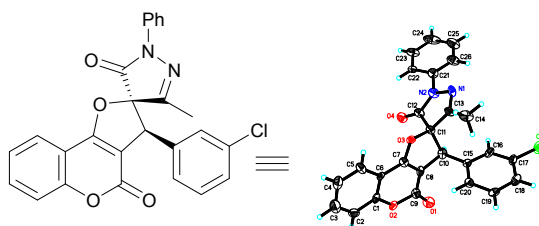

**Table S2.** Crystal data and structure refinement parameters of compound (4aj)

| Parameter                       | Value                                                                                 |
|---------------------------------|---------------------------------------------------------------------------------------|
| CCDC deposition number          | 1553767                                                                               |
| Empirical formula               | C <sub>26</sub> H <sub>17</sub> ClN <sub>2</sub> O <sub>4</sub>                       |
| Formula weight                  | 456.86                                                                                |
| Temperature                     | 293(2) K                                                                              |
| Wavelength                      | 0.71073 Å                                                                             |
| Crystal system                  | Orthorhombic                                                                          |
| Space group                     | P 21 21 21                                                                            |
| Cell dimensions                 | a = 8.624(3) Å    α = 90°<br>b = 9.752(4) Å    β = 90°<br>c = 26.737(10) Å    γ = 90° |
| Volume                          | 2248.6(15) Å <sup>3</sup>                                                             |
| Z                               | 4                                                                                     |
| Density (calculated)            | 1.350 Mg /m <sup>3</sup>                                                              |
| Absorption coefficient          | 0.206 mm <sup>-1</sup>                                                                |
| <i>F</i> <sub>000</sub>         | 944                                                                                   |
| Crystal size                    | 0.200 × 0.140 × 0.080 mm <sup>3</sup>                                                 |
| Theta range for data collection | 1.523 to 24.991°                                                                      |
| Index ranges                    | -10 ≤ <i>h</i> ≤ 10<br>-11 ≤ <i>k</i> ≤ 11<br>-25 ≤ <i>l</i> ≤ 31                     |
| Reflections collected           | 11850                                                                                 |
| Independent reflections         | 3970 [ <i>R</i> <sub>(int)</sub> = 0.0890 ]                                           |
| Absorption correction           | Semi-empirical from equivalents                                                       |
| Refinement method               | Full-matrix least-squares on F <sup>2</sup>                                           |

|                                        |                                        |
|----------------------------------------|----------------------------------------|
| Data /restraints /parameters           | 3970 / 0 / 300                         |
| Goodness of fit on $F^2$               | 1.138                                  |
| Final $R$ indices [ $I > 2\sigma(I)$ ] | $R_1 = 0.1238$ , $\omega R_2 = 0.2984$ |
| $R$ indices (all data)                 | $R_1 = 0.1508$ , $\omega R_2 = 0.3136$ |
| Absolute structure parameter           | 0.21(9)                                |
| Extinction coefficient                 | 0.051(9)                               |
| Largest diff. peak and hole            | 0.589 and -0.541 e.Å <sup>-3</sup>     |

## 5.2 X-ray crystal structure of compound 4al.

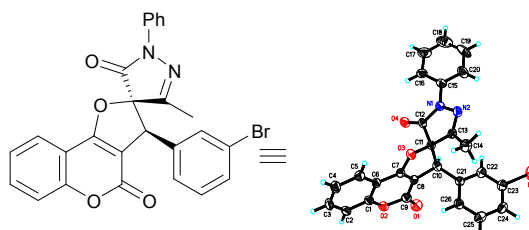

**Table S3.** Crystal data and structure refinement parameters of compound (4al)

| Parameter                       | Value                                                                                                                       |
|---------------------------------|-----------------------------------------------------------------------------------------------------------------------------|
| CCDC deposition number          | 1509834                                                                                                                     |
| Empirical formula               | C <sub>26</sub> H <sub>17</sub> BrN <sub>2</sub> O <sub>4</sub>                                                             |
| Formula weight                  | 501.34                                                                                                                      |
| Temperature                     | 293(2) K                                                                                                                    |
| Wavelength                      | 0.71073 Å                                                                                                                   |
| Crystal system                  | Monoclinic                                                                                                                  |
| Space group                     | P 21                                                                                                                        |
| Cell dimensions                 | $a = 8.743(2)$ Å $\alpha = 90^\circ$<br>$b = 9.675(3)$ Å $\beta = 94.291(6)^\circ$<br>$c = 15.147(3)$ Å $\gamma = 90^\circ$ |
| Volume                          | 1277.7(6) Å <sup>3</sup>                                                                                                    |
| $Z$                             | 2                                                                                                                           |
| Density (calculated)            | 1.524 Mg/m <sup>3</sup>                                                                                                     |
| Absorption coefficient          | 1.855 mm <sup>-1</sup>                                                                                                      |
| $F_{000}$                       | 592                                                                                                                         |
| Crystal size                    | 0.200 × 0.160 × 0.130 mm <sup>3</sup>                                                                                       |
| Theta range for data collection | 2.336° to 24.998°                                                                                                           |



|                                                       |                                                                   |
|-------------------------------------------------------|-------------------------------------------------------------------|
| Index ranges                                          | -10 ≤ <i>h</i> ≤ 10<br>-11 ≤ <i>k</i> ≤ 11<br>-18 ≤ <i>l</i> ≤ 13 |
| Reflections collected                                 | 7093                                                              |
| Independent reflections                               | 4277 [ <i>R</i> <sub>(int)</sub> = 0.0434 ]                       |
| Absorption correction                                 | Semi-empirical from equivalents                                   |
| Refinement method                                     | Full-matrix least-squares on F <sup>2</sup>                       |
| Data /restraints /parameters                          | 4277 / 1 / 326                                                    |
| Goodness of fit on <i>F</i> <sup>2</sup>              | 1.018                                                             |
| Final <i>R</i> indices [ <i>I</i> > 2σ ( <i>I</i> ) ] | <i>R</i> <sub>1</sub> = 0.0599, ω <i>R</i> <sub>2</sub> = 0.1321  |
| <i>R</i> indices (all data)                           | <i>R</i> <sub>1</sub> = 0.1018, ω <i>R</i> <sub>2</sub> = 0.1521  |
| Extinction correction                                 | n/a                                                               |
| Flack parameter                                       | 0.041(15)                                                         |
| Largest diff. peak and hole                           | 0.419 and -0.310 e.Å <sup>-3</sup>                                |

### 5.3 X-ray crystal structure of compound 4ap.

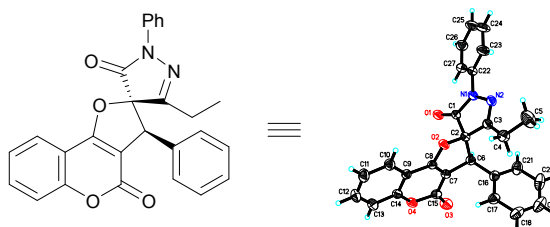

**Table S4.** Crystal data and structure refinement parameters of compound (**4aq**)

| Parameter              | Value                                                         |
|------------------------|---------------------------------------------------------------|
| CCDC deposition number | 1553766                                                       |
| Empirical formula      | C <sub>27</sub> H <sub>20</sub> N <sub>2</sub> O <sub>4</sub> |
| Formula weight         | 436.45                                                        |
| Temperature            | 293(2) K                                                      |
| Wavelength             | 0.71073 Å                                                     |
| Crystal system         | Orthorhombic                                                  |
| Space group            | P 21 21 21                                                    |
| Cell dimensions        | a = 8.3497(11) Å    α = 90°<br>b = 9.7735(13) Å    β = 90°    |

---

|                                        |                                             |                     |
|----------------------------------------|---------------------------------------------|---------------------|
|                                        | $c = 27.653(4) \text{ \AA}$                 | $\gamma = 90^\circ$ |
| Volume                                 | 2256.6(5) $\text{\AA}^3$                    |                     |
| $Z$                                    | 4                                           |                     |
| Density (calculated)                   | 1.285 Mg /m <sup>3</sup>                    |                     |
| Absorption coefficient                 | 0.087 mm <sup>-1</sup>                      |                     |
| $F_{000}$                              | 912                                         |                     |
| Crystal size                           | 0.200 × 0.160 × 0.120 mm <sup>3</sup>       |                     |
| Theta range for data collection        | 2.210 to 25.495°                            |                     |
| Index ranges                           | -8 ≤ $h$ ≤ 10                               |                     |
|                                        | -11 ≤ $k$ ≤ 11                              |                     |
|                                        | -33 ≤ $l$ ≤ 30                              |                     |
| Reflections collected                  | 12988                                       |                     |
| Independent reflections                | 4193 [ $R_{\text{(int)}} = 0.0498$ ]        |                     |
| Absorption correction                  | Semi-empirical from equivalents             |                     |
| Refinement method                      | Full-matrix least-squares on F <sup>2</sup> |                     |
| Data /restraints /parameters           | 4193 / 0 / 299                              |                     |
| Goodness of fit on $F^2$               | 1.020                                       |                     |
| Final $R$ indices [ $I > 2\sigma(I)$ ] | $R_1 = 0.0435$ , $\omega R_2 = 0.0934$      |                     |
| $R$ indices (all data)                 | $R_1 = 0.0616$ , $\omega R_2 = 0.1012$      |                     |
| Absolute structure parameter           | -0.1(9)                                     |                     |
| Extinction coefficient                 | n/a                                         |                     |
| Largest diff. peak and hole            | 0.167 and -0.153 e. $\text{\AA}^{-3}$       |                     |

---
